# Supplementary material
Source: publisher figshare collection journal article supplement (https://geolsoc.figshare.com/ndownloader/files/26181407)
Supplement: Supplementary file 1 [file 26181407]

## Sheet: Sheet1
AFR-Ig		ANT-Ig		ASA-Ig		AUS-Ig		BAL-Ig		NAM-Ig		PGT-Ig		SAM-Ig
1020	-12.223	518	-1.364	243	-8.129	430	11.11	1394	-1.397	680	-8.766	217.6	-12.132	8.3	0.387
1020	-14.14	518	-5.791	242	-4.711	434	11.83	1394	0.556	665	-3.939	222.9	-12.262	8.5	-1.03
1020	-10.487	475	-7.168	237	-7.547	396	9.552	1394	-0.471	690	-0.62	217.6	-9.117	8.2	0.561
1020	-13.56	480	-5.14	232	-7.163	435	13.527	1394	-0.032	2580	-8.228	218.6	-8.909	8.2	-0.147
1020	-13.508	483	-2.804	242	-3.322	439	11.473	1394	-0.665	680	-0.967	211.4	-9.063	7.1	-0.666
1020	-7.856	498	-5.509	234	-7.281	375	11.423	1394	0.367	2500	-6.858	219.9	-10.606	8.3	-0.465
1020	-11.665	490	-6.546	235	-5.833	433	11.654	1394	-0.874	2500	-7.739	102.2	-26.009	8.4	-2.657
1020	-6.288	500	-5.273	235	-4.238	458	11.697	1394	0.966	2500	-8.754	209.2	-12.107	8.2	-1.07
1020	-10.615	504	0.209	246	-5.217	429	-6.08	1394	0.168	2550	-6.786	221.6	-13.216	8.1	-1.181
1020	-12.09	503	-6.501	242	-6.115	419	11.321	1394	0.524	680	-4.489	220.8	-9.563	8.3	-4.142
1020	-13.665	497	-2.836	246	-5.352	436	10.6	1394	0.086	2560	-4.911	221.1	-10.616	296.3	-4.728
1020	-13.602	492	-2.897	235	-3.79	597	-2.979	1394	-0.568	2550	-5.516	216.5	-14.537	6.4	2.756
1028	-16.254	497	-0.664	235	-9.97	420	-9.634	1678	3.831	680	-4.535	220.1	-8.297	6.9	2.236
1028	-17.079	491	-0.97	236	-5.178	390	-6.759	1678	4.603	2550	-6.455	216.1	-11.331	6.9	3.085
1028	-14.755	506	-2.228	231	-6.83	404	7.154	1678	2.987	2710	-14.301	219.5	-6.518	7.6	1.896
1028	-14.499	496	4.754	234	-5.379	434	-6.008	1678	0.021	2550	-5.349	222.4	-12.628	294.9	-4.295
1028	-16.734	496	-3.518	238	-4.871	447	-5.706	1678	2.722	1835	-4.857	220.4	-9.151	6.8	4.037
1028	-15.536	502	-1.86	238	-4.691	427	-6.556	1678	3.009	141	-6.611	224.4	-12.241	304.8	-1.202
1028	-23.805	491	-4.344	236	-4.626	416	0.775	1678	2.24	3075	-8.203	220.4	-9.413	286	-5.737
1028	-12.175	495	-2.787	232	-5.321	2408	-2.892	1678	4.416	3110	-4.606	222.9	-11.694	7.5	2.213
1028	-14.92	493	-7.93	245	-6.2	487	-6.361	1678	2.905	141	-10.782	223.4	-11.407	289.7	-1.65
1028	-15.479	499	-4.913	232	-6.989	436	-6.338	1678	2.546	3230	-7.468	225.6	-11.568	5.6	1.394
1028	-14.786	496	-5.784	237	-4.6	431	-7.287	1678	3.647	3250	-8.198	220.1	-10.96	5.9	0.517
1028	-15.032	497	-7.103	243	-9.94	492	-5.447	1678	2.954	680	-1.01	218	-6.447	6.3	0.063
1035	-13.296	503	-4.812	228	-5.296	3412	-2.429	1674	2.956	660	-2.385	160.6	-55.859	6.6	2.051
1035	-14.132	497	-0.682	243	-4.541	361	10.184	1674	1.658	660	-5.241	222.1	-14.401	6.2	2.999
1035	-11.596	495	0.161	239	-5.493	428	-5.599	1674	3.19	630	-6.388	221.9	-9.645	5.4	1.319
1035	-14.42	496	-3.229	243	-5.86	451	-7.739	1674	1.948	665	-4.221	226.4	-11.527	6.8	0.784
1035	-13.252	502	-0.368	238	-6.594	649	-4.385	1674	0.626	700	-12.239	214.2	-9.086	4.4	1.086
1035	-13.292	497	-3.552	229	-5.66	1122	7.014	1674	2.771	2557	-7.903	213.9	-10.88	5.3	1.211
1035	-15.293	497	-4.145	243	-4.797	2289	-6.089	1674	1.769	2551	-7.329	218.1	-10.939	5	1.876
1035	-12.139	489	-2.342	1934	-7.94	593	-2.961	1674	1.848	2440	0.628	108.2	-22.504	5.5	3.371
1031	-14.014	496	-5.298	1934	-9.042	594	-2.659	1674	2.548	620	5.762	219.2	-10.471	5.5	2.381
1031	-14.259	497	-0.843	1934	-8.818	782	2.845	1674	3.529	125	-6.446	241.4	-11.19	2.8	0.945
1031	-14.55	495	-2.684	1934	-6.939	1950	0.564	1674	1.943	660	-4.925	237.9	0.855	2.9	2.256
1031	-14.576	490	-3.341	1934	-7.558	1718	-6.313	1674	1.466	2560	-1.283	235.9	3.787	2.9	1.088
1031	-15.454	492	-4.335	1934	-7.606	424	-4.23	1666	4.38	2550	-3.133	242.6	2.815	3	0.737
1031	-15.352	503	-6.641	1934	-8.017	422	-5.324	1666	2.755	3490	-7.352	239.7	1.527	4.3	-0.402
1031	-14.28	499	-7.464	1934	-9.113	3053	-4.871	1666	1.666	630	1.649	244.4	2.596	3.7	0.469
1031	-15.496	494	-3.476	1934	-7.056	695	0.016	1666	1.755	620	-0.197	238	0.5	3	1.762
1031	-12.21	497	-2.921	1934	-6.31	425	-4.888	1666	3.839	2540	-5.112	244.4	3.381	2.7	1.084
1031	-13.86	486	-5.207	1934	-5.931	425	-1.618	1666	2.637	720	5.162	245.9	0.68	2.8	1.157
1031	-13.316	492	-3.097	1934	-6.554	431	-2.088	1666	4.205	1739	5.253	236.9	4.609	7.2	6.945
1031	-12.625	499	-5.679	1934	-8.072	2307	-0.804	1666	2.686	460	-2.745	235.4	-0.654	7.8	7.454
1031	-11.995	495	-3.067	1934	-6.708	424	-3.103	1666	5.294	536	-0.477	209.4	-14.117	7.4	4.825
1031	-13.484	513	-1.362	1934	-7.498	439	-1.45	1666	4.074	482	0.62	243.5	-14.855	7.4	6.986
1031	-12.151	498	-1.832	1934	-6.869	444	-5.456	1666	4.077	1478	7.853	229.7	-13.834	7.2	5.707
1031	-11.88	511	-5.482	1934	-7.721	532	-11.616	1701	4.169	1361	1.067	215.9	-18.071	7.2	7.723
1031	-11.568	507	0.98	1934	-7.693	419	-6.385	1701	4.162	1713	7.968	223.3	-12.943	7.2	5.744
1031	-12.772	500	-0.761	1934	-6.159	422	-5.753	1701	3.554	650	0.636	219.4	-13.702	8.5	5.665
1532	-1.377	504	-4.431	1934	-6.815	422	-4.843	1701	3.472	1215	2.21	219.8	-16.454	1573	2.261
1532	-0.998	503	-3.126	1934	-6.539	856	1.111	1701	3.743	1067	3.158	224.5	-14.69	1573	3.138
1532	-0.63	495	-0.728	1934	-7.613	484	-7.63	1701	2.729	1067	3.84	225.3	-14.2	1573	3.573
1532	0.148	508	1.286	1934	-8.264	1029	2.256	1701	3.093	1451	10.103	213	-12.996	1573	4.104
1532	-0.443	516	-3.536	1940	-6.537	430	-9.137	1701	3.195	1090	6.28	227	-12.583	1573	4.188
1532	-1.529	530	-2.075	1940	-6.594	443	-7.315	1701	4.789	1664	5.582	221.2	-15.748	1573	6.462
1532	0.346	525	-1.763	1940	-8.225	2675	-10.562	1701	3.519	660	2.292	233.2	-23.758	1573	-4.564
1532	-0.488	508	-0.368	1940	-7.533	3448	-6.485	1701	4.474	1380	4.613	240	-6.434	1573	-5.267
1532	3.297	508	-3.186	1940	-3.657	2670	-9.608	1701	2.205	1380	2.249	238	-9.141	1573	-5.58
1532	4.297	517	2.268	1940	-6.289	3258	-5.586	1666	-0.709	1380	-2.37	236	-6.519	611	-15.927
1587	-7.115	511	-1.092	1940	-6.858	2660	-11.172	1666	0.128	1392	10	233	-6.624	611	-15.087
1587	-5.056	527	-3.147	1940	-6.239	3302	-4.952	1666	3.198	1705	7.523	238	-7.041	611	-16.271
1587	-9.82	532	-0.942	1940	-5.272	2679	-4.283	1666	1.484	1348	9.381	240	-7.768	611	-15.05
1587	-6.503	524	-0.439	1940	-6.026	3337	-8.129	1666	8.498	1760	0.221	243	-7.661	611	-15.622
1587	-6.512	522	0.578	1940	-4.585	2675	-13.962	1666	3.463	1776	-0.132	243	-3.968	608	-14.818
1587	-7.013	519	-1.933	1930	-8.319	3323	-6.531	1666	1.908	1800	0.364	233	-7.582	979	-14.616
1587	-4.827	512	-3.852	1930	-11.137	2651	-2.822	1666	0.324	1750	10.083	239	-7.117	2690	-7.349
1587	-6.805	494	-5.343	1930	-6.695	2648	-7.196	1666	3.747	1590	11.155	244	-10.723	2079	0.574
1587	-17.433	484	3.083	1930	-7.067	2650	-5.693	1666	2.437	1588	3.454	240	-5.84	2170	-1.928
1587	-5.427	492	0.63	1930	-7.661	2650	-8.445	1666	3.08	1430	5.993	240	-9.269	2170	1.778
1587	-7.964	500	-0.284	1930	-7.244	2645	-8.82	1700	0.845	1611	5.733	233	-7.104	1190	1.282
1587	-6.254	494	-1.79	1930	-7.049	2664	-7.207	1700	3.49	1845	10.502	238	-7.611	2128	1.382
1587	-7.236	492	-3.064	1930	-8.716	2396	-10.061	1700	2.955	1683	10.105	234	-8.476	2897	1.409
1587	-7.858	502	1.978	1930	-7.082	2734	-1.712	1700	3.248	1797	1.141	248	-7.477	2507	-5.326
1627	1.649	496	-1.698	1930	-7.617	2725	-3.142	1700	3.579	1466	11.015	236	-4.011	1811	0.183
1627	-2.069	493	0.76	1930	-7.942	2721	-2.361	1700	1.639	1616	-1.476	234	-7.96	2059	2.099
1627	3.507	493	-3.006	1930	-7.071	2315	-10.084	1700	2.828	1515	10.533	230	-7.433	552	-4.377
1627	-2.429	498	-3.605	1930	-8.381	2617	-2.937	1700	4.456	1784	3.619	235	-7.543	552	-5.092
1627	0.181	493	-1.607	1930	-8.079	2619	-9.081	1700	1.766	1800	2.323	243	-1.514	552	-2.78
1627	-1.659	509	0.908	1930	-8.039	2618	-7.791	1700	3.067	1791	-0.571	245	-8.133	1539	2.566
1627	-2.72	500	-2.735	1930	-7.371	2646	-8.02	1700	0.818	1790	-3.567	305	-9.433	1782	-5.574
1627	0.024	499	-3.54	1929	-4.887	2639	-12.831	1700	3.349	2300	-10.591	257	-13.278	552	-3.025
1650	7.255	499	-2.516	1929	-7.147	2629	-10.402	1519	1.536	1825	0.161	251	-14.843	2111	1.771
1650	2.707	504	-1.409	1929	-4.936	2622	-4.908	1519	1.603	1796	-1.039	249	-13.882	317	1.496
1650	1.44	503	-1.049	1929	-5.976	2641	-5.691	1519	0.762	1180	1.959	246	-18.184	316	10.885
1650	2.392	504	-2.424	1929	-5.271	2635	-3.686	1519	3.875	1180	2.707	293	-10.508	311	2.751
1650	-1.657	502	-1.889	1929	-4.104	2618	-4.738	1519	2.925	1180	2.707	250	-16.423	290	2.874
1650	0.858	502	-0.746	1929	-5.006	2616	-4.739	1519	2.936	1180	5.349	247	-15.124	311	0.32
1650	-0.185	500	-2.299	1929	-4.574	2632	-4.996	1519	2.049	1180	8.105	250	-13.747	300	-1.495
1650	-0.148	505	-3.801	1929	-4.669	2740	-2.724	1519	4.767	1180	-1.034	251	-14.999	303	-1.24
1650	1.592	500	-6.108	1929	-4.682	2720	-3.18	1519	2.775	1180	8.461	255	-15.391	312	-1.318
1650	8.553	506	-0.99	1929	-7.361	2735	-7.266	1519	0.786	1180	4.009	256	-14.544	340	-0.067
1650	1.293	508	-3.467	1929	-4.896	2737	-5.159	1519	2.003	1180	1.29	245	-14.75	303	-23.717
1650	9.136	513	-3.003	1929	-6.826	2732	-6.717	1519	2.183	1180	-0.324	739	2.476	420	4.051
1665	-1.969	500	-2.452	1929	-5.067	2729	-6.734	1180	-10.042	1180	3.772	253	-15.648	468	5.553
1665	-1.904	497	-7.772	1929	-6.366	2728	-7.403	1180	-7.977	1180	7.043	246	-15.423	1035	1.99
1665	-2.115	497	-6.127	1929	-6.025	2727	-5.335	1180	-7.85	1190	6.201	741	-19.984	1082	3.193
1665	-1.016	500	-3.154	1929	-7.22	2560	-2.074	1180	-7.638	1190	2.257	798	2.025	1102	3.375
1665	-2.683	498	-6.672	1929	-5.348	2737	2.488	1180	-7.728	1190	4.862	633	-3.8	1127	3.37
1665	-1.733	511	-0.239	1929	-5.186	2625	-1.833	1180	-9.006	1190	3.285	251	-13.637	1110	4.53
1665	-3.215	518	-0.795	1929	-5.031	2578	-0.791	1180	-7.761	1190	4.508	252	-14.822	1066	3.269
1665	-1.737	507	-0.774	1929	-6.106	2537	-5.543	1180	-6.752	1190	0.607	243	-15.255	1056	1.187
1942	-0.513	512	-2.388	1929	-4.384	2577	-7.662	1180	-8.805	1190	10.536	245	-18.419	1046	1.521
1942	1.304	511	1.736	1929	-4.966	2607	-3.048	1180	-8.427	1190	4.508	778	-20.4	994	3.287
1942	-1.002	507	0.668	1929	-4.887	2976	-14.79	1180	-9.608	1190	6.99	239	-16.286	995	2.928
1942	-1.026	507	-1.926	1934	-3.96	2616	-16.321	1180	-7.322	1190	8.408	265	-15.436	1000	3.363
1942	-0.111	504	-1.471	1934	-3.272	2622	-21.325	1464	3.168	1190	6.281	256	-12.655	994	2.93
1942	5.564	505	-2.16	1934	-2.828	2639	-6.672	1464	1.871	1190	2.85	441	-8.371	994	3.036
1942	2.037	506	-2.844	1934	-2.879	3182	-10.725	1464	0.574	1190	1.317	297	-15.003	1000	3.252
1942	1.699	507	0.328	1934	-3.393	2516	-9.153	1464	1.642	1190	1.671	285	-14.633	978	2.576
2041	-25.197	506	-0.117	1934	-3.621	2463	-10.525	1464	0.439	1190	5.767	246	-15.006	974	2.457
2047	-2.293	558	-1.462	1934	-2.048	3084	-11.943	1464	2.516	1190	5.767	243	-16.631	1019	3.353
2047	-1.52	519	-10.44	1934	-3.183	3121	-7.109	1464	-0.334	1190	6.83	248	-16.681	968	2.468
2047	1.117	533	-1.279	1934	-3.874	3146	-9.532	1464	0.844	1190	1.157	246	-12.499	968	2.284
2047	-0.157	537	-2.711	1934	-2.738	2944	-7.005	1464	0.093	1190	5.137	245	-17.987	971	1.788
2047	-1.936	527	3.056	1934	-6.057	2965	-14.656	1464	0.277	1190	4.783	256	-16.79	992	0.251
2047	-3.226	496	-2.298	1934	-4.531	2624	-12.087	1464	1.558	1197	4.377	245	-15.101	990	0.466
2047	-0.003	482	-7.918	1934	-7.076	2554	-7.941	1464	1.333	1197	4.137	249	-16.72	990	0.5
2047	-1.442	500	-4.631	1934	-1.165	2586	-6.565	1392	0.43	1197	7.763	246	-16.998	976	-0.093
635	9.087	517	-4.518	1934	-4.275	2620	-3.768	1392	-0.797	1197	3.153	252	-17.017	1155	4.96
633	11.453	498	0.347	1934	-5.636	2543	-3.972	1392	-0.884	1197	-0.038	248	-15.188	1182	6.243
641	11.686	493	-9.273	1934	-2.424	2564	-5.629	1392	-0.521	1197	0.545	990	-23.823	1106	4.725
635	10.043	504	-6.869	1934	-6.358	2518	-8.832	1392	-0.351	1197	5.635	247	-16.544	1155	5.492
632	11.279	497	-2.471	1934	-6.004	2569	-6.43	1392	-0.082	1197	5.293	244	-13.243	1182	6.172
636	10.575	500	-3.466	1934	-6.502	2578	-5.728	1392	0.253	1197	1.655	263	-15.889	1106	4.299
586	6.571	500	-3.068	1931	-0.902	2506	-8.972	1392	0.391	1197	2.604	246	-16.321	1105	3.707
634	10.61	524	-2.949	1931	2.622	2533	-6.777	1392	0.045	1197	0.693	246	-14.519	1139	4.994
633	7.963	517	-1.864	1931	0.759	2549	-9.325	1392	-0.197	1211	2.412	265	-15.965	1026	3.3
640	10.771	512	1.431	1931	4.004	2543	-7.856	1392	1.322	1211	5.695	877	-3.471	1093	4.078
597	8.049	515	-3.247	1931	4.251	2574	-11.302	1392	0.178	1211	2.837	235	-15.466	1093	3.264
636	11.129	518	0.976	1931	1.735	2574	-9.168	1392	1.27	1211	5.755	261	-15.937	1106	0.4
638	10.317	513	2.751	1931	2.44	2601	-8.352	1796	4.332	1211	4.895	242	-13.888	1167	1.144
641	10.904	540	2.214	1931	1.992	2596	-10.23	1796	4.441	1211	2.494	240	-18.073	1167	1.357
601	9.462	533	-1.962	1931	2.372	2616	-7.633	1796	3.842	1211	9.889	267	-20.197	1093	-0.154
615	7.823	503	-3.606	1931	0.9	2663	-7.498	1796	3.146	1211	9.423	612	-3.424	1004	-2.455
641	9.63	507	-1.755	1943	0.038	2618	-9.575	1796	4.768	1211	2.645	586	-22.309	904	-4.822
636	11.122	514	-6.17	1943	4.259	2679	-6.517	1796	4.459	1211	4.438	250	-17.407	1026	0.234
642	12.952	507	-11.615	1943	0.983	2707	-6.809	1796	2.848	1211	9.129	2635	1.871	1078	0.278
636	8.965	500	-5.821	1943	-0.084	2536	-10.502	1796	2.616	1211	3.75	291	-14.609	1033	-0.326
624	10.808	499	-4.392	1943	1.768	2618	-8.594	1796	1.003	1400	3.689	253	-11.951	1026	-0.38
622	9.659	505	1.662	1943	1.061	2642	-8.053	1796	3.486	1400	-3.667	250	-13.42	1060	0.221
636	9.536	500	-0.194	1943	1.412	2638	-8.274	1830	-0.842	1400	-1.633	262	-14.881	1290	5.288
635	9.897	504	-5.034	1943	2.134	2615	-8.532	1845	-0.845	1400	2.718	258	-15.52	1290	6.214
627	7.279	513	-4.167	1943	0.368	2652	-6.355	1850	0.301	1400	-1.466	565	-2.775	1290	5.466
636	9.15	506	-0.764	1943	0.015	2536	-7.262	1830	0.208	1400	0.83	565	-11.258	1290	5.769
627	9.825	514	0.353	1943	1.602	2882	0.231	1845	-1.161	1400	0.12	242	-17.345	1290	7.382
640	9.776	509	2.025	1943	1.138	2545	-10.055	1900	1.651	1400	1.748	253	-15.735	1290	6.528
635	10.974	504	-1.889	1943	1.497	2576	-10.462	1845	0.74	1400	1.466	247	-16.225	1290	5.859
540	8.961	504	-1.846	1943	0.151	2407	-14.552	1865	1.208	1400	-3.073	247	-14.035	1270	7.093
586	8.402	502	-5.526	1943	0.603	3218	0.274	1845	-0.49	1400	-3.333	246	-15.517	1270	9.423
633	10.598	497	-4.638	1943	1.229	2607	-6.662	1841	0.425	1400	1.56	442	-9.377	1270	9.969
631	11.224	512	-2.237	1943	-2.223	2550	-7.073	1841	2.887	1416	-1.087	246	-18.943	1270	9.917
633	9.513	507	-1.407	1943	-1.049	2595	-5.355	1835	1.772	1416	0.073	280	-9.406	1270	8.134
635	9.714	514	-5.641	1943	-1.858	2796	0.141	1835	3.046	1416	-0.282	241	-14.829	1270	8.931
633	10.409	516	-1.225	1943	0.967	2508	-4.551	1835	2.633	1416	2.201	238	-17.231	795	4.634
633	10.253	503	-4.725	1943	-0.225	2756	-1.369	1890	4.207	1416	1.137	767	-13.802	799	6.017
633	14.695	500	-2.683	1943	1.58	2763	-4.173	1835	4.382	1416	3.88	245	-15.939	766	5.768
633	10.271	502	-6.959	1943	4.152	2729	-2.718	1835	2.513	1416	1.561	256	-14.027	825	5.571
633	8.282	504	-3.011	1943	1.176	2623	-5.751	2100	8.71	1416	-1.441	570	-7.648	793	5.458
633	9.589	508	-3.346	279.6	12.118	2669	-6.042	1820	0.677	1420	-2.686	255	-18.366	826	5.454
633	9.308	514	-5.322	279.6	12.453	2682	-4.367	1820	-0.377	1420	-2.972	255	-18.404	779	5.674
1290	-0.62	516	2.491	279.6	11.904	2676	-5.158	1820	-3.201	1420	-6.043	255	-12.985	771	6.271
1290	1.105	508	0.913	279.6	11.212	2673	-7.278	1820	1.048	1420	-5.471	255	-15.527	798	-10.226
1290	1.393	510	0.193	279.6	12.544	2675	-4.763	1820	0.043	1420	0.3	253	-17.634	816	-7.972
1290	0.845	505	9.39	279.6	9.989	2713	-3.599	1820	0.315	1420	1.036	905	0.206	806	-12.685
1290	0.854	504	-1.981	279.6	11.703	2696	-4.345	1820	1.244	1420	4.679	259	-19.286	854	-7.754
1755	1.799	507	0.64	279.6	12.042	2657	-5.068	1820	-1.354	1420	0.231	262	-15.243	593	-18.056
1755	0.1	509	-0.663	279.6	12.393	2683	-4.669	2100	6.246	1420	-1.993	250	-14.646	590	-14.275
1755	2.994	516	-1.993	279.6	11.974	2697	-4.902	1900	2.515	1420	2.715	680	-9.564	670	-26.277
1755	2.114	510	-1.381	279.6	12	2724	-3.351	1820	-2.113	1420	-1.283	251	-14.663	611	-19.958
1755	0.833	505	-0.752	279.6	13.349	2698	-6.072	1880	2.853	1421	-1.529	626	-16.34	592	-19.295
1755	1.892	515	-2.718	279.6	12.443	2508	-7.73	1860	-0.82	1421	-0.903	253	-15.94	608	-19.721
1755	-1.699	506	1.916	279.6	11.38	2667	-5.578	1820	-0.004	1421	2.546	261	-13.713	604	-21.714
1755	1.733	499	5.063	279.6	13.614	2708	-7.427	1860	1.019	1421	4.102	253	-15.186	597	-18.946
1782	2.997	503	2.287	279.6	12.061	2726	-5.431	1820	0.504	1421	6.353	243	-15.879	620	-12.988
1755	0.555	513	-0.924	279.6	11.06	2728	-4.605	1850	0.34	1421	4.32	560	-11.329	613	-16.15
1755	0.709	505	0.449	279.6	12.267	2722	-7.196	1820	0.557	1421	-0.033	257	-15.696	610	-12.531
1061	2.925	495	-3.605	279.6	11.517	2741	-3.93	1820	-0.801	1421	4.388	272	-13.834	613	-13.668
1061	2.493	493	-2.316	279.6	12.225	2731	-3.487	1820	-1.08	1421	2.969	259	-14.374	617	-11.351
1097	3.411	498	-3.316	283.8	6.248	2738	-4.822	1820	-0.428	1421	4.484	252	-15.209	626	-5.06
1061	3.018	501	-4.244	283.8	13.218	2725	-6.019	1830	2.327	1430	4.327	250	-14.318	618	-10.063
1061	3.092	499	-3.713	283.8	10.705	2719	-6.222	1863	2.003	1430	4.682	247	-13.208	626	-7.384
1061	2.314	505	-4.572	283.8	2.894	2734	-3.575	1870	0.452	1430	1.873	291	-12.874	606	-13.529
1061	2.247	500	-7.766	283.8	12.343	2733	-5.051	1820	2.138	1430	0.75	256	-18.62	608	-7.671
587	-11.528	499	-5.645	283.8	10.975	2716	-4.661	1820	0.524	1430	3.204	236	-14.388	616	-8.719
530	-12.277	490	-1.986	283.8	14.462	2730	-4.151	1820	1.238	1430	2.236	254	-13.618	619	-6.811
516	-11.311	493	-3.599	283.8	9.217	2736	-3.727	1820	1.942	1430	0.721	268	-16.021	630	-9.044
539	-12.162	488	0.205	283.8	10.505	2732	-4.038	1820	-2.945	1430	1.259	739	-18.571	615	-17.189
534	-12.841	494	-6.468	283.8	10.386	2735	-5.086	1820	4.619	1430	-1.053	269	-12.619	2317	0.303
552	-11.962	501	-3.159	283.8	12.561	2742	-5.604	2200	2.062	1430	0.166	263	-17.052	2336	-3.288
527	-14.897	494	-1.425	283.8	14.265	2734	-4.035	1820	2.207	1430	1.163	258	-14.459	2333	3.585
521	-15.963	499	-2.052	283.8	3.255	2730	-4.979	1820	1.66	1430	-2.635	255	-17.448	2353	-3.947
522	-15.486	491	-4.066	283.8	10.987	2740	-4.678	1860	1.876	1430	3.647	238	-16.194	2350	-9.05
529	-13.914	496	-0.343	283.8	-7.861	2727	-2.821	1820	1.781	1430	-0.803	261	-19.409	2353	-5.351
526	-13.206	489	-1.588	283.8	11.629	2741	-4.371	1865	-6.903	1430	-1.091	251	-17.091	2360	-5.328
504	-15.28	496	0.273	283.8	2.353	2735	-4.226	2450	-2.707	1430	-0.352	242	-23.16	2302	-7.056
511	-15.256	501	-6.064	283.8	11.425	2732	-2.673	1820	-0.713	1430	1.393	257	-16.149	2319	-6.348
507	-14.934	502	-0.299	283.8	-16.022	2730	-5.31	1820	-0.033	1430	1.355	256	-13.742	2331	-3.299
517	-15.418	501	-0.943	283.8	9.634	2738	-3.547	1820	-1.124	1430	-0.026	1920	-14.397	2155	4.94
523	-15.101	500	-5.672	275.5	-9.116	2737	-6.054	1820	-0.323	1430	3.713	300	4.248	2056	2.965
540	-16.024	499	-5.258	275.5	-7.833	2733	-5.505	1820	-0.271	1430	4.164	280	4.676	2166	7.055
491	-15.071	497	-6.471	275.5	-9.212	2730	-5.168	1820	-1.011	1430	0.712	281	7.229	2300	2.257
549	-12.334	491	-6.076	275.5	-8.495	2736	-4.275	1820	-1.18	1430	2.486	280	1.606	2308	1.112
525	-15.221	495	-5.984	275.5	-10.463	2740	-5.419	1820	-0.001	1430	0.358	280	2.792	2300	4.389
541	-14.385	492	-4.595	275.5	-10.117	2730	-4.754	1820	-1.212	1430	-0.256	278	7.217	2329	5.251
546	-14.073	492	-3.863	275.5	-8.216	2726	-3.889	1820	-1.9	1430	-0.352	283	1.871	2332	4.962
540	-1.355	486	-5.103	275.5	-10.639	2737	-7.62	1820	-12.774	1430	-0.611	332	-0.6	2343	2.569
560	3.783	498	-5.901	275.5	-9.469	2732	-2.329	1820	-0.462	1430	0.875	294	9.472	2254	4.284
559	0.669	497	-2.056	275.5	-9.646	2736	-3.503	1820	1.032	1655	1.964	298	1.315	2177	4.349
550	-0.957	499	-7.355	275.5	-8.833	2656	1.182	1820	-11.347	1655	5.757	277	2.595	2235	1.976
546	3.593	500	-6.68	275.5	-9.213	2676	0.422	1820	0.658	1655	1.811	288	5.193	2383	5.046
552	2.289	513	-6.019	275.5	-10.347	2653	0.459	1820	0.595	1655	-0.632	273	3.708	2283	-1.935
541	0.509	502	-5.664	275.5	-10.388	2643	0.551	1820	1.606	1655	4.449	272	5.893	2354	1.855
1015	6.786	499	-2.706	275.5	-9.223	2651	0.935	1820	1.181	1655	3.586	275	13.143	1211	5.388
1036	6.781	501	-2.326	275.5	-9.823	2663	0.482	1820	-1.712	1655	3.363	282	3.892	1211	5.033
1063	6.892	501	-2.223	275.5	-8.178	2653	0.051	1820	2.038	1655	-0.896	282	6.02	1411	8.537
1100	7.891	506	-2.963	275.5	-10.38	2690	1.366	1820	-0.813	1655	4.317	271	6.45	1411	8.395
1042	7.668	508	-5.465	275.5	-9.228	2676	-1.283	2311	-8.932	1655	0.858	275	12.941	1411	8.428
1061	5.601	497	-3.245	275.5	-9.035	2675	-3.63	1800	-7.398	1655	3.231	268	2.169	1411	8.301
1052	4.927	497	-3.869	1849	-5.15	2685	-2.572	1800	-9.294	1655	4.205	266	-1.244	1411	8.264
1055	5.255	514	-0.93	1834	-6.679	2664	0.361	2000	-4.58	1655	4.56	261	-5.142	1412	6.305
1059	5.786	493	-4.553	1829	-6.146	2675	0.327	1800	-9.159	1655	2.319	500	-9.003	1412	6.51
1045	3.809	496	3.81	1821	-6.579	2666	1.947	1800	-8.335	1655	3.941	267	-0.272	1412	6.769
556	11.23	493	-7.37	1834	-5.821	2679	1.231	1800	-8.687	1675	-4.325	278	-4.97	1208	4.808
556	9.689	497	-4.32	1830	-6.031	2679	1.006	1800	-8.915	1675	-3.535	281	-2.522	1405	6.065
569	-1.574	502	-7.567	1799	-6.585	2673	1.476	2500	-6.96	1675	0.386	268	-3.209	1256	4.017
590	-1.54	496	-1.806	1813	-6.589	2672	-2.326	2000	-16.611	1675	-5.31	280	-4.806	479	-4.885
593	5.715	498	-4.366	1824	-5.955	2676	-4.85	1800	-5.838	1675	-3.777	274	-2.719	473	-5.057
1979	-0.674	493	-2.451	1869	-5.033	2671	-1.726	1800	-6.031	1675	-1.89	479	7.494	471	-4.52
1979	-3.379	490	-8.771	1827	-6.185	2797	2.889	1800	-9.984	1675	-1.501	479	5.074	473	-5.467
1979	-2.015	494	-5.676	1774	-6.929	2686	0.908	2500	-5.821	1675	-3.986	479	5.705	468	-4.886
1979	7.832	492	-7.592	1792	-6.768	2679	0.148	1800	-7.617	1675	-3.276	479	5.818	476	-5.545
1979	-1.28	507	-1.694	1820	-5.965	2672	0.055	1800	-6.908	1675	-4.116	479	6.272	478	5.506
1979	-2.163	509	2.298	1796	-6.937	2658	0.688	1800	-4.651	1680	3.917	479	5.808	474	7.205
1979	-2.206	511	-2.899	1776	-7.1	2678	-0.312	1800	-6.797	1680	-1.181	479	6.317	478	6.962
1979	-0.737	542	0.047	1828	-6.53	2649	-2.092	1800	-1.057	1680	6.433	479	4.959	476	6.807
1979	0.885	506	2.353	1835	-6.592	2656	0.303	1800	-8.285	1680	-1.747	479	8.235	478	6.023
1979	-1.684	502	-0.059	1770	-7.151	2643	1.041	1800	-9.414	1680	3.562	479	5.886	475	5.979
1979	-0.465	500	-0.75	2087	-8.796	2661	-0.103	1900	-11.999	1680	3.578	479	6.877	478	5.945
1979	-2.031	505	2.731	2450	2.059	2662	-0.023	2600	-0.474	1680	0.367	479	6.578	473	-4.746
1380	-12.904	507	0.058	2291	1.518	2670	-3.557	1800	-3.819	1680	0.481	479	5.097	473	-3.74
1380	-11.611	509	-1.582	2193	-1.841	2665	-0.454	1800	-4.057	1680	-0.939	479	6.936	471	-4.302
1380	-9.875	514	-2.175	2466	4.883	2657	-0.269	2400	7.768	1680	0.481	479	5.059	490	-3.883
1380	-11.877	507	1.527	2269	-0.823	2667	-2.133	1800	-7.266	1680	0.239	479	6.014	475	-3.577
1380	-1.004	507	-1.889	2448	4.106	2664	-2.704	2000	-2.264	1680	0.126	479	5.741	466	-4.577
1380	-3.261	513	-0.024	2280	-2.056	2691	-3.221	1800	-16.703	1680	-1.552	479	8.142	316	0.058
1380	-11.313	508	-1.493	2426	4.492	2743	2.722	2744	-2.884	1680	3.66	479	7.028	317	-0.128
1380	-0.374	504	-2.277	2181	-2.893	2867	0.913	2744	-1.772	1680	-3.65	479	11.862	311	0.011
1380	-7.012	507	-1.37	2268	0.357	2661	0.333	2744	-0.946	1680	2.127	470	2.659	312	0.836
1380	5.269	506	0.337	2438	1.947	2651	2.249	2744	-1.33	1680	1.288	470	2.051	316	0.555
1373	-9.919	513	-1.284	2404	-1.902	2862	-0.379	2744	-1.697	1680	-1.778	470	1.934	316	-0.243
1373	-10.499	510	-2.983	2493	4.66	2687	0.505	2744	-1.961	1680	0.239	470	3.422	236	4.013
1373	-6.443	504	-13.192	2092	-2.318	2686	1.735	2744	-1.045	1680	0.126	470	2.777	238	4.461
1373	-11.167	504	-1.136	1933	-4.895	2689	0.496	2744	-2.817	1680	2.368	470	0.288	235	3.318
1373	-5.747	500	-3.734	2059	0.933	2673	1.792	2744	-1.756	1680	-0.682	470	1.532	239	3.41
1373	-10.979	496	-2.406	2433	0.815	2672	0.444	2744	0.02	1680	1.304	470	2.607	235	3.751
1373	-9.444	494	-2.74	2544	6.297	2684	1.645	2744	-0.531	1680	1.53	470	1.876	237	4.509
1373	-10.908	493	-2.09	2393	0.374	2690	0.34	2744	-4.541	1680	1.772	470	0.387	226	1.645
1373	-10.148	506	-1.798	2099	-1.557	2673	0.772	2744	-2.781	1680	2.158	470	1.882	229	1.622
1373	-8.909	506	-3.203	1919	-3.211	2674	0.133	2744	-0.198	1680	2.4	470	1.594	224	1.711
987	-6.953	508	-6.05	1952	1.332	2675	1.631	2744	-3.821	1680	2.626	470	1.599	224	2.141
987	-15.667	508	-2.334	1874	-1.731	2709	-1.16	2744	0.062	1680	-4.071	470	3.505	222	1.959
987	-28.2	499	-1.281	1872	0.673	2696	1.876	2744	-1.363	1680	3.48	470	3.507	225	1.111
987	-9.857	498	-0.906	1861	-4.987	2712	1.32	2744	-3.035	1680	4.916	470	2.25	16	-1.428
987	-16.392	508	1.951	1963	-7.837	2677	-0.595	2744	-1.498	1680	-0.069	470	2.391	16	-1.678
987	-20.128	491	-5.699	2001	-0.328	2689	0.071	2744	0.614	1680	4.319	470	2.256	17	-1.23
987	-6.815	486	-3.759	2081	0.101	2710	1.841	2744	0.289	1680	1.109	470	3.171	17	-1.124
987	-7.648	522	-2.997	1982	7.686	2674	-0.194	2744	1.981	1680	2.852	470	2.644	16	-1.921
987	-7.958	493	-15.024	1815	1.16	2723	1.685	2744	1.524	1680	3.094	490	3.542	481	-4.644
987	-4.509	506	0.525	1935	-10.947	2647	2.135	2744	-1.921	1680	0.141	490	0.706	473	-5.221
768	10.984	502	-1.907	1925	6.092	2686	1.15	2744	-0.974	1680	3.707	490	2.213	486	-4.099
836	10.278	503	-9.262	1922	-0.733	2677	2.859	2744	-0.044	1680	2.4	490	1.796	490	-4.919
883	12.103	500	-3.955	1631	-8.723	2662	2.277	2744	1.048	1680	2.997	490	3.701	475	-5.128
615	6.903	503	-2.576	1909	-0.131	2669	2.226	2744	0.388	1680	0.481	490	5.364	477	-4.382
827	9.094	505	-2.686	2003	5.059	2660	-1.677	2744	-1.014	1680	0.609	490	1.23	282	-5.663
870	11.094	500	-2.113	2038	3.305	2682	-0.751	2744	-1.018	1680	3.465	490	2.145	286	1.855
840	11.364	504	-3.598	2048	6.915	2691	1.43	2744	1.411	1680	4.062	490	5.747	288	1.706
773	10.651	502	-2.764	1940	1.191	2697	1.972	2715	1.566	1680	2.513	490	3.76	283	1.339
844	12.512	502	-1.996	2118	3.631	2678	2.231	2715	-1.169	1680	-1.407	490	4.881	287	1.24
813	9.069	501	-2.678	1876	0.599	2666	0.208	2715	1.016	1680	3.593	111	7.138	284	1.278
837	9.458	502	-3.687	1890	1.855	2719	1.739	2715	-0.977	1680	-3.151	111	8.481	275	1.423
809	10.59	504	-3.957	2019	1.181	2668	1.795	2715	0.69	1680	3.707	111	7.768	282	1.2
880	13.416	486	-4.586	1948	3.556	2677	-0.095	2715	0.101	1680	-3.537	111	9.315	278	1.473
789	7.666	498	-3.582	1999	5.115	2633	-0.582	2715	-1.941	1680	-7.426	110	5.451	279	2.16
839	10.841	491	-1.887	1743	-2.238	2627	0.364	2715	-2.592	1680	0.044	111	6.241	280	2.441
766	10.655	495	-4.744	2013	2.56	2602	-1.528	2715	-0.489	1680	0.27	113	6.47	283	0.819
841	12.028	493	-2.585	1992	2.697	2677	0.784	2715	-2.956	1680	4.545	107	8.183	278	1.24
730	9.828	492	-4.045	1998	1.691	2677	1.126	2715	-1.409	1680	0.851	110	6.97	281	0.131
882	10.972	493	-4.277	2015	7.108	2678	1.609	2715	-0.572	1680	5.497	109	8.341	275	1.73
763	7.748	495	-2.79	1803	-1.777	2702	0.068	2715	-1.721	1680	5.013	108	8.548	276	1.454
810	8.214	498	-1.582	2022	6.11	2695	0.146	2715	0.269	1680	1.526	109	8.241	279	2.232
821	9.503	499	-1.683	2078	-0.775	2670	2.175	2715	-0.798	1680	-3.424	108	7.811	274	1.304
825	9.309	505	-1.864	2045	4.232	2714	-1.448	2723	-0.047	1680	0.27	110	8.366	261	1.385
847	9.776	496	-3.368	1921	0.216	2712	-0.312	2723	-1.014	1680	2.642	113	8.125	260	1.487
843	10.444	505	-4.175	2020	3.294	2644	-4.169	2723	-1.998	1680	-1.521	108.9	7.729	255	1.986
812	10.288	502	-1.296	1658	-4.235	2712	-1.397	2723	1.295	1680	7.401	112	5.101	263	2.006
825	10.77	505	-2.783	1756	-9.388	2623	-4.297	2723	-0.885	1680	2.107	111	5.701	262	1.476
806	11.961	499	-3.25	1880	0.463	2705	-2.66	2723	-1.516	1680	0.496	109.1	7.349	267	2.479
905	10.794	377	2.94	1961	5.613	2485	-6.87	2723	-0.1	1680	1.639	110.4	8.474	253	1.188
999	11.833	377	3.097	1953	5.451	2717	-1.819	2723	-2.062	1680	-2.359	112	7.692	252	1.905
925	13.268	377	1.871	1397	-7.973	2773	1.824	2723	-0.137	1680	3.722	109.3	9.495	252	0.987
939	9.984	377	3.323	1821	2.229	2802	0.693	2723	0.397	1657	0.345	109	8.333	253	2.301
701	6.745	377	1.76	1955	3.61	2772	1.808	2723	0.158	1657	-3.823	110	9.398	254	1.881
822	10.258	377	2.575	1931	3.856	2760	2.098	2723	-1.984	1657	1.055	112	9.211	252	1.536
775	8.022	377	4.456	1878	2.766	2776	2.678	2723	-0.996	1657	-2.049	111.9	7.907	258	2.253
772	7.007	377	3.945	1335	-10.917	2739	1.885	2723	-0.516	1657	-0.963	111	9.592	228	-0.238
790	12.257	377	3.404	1674	-3.097	2772	2.039	2723	-1.335	1657	0.345	130	14.804	241	-0.447
817	11.055	377	2.07	2015	5.392	2787	2.222	2723	0.301	1657	-2.982	132	13.208	239	-4.246
766	10.704	377	4.104	1968	2.346	2742	2.571	2723	-2.897	1657	-7.15	132	13.938	247	-0.781
803	9.33	377	1.982	1848	1.983	2749	2.753	2723	-4.974	1657	2.251	132	16.124	233	-1.45
819	10.279	373	1.752	1890	0.772	2748	3.378	2683	-1.357	1657	-6.329	130	12.678	224	-0.502
804	8.426	373	3.986	1856	2.175	2766	5.574	2683	-1.085	1657	9.746	129	15.573	223	-0.731
806	10.291	373	2.437	1995	2.845	2789	4.412	2683	-0.44	1657	-4.178	131	13.548	228	-0.419
807	8.43	373	0.675	1612	-5.01	2762	4.393	2683	-1.669	1657	-6.795	131	13.344	218	-0.223
809	5.801	373	1.128	1924	-4.529	2814	2.873	2683	-0.225	1675	-5.181	116	14.515	226	0.716
827	7.595	373	2.137	434.8	-15.585	2815	0.215	2683	-3.382	1675	-1.969	115	13.974	233	-0.204
822	6.474	811	-3.72	434.8	-9.289	2818	-1.352	2683	-2.482	1675	-2.792	117	16.359	37	5.601
804	4.663	373	4.129	434.8	-10.204	2815	-2.833	2683	-3.278	1675	-5.648	114	15.72	36	4.234
813	5.796	373	0.637	434.8	-10.362	2826	1.353	2683	-0.581	1675	-2.566	118	16.312	36	5.082
872	8.92	599	-8.344	434.8	-10.883	2813	6.312	2683	-1.986	1675	-3.389	118	15.249	37	3.347
710	6.057	345	-3.444	434.8	-7.811	2797	3.415	2683	-2.135	1675	-9.925	109	10.421	37	4.29
747	7.606	345	0.182	434.8	-7.822	2807	2.57	2683	-0.682	1675	2.775	108	12.372	36	4.03
728	7.624	345	1.335	434.8	-15.356	2770	-2.034	2683	0.178	1675	-1.969	110	10.94	38	4.868
725	7.806	345	0.454	434.8	-9.984	2773	1.503	2683	0.314	1675	5.857	109	10.974	42	6.781
741	8.422	345	0.148	434.8	-8.647	2771	1.867	2683	1.56	1675	0.645	109	9.712	39	6.698
716	8.661	345	1.974	434.8	-9.576	2771	2.245	2683	-1.057	1675	5.389	110	10.595	41	5.207
727	7.71	345	-4.492	434.8	-12.686	2769	2.769	2741	0.835	1675	4.679	107	9.758	39	5.929
725	8.356	345	-2.035	434.8	-9.033	2768	0.955	2741	-0.383	1705	9.337	109	9.732	40	5.333
737	10.134	345	-13.468	434.8	-9.218	2657	0.232	2741	0.238	1705	4.586	111	12.314	41	6.33
704	8.465	345	-0.866	434.8	-7.907	2701	1.76	2741	-0.797	1705	4.482	109	10.116	41	5.864
699	7.62	345	-0.371	434.8	-8.321	2652	0.862	2741	-0.579	1705	1.767	109	10.01	35	3.366
735	7.818	345	2.229	434.8	-9.249	2654	0.193	2741	2.103	1705	8.961	108	8.916	38	7.747
737	8.102	345	-3.529	434.8	-9.574	2687	1.441	2741	0.181	1705	6.006	108	10.223	38	3.639
726	7.949	345	-3.193	434.8	-15.553	2654	1.555	2741	-1.649	1705	6.361	109	9.323	35	4.037
729	8.93	354	-3.655	434.8	-9.4	2664	0.33	2741	1.191	1705	0.619	110	7.253	35	2.4
699	6.847	354	-3.7	424.1	-5.997	2674	2.099	2741	1.492	1705	7.896	109	10.829	36	3.108
717	8.965	354	-1.777	424.1	-9.628	2667	3.322	2741	0.403	1705	1.757	108	11.51	35	4.744
746	10.189	354	0.323	424.1	-14.341	2931	3.724	2741	0.245	1705	6.476	109	9.83	35	4.104
753	9.281	354	0.611	424.1	-6.731	2930	3.591	2741	1.334	1705	7.781	144	-11.063	42	6.463
754	8.823	354	0.425	424.1	-9.096	2923	2.889	2741	1.45	1741	1.625	138	-6.672	35	2.134
731	9.75	354	-0.338	424.1	-9.735	2924	3.232	2741	-0.008	1741	0.779	143	-6.314	304.2	3.222
713	11.102	354	-3.551	424.1	-9.805	2932	2.26	2741	-0.775	1741	4.681	144	-5.548	305.7	1.074
745	9.835	354	-4.929	424.1	-8.845	2934	3.085	2741	0.667	1741	6.104	143	-6.287	304.8	3.173
710	9.513	354	-4.505	424.1	-7.158	2925	1.989	2719	-0.241	1741	0.896	145	-5.565	305.6	2.311
736	9.376	354	-1.779	424.1	-8.499	2930	1.962	2719	2.078	1741	-0.638	144	-5.647	305.2	3.529
747	7.64	354	-0.081	424.1	-10.257	2646	1.262	2719	2.084	1741	0.782	146	-5.73	304.2	2.996
752	9.428	354	-0.114	424.1	-8.116	2682	0.733	2719	2.024	1741	2.794	146	-4.432	304.4	3.254
729	9.629	354	-1.109	424.1	-9.593	2637	1.836	2719	1.924	1741	1.016	144	-7.159	282.7	2.264
720	7.558	354	-3.033	424.1	-8.044	2641	1.572	2719	-0.167	1741	2.436	145	-5.776	282.7	1.275
642	6.766	364	-3.088	424.1	-9.188	2932	3.501	2719	1.195	1741	6.576	139	-5.934	282.2	2.545
724	8.441	364	0.289	424.1	-10.219	2695	-1.817	2719	1.671	1741	6.576	139	-5.684	282.7	1.894
697	10.09	364	0.213	424.1	-7.868	2866	1.357	2719	0.336	1741	4.573	141	-5.867	282.7	2.963
343	0.436	364	-0.797	428	-4.373	2643	2.457	2719	0.207	1741	7.527	146	-4.595	282.2	2.392
669	6.743	364	-2.167	428	-7.609	2642	0.864	2719	-0.58	1741	1.254	137	-4.973	282.6	2.069
698	9.032	364	-0.057	428	-5.803	2739	1.259	2719	0.873	1741	4.332	139	-6.863	272.4	2.031
679	7.826	364	-4.161	428	-8.167	2748	1.884	2719	-0.611	1741	1.137	127	-6.053	272.8	2.337
684	7.868	364	-8.275	428	-8.411	2749	0.504	2719	1.221	1741	-0.398	131	-7.286	273	3.797
649	8.217	364	-1.889	428	-5.925	2736	1.438	2719	-0.699	1741	2.319	129	-5.906	223.8	-0.726
691	7.747	364	-0.817	428	-5.555	2734	0.871	2719	1.62	1741	1.016	134	-4.781	223.6	0.127
596	6.467	364	0.819	428	-5.996	2744	-1.767	2719	1.656	1741	3.39	132	-5.481	224.1	0.742
693	8.843	364	-2.172	428	-5.986	2734	1.331	2719	1.232	1741	4.205	130	-6.417	223.7	-0.088
686	8.496	364	-1.699	428	-7.754	2730	1.528	2722	-1.89	1741	1.84	131	-5.191	244	-0.918
664	6.829	364	-9.195	428	-5.542	2670	1.648	2722	-4.878	1741	1.84	128	-6.369	237	-0.498
676	8.022	364	-3.736	428	-6.923	2660	2.588	2722	-2.105	1741	3.98	147	-9.301	236	-0.093
574	5.53	364	-1.381	428	-6.166	2671	2.534	2722	-5.4	1741	2.677	148	-10.44	240	-0.378
696	10.334	364	-0.993	428	-7.001	2661	1.658	2722	-2.674	1732	-0.843	141	-9.195	239	0.673
599	6.707	367	-1.96	428	-7.403	2664	-0.424	2722	-3.064	1732	-0.843	147	-9.352	237	0.035
606	8.359	367	0.43	428	-7.182	2678	-0.838	2722	-1.018	1732	3.422	145	-9.186	235	-2.075
611	6.754	367	-1.279	428	-6.249	2835	1.618	2722	-2.838	1732	4.725	145	-8.227	235	-3.403
596	8.237	377	-1.014	428	-7.299	2842	1.311	2722	-1.492	1732	2.357	142	-8.054	233	-4.007
616	7.622	367	0.438	428	-7.454	2832	0.376	2722	-1.743	1732	4.725	146	-8.663	234	-4.521
606	6.541	377	-3.008	428	-8.26	2831	1.632	2722	-2.25	1732	0.252	146	-8.292	229	-2.122
616	6.607	367	-4.008	428	-8.151	2837	1.992	2722	-5.955	1732	4.609	147	-8.675	234	-1.818
608	8.677	377	-0.091	428	-5.665	2826	1.979	2722	-3.102	1732	3.422	147	-9.221	234	-3.278
615	9.279	367	-1.852	427	-5.254	2687	2.9	2722	-3.519	1732	1.525	145	-8.323	305.9	0.262
597	7.477	367	-3.439	427	-6.264	2677	1.849	2729	-0.107	1732	5.917	147	-9.332	307.7	-0.12
653	9.013	367	0.994	427	-6.093	2689	2.387	2729	-1.029	1732	6.86	161	-14.272	310.3	-0.001
613	9.542	377	-3.207	427	-5.877	2685	-0.071	2729	1.67	1733	4.981	159	-13.726	303.7	0.681
610	7.826	367	-2.276	427	-4.471	2740	2.946	2729	-0.034	1733	3.434	159	-15.64	304.7	1.35
610	6.513	377	-1.842	427	-4.918	2677	3.613	2729	-0.375	1733	-3.661	159	-14.628	311.2	1.454
618	7.114	367	-0.843	427	-3.766	2682	2.864	2729	0.865	1733	3.318	161	-14.081	312.7	-3.218
598	7.674	367	-2.531	427	-5.645	2683	2.297	2729	-0.561	1733	7.942	159	-15.801	313.2	-3.234
607	7.676	367	1.4	427	-7.956	2684	2.964	2729	-0.44	1733	2.014	159	-15.283	312.5	-2.855
571	6.618	367	2.02	427	-6.933	3294	-8.233	2729	0.482	1733	1.426	160	-15.368	312.9	-2.514
653	7.945	362	-3.384	427	-6.086	3294	-8.113	2729	0.602	1733	3.556	160	-13.644	312.1	-2.947
654	7.01	362	-3.105	427	-5.378	3294	-5.531	2729	-0.101	1733	-2.246	160	-13.898	312.2	-3.338
660	6.988	362	-3.529	427	-5.071	3294	-6.975	2729	-1.033	1733	0.949	160	-16.234	315.9	-3.487
689	7.482	362	-2.168	427	-6.416	3294	-7.482	2729	-1.785	1733	1.781	160	-13.711	312.6	-3.32
668	7.473	362	-2.376	427	-5.574	3294	-7.856	2729	-0.968	1760	2.497	160	-16.171	313.2	-3.692
661	6.634	362	-2.288	427	-4.473	1658	-0.576	2729	0.007	1760	-1.528	160	-15.518	2126	3.446
680	7.944	362	-2.877	427	-5.208	1658	-1.224	2729	-2.218	1760	0.484	134	-7.796	2124	2.832
684	7.704	362	-2.576	427	-5.133	1646	-1.385	2723	0.264	1760	1.904	133	-9.486	2122	5.217
673	7.086	362	-1.732	427	-5.459	1646	1.6	2723	0.998	1760	-2.595	133	-8.619	2135	7.533
664	7.55	362	-3.048	427	-5.47	1698	0.665	2723	0.513	1760	-1.291	133	-9.038	2140	3.521
678	7.288	362	-3.283	427	-5.169	1698	-1.009	2723	-0.662	1760	-2.832	133	-7.942	2123	6.323
673	7.688	362	-3.171	427	-5.946	1663	-1.783	2723	0.115	1760	2.023	134	-7.303	2137	4.965
675	8.296	362	-2.153	235	-7.814	1663	-2.439	2723	-0.149	1760	1.194	136	-7.907	2137	5.394
669	6.918	362	-3.13	235	-9.843	1647	-1.865	2723	-0.925	1760	1.432	136	-8.822	2129	8.469
767	4.018	362	-2.26	235	-9.659	1647	-2.891	2723	1.102	1760	1.904	134	-7.618	2086	4.457
816	8.204	362	-2.756	235	-6.844	1640	-3.425	2723	-4.705	1760	-1.412	134	-5.538	2072	5.653
806	8.476	362	-3.21	235	-11.211	1640	-1.759	2723	1.243	1760	1.549	137	-9.212	2060	5.938
809	7.304	362	-2.827	235	-2.231	1623	-4.918	2723	1.399	1766	0.736	136	-10.224	2114	5.709
724	8.268	362	-2.221	235	-8.778	1623	-3.198	2723	0.013	1766	1.678	133	-5.709	2090	4.942
678	7.324	360	-3.683	235	-5.615	1670	-3.271	2723	-2.137	1766	-15.949	135	-11.06	2064	6.015
833	6.766	360	-2.889	235	-11.36	1670	-0.764	2723	0.958	1766	0.141	133	-8.014	2102	3.564
828	6.554	100	-6.142	235	-7.43	1640	-3.771	2723	1.105	1766	0.734	134	-6.207	2067	3.107
769	8.65	689	-0.288	235	-8.209	1640	-2.61	2723	0.787	1766	2.273	130	-9.544	2083	5.425
795	8.461	360	-6.999	235	-8.313	1660	-1.992	2723	-0.302	1766	1.446	135	-3.884	2076	1.863
764	7.056	100	-6.114	235	-6.533	1697	-2.819	1959	9.047	1766	1.329	135	-4.6	2059	2.182
820	9.991	100	-5.14	235	-4.803	1732	0.218	1959	8.464	1766	1.916	133	-8.876	2118	6.054
835	10.517	100	-5.205	235	-7.056	1697	-12.129	1959	8.934	1766	-0.333	134	-8.57	2100	5.301
759	6.638	1696	-4.396	2500	2.371	1666	-5.647	1959	8.257	1766	1.087	140	-6.132	2151	4.063
823	8.625	100	-8.303	166	-3.544	1701	-5.308	1959	8.964	1766	0.968	144	-6.66	2151	7.499
797	8.204	360	-6.753	2500	3.9	1677	-2.448	1940	8.467	1760	3.088	146	-1.148	2148	6.685
795	6.984	360	-9.412	166	-7.446	1717	-1.629	1940	7.387	1760	-1.171	143	-3.995	2121	8.651
834	9.577	2277	-2.267	166	-5.351	1668	1.465	1940	8.307	1760	0.011	144	-3.354	2174	6.582
651	7.425	100	-4.149	166	-6.472	1657	0.391	1940	8.236	1760	1.549	143	-2.347	2142	4.163
639	7.266	100	-9.618	166	-6.929	1688	2.264	1940	8.015	1760	-19.988	148	-2.739	2119	3.934
630	7.311	100	-7.565	166	-4.653	1657	0.892	1907	8.977	1760	-8.271	144	-5.837	2141	3.785
623	5.968	360	-0.965	166	-4.693	1665	1.296	1907	9.126	1760	-0.461	141	-3.9	2154	6.236
641	7.815	100	-13.046	166	-5.393	1639	0.75	1907	8.74	1760	-1.763	140	-6.022	2110	4.085
627	6.215	923	3.061	166	-0.621	1666	1.99	1907	7.743	1760	-5.668	145	-4.092	2120	4.666
633	7.707	100	-7.414	166	-9.425	1662	0.887	1907	8.702	1760	-1.763	144	-6.299	2132	4.029
629	6.67	568	-3.812	166	-8.058	1652	2.218	1907	7.933	1760	-1.763	145	-4.061	2141	4.512
630	6.203	353	-5.106	166	-6.448	1660	1.397	1902	6.964	1760	-1.29	143	-4.231	2148	4.402
643	8.187	353	1.146	166	-3.075	1661	-5.746	1902	6.78	1760	-2.71	145	-3.589	2186	5.268
635	7.837	353	-1.763	166	-4.266	1707	-4.706	1902	6.858	1759	7.444	79	0.961	2112	1.043
640	8.008	1055	2.532	166	-1.718	1658	-3.551	1902	7.334	1759	9.457	80	-0.073	2120	1.533
654	6.998	353	-2.157	160	-15.525	1686	-2.868	1902	7.771	1759	7.564	81	0.639	2127	0.568
655	6.557	353	-4.193	160	-14.874	1724	-3.738	1889	7.734	1759	6.853	82.6	0.558	2132	0.016
629	6.822	353	-2.433	160	-15.79	1680	-4.639	1889	7.972	1759	6.024	80	-3.404	2141	0.543
653	7.201	353	-0.2	160	-15.506	1659	-3.992	1889	8.173	1759	6.143	81.5	-3.37	2142	1.917
660	6.315	353	-2.902	160	-16.18	1661	-4.542	1889	7.794	1759	-6.401	81.4	-0.395	2178	1.786
628	7.215	369	0.479	160	-16.167	1766	-8.083	1884	8.192	1759	7.681	80	-1.641	2041	3.774
643	5.908	369	-5.766	160	-15.026	1719	-7.999	1884	8.042	1759	6.144	80	-0.794	2071	5.083
634	5.689	369	-3.417	160	-15.681	1721	-8.28	1884	8.012	1766	7.007	80	-3.607	2085	4.705
623	4.984	369	-3.171	160	-16.514	1700	-8.893	1880	7.239	1766	5.232	78	-1.835	2094	4.783
644	5.482	369	-1.644	160	-15.272	1715	-10.289	1880	6.937	1766	7.126	77	0.971	2111	6.603
657	7.787	369	0.47	160	-16.262	1303	-1.378	1875	3.004	1766	0.379	50.9	-1.426	2137	8.079
641	6.748	369	0.486	160	-15.649	1307	-0.033	1875	5.669	1766	3.691	49	-1.245	2170	0.412
626	6.646	369	-0.135	160	-15.843	1285	-0.069	1875	6.77	1766	2.985	51.3	-1.146	2170	3.057
638	6.847	369	-4.731	160	-16.95	1302	-2.186	1875	6.995	1766	2.983	49.8	-0.716	2170	3.867
650	7.608	369	-5.279	160	-16.109	1299	-0.304	1875	7.492	1687	1.971	51.8	0.236	2170	1.171
687	11.242	369	0.76	165	-13.114	1295	-2.637	1875	6.701	1687	1.261	50.3	-0.295	2170	-11.39
704	11.427	369	-1.561	165	-12.508	1313	-1.577	1543	5.364	1687	4.541	50.4	-0.951	2170	3.685
721	6.806	3270	-0.146	165	-14.404	1306	5.969	1543	4.819	1687	4.186	59	0.107	2170	1.137
652	8.068	3067	-0.593	165	-14.715	1279	-0.918	1543	5.187	1687	1.403	58.3	0.016	2170	-14.243
725	9.8	494	-5.901	165	-13.823	1318	-2.833	1543	5.215	1687	2.212	64	0.238	2170	1.135
702	11.962	3067	-0.225	165	-13.993	1300	-1.525	1543	5.265	1687	0.111	62	-0.769	2170	1.771
702	8.816	3067	-1.794	165	-16.112	1283	-0.848	1543	4.842	1687	5.861	61.1	0.851	2170	1.402
702	10.757	3223	-3.249	165	-14.833	1317	-2.418	1543	6.97	1687	3.831	59.6	-0.309	2166	-0.556
702	9.699	3428	4.724	165	-13.934	1261	-1.195	1543	4.085	1687	4.47	62.2	0.207	2166	1.294
702	9.967	3067	-0.147	165	-12.012	1321	-2.647	1543	6.147	1687	3.121	63	-1.112	2166	2.079
652	8.156	3439	1.037	165	-14.684	1872	-7.551	1543	5.081	1687	3.845	54	10.268	2166	-3.165
616	6.407	3067	-2.261	165	-17.404	1831	-10.076	1543	5.869	1687	4.314	53.8	10.402	2166	1.146
878	8.226	3067	-1.37	165	-17.563	1873	-7.041	1543	4.112	1687	4.669	55	10.228	2166	1.146
824	8.584	3438	3.554	165	-15.004	1764	-11.445	1560	8.043	1687	3.973	54.8	9.094	2166	-0.548
712	4.858	3175	0.714	165	-15.451	1684	-12.744	1560	5.514	1687	5.024	53	9.861	2166	0.213
848	9.651	3283	-1.261	390	-10.903	1771	-13.479	1560	5.215	1405	-0.762	54.3	8.957	2166	-0.933
850	8.227	3067	-0.194	390	-10.669	1772	-12.763	1560	4.987	1405	3.068	54.8	10.075	2166	2.51
617	6.947	3425	1.029	373	-11.764	1629	-11.909	1560	4.502	1405	1.909	54.2	7.641	2166	0.995
623	7.052	3067	-0.992	382	-9	1274	-22.664	1560	6.13	1405	1.649	53	10.02	2145	2.493
845	7.467	3067	0.17	393	-8.329	1144	-23.449	1560	4.629	1405	3.423	55	9.73	2145	7.232
864	9.193	3067	-1.728	388	-9.119	1820	-8.769	1560	4.856	1405	-0.619	54	7.835	2145	-0.035
847	9.778	3283	-0.489	402	-10.319	1677	-16.608	1624	3.806	1405	2.004	55	10.965	2145	0.313
838	9.531	3067	-1.536	392	-8.781	1769	-5.554	1624	2.883	1783	-3.269	53.9	9.373	2145	1.485
805	6.517	3067	-1.071	403	-8.974	1787	-5.106	1624	2.118	1783	-4.465	54	10.094	2145	3.717
834	10.422	3067	-2	394	-10.658	1770	-5.671	1624	1.723	1783	2.177	54	10.492	2145	2.507
846	9.213	3067	-1.159	404	-9.29	1762	-5.337	1624	3.321	1783	-3.87	121	9.601	2145	2.519
759	5.859	3067	-0.907	386	-9.078	1780	-4.576	1624	3.294	1783	1.227	1686	-4.531	2145	5.292
620	7.566	3067	0.242	391	-10.444	1742	-5.144	1624	2.875	1783	-4.449	1731	-2.317	2145	2.305
627	8.153	3067	-0.341	391	-9.376	1773	-4.525	1624	7	1783	-7.071	2637	1.072	2145	2.125
614	7.256	3067	-1.122	389	-8.494	1772	-3.998	1624	4.286	1783	-0.674	431	2.289	2111	-9.656
614	7.288	3067	-2.165	281.8	11.766	1777	-3.251	1624	4.104	1783	-2.93	568	5.89	2111	-0.442
631	8.02	3067	0.184	281.8	10.85	1760	-5.235	1624	3.196	1783	-6.333	130	15.561	2111	0.401
602	7.263	3067	-1.566	281.8	10.699	1765	-3.4	1496	2.466	1783	2.068	131	15.624	2111	-0.745
612	7.764	3067	0.247	281.8	9.969	1763	0.315	1496	3.298	1783	-8.119	180	-7.658	2111	-0.347
606	7.471	3067	-0.879	281.8	9.986	1765	-1.572	1496	1.842	1783	0.637	160	-8.104	2111	-3.035
599	8.089	3067	-0.965	281.8	10.935	1788	-1.668	1496	3.367	1739	4.161	271	-16.704	2111	-0.659
607	7.829	3067	0.001	281.8	9.85	1785	-1.513	1496	3.503	1777	-0.33	1087	-2.129	2111	0.415
603	5.952	3067	-0.625	281.8	10.088	1756	-2.279	1496	2.799	1777	3.101	750	-1.747	2111	-6.436
574	7.299	1850	5.823	281.8	10.544	1791	-2.214	1496	9.258	1757	0.891	431	-12.003	2111	-0.69
610	7.425	1868	5.523	281.8	10.967	1771	-1.466	1496	4.439	1756	2.053	144	-7.989	2111	-2.559
836	10.991	1861	5.931	281.8	11.653	1265	-5.223	1496	4.138	1756	4.538	142	-8.085	2149	-4.83
755	8.068	1832	5.65	281.8	10.192	1495	-7.303	1496	4.34	1750	-0.685	148	-7.875	2149	2.508
839	10.285	1844	5.805	281.8	11.649	1320	-7.217	1584	5.066	1752	0.547	151	-8.363	2149	1.126
801	9.973	1830	4.195	281.8	11.103	1315	-7.276	1584	4.752	1761	1.568	146	-4.968	2149	1.552
838	10.685	1381	-1.998	281.8	11.119	1312	-7.515	1584	6.014	1719	1.98	146	-7.818	2149	-2.56
833	9.382	1503	-0.727	281.8	11.261	1324	-8.07	1584	5.098	1739	2.986	145	-8.18	2149	-2.067
826	7.803	1872	4.69	281.8	11.768	1312	-7.041	1584	4.526	1740	0.047	146	-8.739	2149	-4.88
736	7.667	1836	6.207	281.8	11.222	1194	-11.559	1584	4.811	1779	0.179	647	-9.225	2149	-2.436
801	11.318	1790	4.772	281.8	10.455	1241	-9.627	1584	4.31	1757	-3.016	874	-7.853	2149	0.5
691	8.114	1850	6.044	435	-3.588	1298	-8.766	1584	4.552	1737	3.168	1235	6.62	2149	-1.231
782	7.918	1870	6.651	435	-0.462	1297	-11.231	1584	3.914	1740	-0.543	1724	1.451	2149	-1.437
663	6.755	1633	4.456	435	0.308	1287	-8.627	1584	4.218	1740	6.085	85	-5.101	2171	-7.31
609	8.38	1844	4.447	435	0.77	1308	-8.996	1584	4.822	1731	0.92	87	-1.362	2462	2.224
595	7.973	1850	4.853	435	-1.47	1311	-7.95	1584	4.835	1773	-0.065	93	-3.489	2171	-3.764
643	7.256	1825	5.066	435	-0.589	1311	-9.174	1584	4.928	1731	2.112	88	0.355	2171	-0.185
716	6.942	1832	6.209	435	-1.5	1311	-8.723	1584	3.231	1770	1.054	74	-0.971	2171	-5.917
740	7.794	523	-5.135	435	-0.132	1475	4.244	2300	-6.511	1619	0.166	79	-0.271	2171	-5.028
601	8.187	531	-3.477	435	0.878	1453	4.212	1561	5.44	1619	-4.283	70	0.203	2171	-2.021
627	7.488	526	-3.49	435	0.169	1452	3.985	1561	4.378	1582	-4.32	87.1	5.757	2171	1.31
625	8.009	519	-4.758	423	-1.711	1435	3.533	1561	4.958	1582	0.435	85	2.231	2171	3.762
636	9.989	523	-4.629	423	-3.489	1414	2.534	1561	4.583	1703	0.773	220	2.819	2171	-1.008
613	9.152	527	-3.623	423	-1.977	1426	3.51	1561	4.536	1703	4.908	74	0.19	2126	-2.842
596	6.951	527	-3.512	423	-2.223	1460	5.346	1561	4.025	1800	2.208	112.4	0.147	2126	-6.839
611	7.109	527	-3.453	423	-1.958	1453	5.673	1561	5.039	2560	-2.523	108.2	1.271	2126	-6.359
600	8.949	527	-4.421	423	-1.919	1755	-9.103	1561	5.91	1800	-4.781	108.6	-0.081	2126	-4.931
609	8.318	526	-3.373	423	-3.542	1810	-6.814	1561	4.898	1800	-7.146	110.1	0.237	2126	-4.992
637	8.628	501	-4.949	423	-2.832	1814	-6.552	1561	4.623	1800	-1.231	113.3	1.34	2126	-4.627
600	9.272	520	-4.17	423	-3.723	1796	-3.927	1561	4.888	2390	-7.816	113.4	0.377	2126	-2.047
590	8.718	527	-4.538	423	-2.585	1784	-6.928	1561	4.115	2020	-3.957	114.3	-0.093	2126	-3.081
584	9.223	520	-4.575	423	-2.353	1790	-3.471	1561	5.236	2480	-1.281	110.4	-0.043	2126	-1.09
622	9.449	524	-3.515	423	-3.623	1799	-2.685	1600	3.835	1800	4.45	110.6	0.024	2126	-5.26
631	8.861	531	-3.816	423	-1.707	1781	-3.345	1600	3.4	2550	-0.268	111.9	0.555	2126	-5.169
632	6.69	535	-4.931	423	-2.512	1777	-3.022	1600	2.407	1880	-0.797	110.3	-0.188	2174	3.551
596	5.418	527	-3.938	423	-2.44	1717	-6.423	1600	2.711	2540	-0.303	112.5	0.983	2174	0.308
659	7.281	510	-4.156	423	-1.902	1804	-7.703	1600	2.065	2350	0.63	110.7	3.127	2174	3.106
603	5.602	531	-3.41	423	-3.768	1800	-7.335	1600	2.709	1800	-3.231	109.5	3.38	2174	-0.017
605	5.351	525	-4.999	446	0.263	1801	-8.045	1600	3.821	1890	6.935	123	-7.956	2174	0.989
610	5.835	492	-4.934	446	1.396	1795	-8.424	1600	3.796	1910	-5.661	123.4	-8.607	2174	3.908
615	5.166	527	-3.694	446	0.212	1809	-7.805	1600	3.879	1910	0.537	120	-7.847	2174	3.09
618	6.068	527	-3.736	446	-2.454	1799	-8.004	1600	3.486	1800	-3.249	122.5	-6.375	2174	1.3
605	5.883	527	-5.275	446	4.061	1794	-8.609	1600	3.216	1920	-2.305	120	-7.075	2174	2.017
602	5.682	1065	4.288	446	4.084	1786	-8.441	1600	3.22	1800	-1.006	122.5	-6.563	2174	1.36
611	5.237	1046	4.427	446	2.661	1772	-11.353	1600	2.363	1840	5.553	120.1	-8.085	2174	4.114
614	5.664	1093	4.225	446	0.565	1806	-3.572	1343	3.622	1820	0.73	123	-9.76	2117	-3.026
617	4.985	1055	2.945	446	0.315	1797	-5.051	1343	3.65	1800	-10.454	121.2	-8.163	2117	-4.521
622	6.118	1072	4.932	446	3.837	1788	-6.359	1343	3.878	1800	-2.426	121.2	-6.685	2117	-4.889
626	7.129	1063	7.558	2491	-1.41	1760	-6.649	1343	3.773	1890	-1.916	117.5	-7.814	2117	-2.614
613	6.407	1036	7.567	2520	2.053	1727	-7.63	1343	3.952	2600	-1.614	121.3	-7.521	2117	-7.151
789	9.717	599	2.355	2323	-1.396	1612	-7.539	1343	2.842	1800	-0.997	119.4	-8.567	2117	-6.492
777	9.02	605	3.598	2439	2.419	1765	-7.248	1343	3.318	2560	-2.69	122.6	-7.303	2117	-9.647
776	8.242	1037	5.56	2506	2.609	1703	-8.133	1343	3.724	2200	-10.132	119.9	-7.21	2117	-5.684
758	8.008	1041	4.044	1178	-6.133	1786	-5.412	1343	3.52	1830	9.194	123.3	-6.167	2106	1.273
799	8.684	1068	4.91	2527	2.847	1754	-6.431	1343	4.747	1800	-2.408	131.3	-8.087	2106	0.341
773	8.974	1085	5.285	2473	4.018	1739	-7.223	1343	2.513	1800	1.255	127.2	-4.813	2106	-1.618
792	9.859	1061	6.664	2473	1.471	1717	-7.331	1640	3.72	1820	0.156	132	-7.989	2106	-1.24
801	9.451	1068	5.58	125	-20.921	1778	-4.537	1640	5.094	1840	-0.394	127	-8.221	2106	-0.54
770	9.254	1073	5.811	111	-27.635	1877	-4.677	1640	3.55	1800	-5.613	131.2	-5.927	2106	-11.237
785	9.905	1026	7.425	138	-24.646	1790	-6.699	1640	4.299	1860	-0.712	130.7	-6.049	2106	0.1
821	9.503	1059	6.558	125	-41.119	2102	-5.603	1640	4.445	2590	2.431	129.1	-6.311	2106	-1.449
799	8.096	527	-2.334	100	-28.782	1715	-8.534	1640	4.629	1800	-5.024	127.6	-7.953	2106	0.079
793	7.824	527	-4.139	120	-22.394	1756	-8.758	1640	5.209	1800	-1.595	131.2	-7.323	2106	1.238
812	9.063	527	-5.634	121	-20.431	1807	-6.085	1640	5.434	1800	0.527	130.1	-9.511	2165	3.852
608	6.757	514	-3.663	126	-23.31	1723	-10.601	1640	4.396	1800	5.862	129.2	-5.641	2165	2.517
764	7.962	537	-3.197	118	-19.891	1790	-11.944	1640	4.931	3290	0.601	128.1	-7.648	2165	1.027
722	7.207	531	-5.088	131	-21.087	1809	-7.531	1586	2.282	1830	3.233	128	-7.145	2165	0.557
848	-8.654	531	-4.27	131	-20.973	1810	-6.654	1586	4.369	1800	-3.231	130.1	-8.521	2165	-1.392
698	-8.617	527	-3.297	129	-21.952	1928	-11.905	1586	2.707	1800	-1.473	130.5	-6.694	2165	3.193
1752	-3.34	516	-4.159	121	-25.481	1794	-6.983	1586	3.779	1800	9.403	133.3	-10.318	2165	-0.194
689	-9.545	535	-3.534	116	-18.979	1785	-5.519	1586	2.289	2280	3.354	130	-5.24	2165	3.752
647	-10.735	518	-3.801	115	-22.725	1755	-8.273	1586	3.939	1800	0.32	106.9	1.232	2165	0.714
610	6.347	3150	-4.004	120	-21.913	2327	2.08	1586	5.255	1900	-8.182	109	0.987	2165	0.258
596	6.571	3150	-2.936	162	-19.033	1784	-5.614	1586	3.144	1960	-1.048	108.5	0.239	2165	-0.935
609	6.202	3150	-0.799	121	-23.584	1746	-8.308	1586	2.724	1960	-6.815	105	0.302	2131	3.03
773	6.999	2200	5.028	2339	-2.273	1749	-7.3	1586	2.856	2170	0.014	108.8	1.943	2131	-0.355
603	7.916	2200	-6.345	2481	7.704	1778	-7.861	1586	2.979	1870	-1.782	108.5	2.128	2131	-2.271
600	6.086	908	-3.027	2276	6.032	1792	-9.473	1568	4.968	1800	-1.118	105.6	0.76	2131	-5.473
599	6.528	914	-3.463	118	-18.648	1977	-1.329	1568	6.265	1800	-3.37	103.9	3.006	2131	-2.144
596	6.204	921	-3.673	111	-20.561	1811	-5.12	1568	4.685	2620	2.925	106.2	1.357	2131	-3.135
603	7.548	948	-1.869	194	6.478	1963	-0.764	1568	4.345	2350	-0.865	108.4	1.377	2131	-2.113
593	7.237	957	-2.677	119	-22.395	1797	-7.403	1568	4.101	1970	2.686	105.8	1.624	2131	-4.681
588	6.618	964	-2.775	118	-20.862	1816	-6.596	1568	3.967	1940	-2.51	101.4	-0.969	2131	-4.235
614	6.453	975	-2.041	120	-15.849	1972	-1.828	1628	4.969	2380	-7.138	108.9	1.881	2131	-2.539
615	6.203	978	-1.055	126	-21.553	1780	-9.434	1628	4.429	1800	-2.278	108.4	0.702	2131	-3.755
620	6.717	1004	-2.114	125	-20.75	1974	-0.057	1628	3.739	1800	-8.489	106.7	1.09	2130	-10.627
601	7.009	1314	8.704	124	-20.113	1975	-3.146	1628	5.146	1800	-1.379	112.9	-3.208	2130	-5.389
619	6.949	957.8	-9.654	155	-15.665	1975	0.728	1628	3.437	2310	-2.833	112.8	-2.265	2130	-2.896
600	8.956	946.3	-7.891	118	-21.84	1932	-1.433	1628	4.061	2310	0.168	109.1	-1.663	2130	-3.264
590	7.33	984.1	-8.788	113	-13.406	1980	0.738	1628	2.454	1800	-0.071	116.8	-2.186	2130	-5.616
644	7.893	926.6	-9.992	121	-22.371	1958	-0.87	1496	7.093	1810	-4.104	112.9	-4.59	2130	-6.426
616	9.1	964.2	-8.872	115	-19.323	1937	-1.302	1496	6.627	1810	0.068	111.9	-3.875	2130	-1.198
616	7.217	986.8	-9.442	122	-22.648	1810	-5.575	1496	6.077	1810	-4.104	107.5	-3.27	2130	-6.726
611	7.067	948.7	-10.062	120	-16.86	1760	-7.292	1496	9.777	1870	6.386	110.8	-2.205	2130	-4.203
555	6.921	953.3	-9.687	117	-21.169	1763	-5.446	1496	3.58	1960	-6.021	111	-2.846	2130	-3.599
502	6.906	815.2	-12.513	191	-19.712	1775	-7.841	1496	4.343	1960	-6.502	108.4	-3.5	2130	-3.005
619	8.498	1166	-5.144	2494	1.143	1752	-8.506	1496	5.226	1880	-19.061	109.2	-1.447	279.7	-1.146
597	8.265	692.1	-13.668	2470	1.545	1788	-7.52	1496	6.417	1890	-1.716	106.6	0.191	287.3	-0.381
593	8.358	889.1	-3.241	2492	2.019	1741	-9.74	1496	5.964	1960	-7.309	115.3	-5.378	275.8	0.811
587	8.321	907.1	-2.26	2567	2.114	1802	-6.765	1496	4.266	2440	4.366	120	-12.94	282.5	0.536
604	7.092	930.9	-3.908	2456	3.904	1794	-7.87	3225	-1.735	1840	-0.449	122	-12.192	284.2	0.546
593	8.547	982.4	-3.587	2469	2.181	1741	-8.146	3231	-2.636	1840	-4.124	122	-12.519	283.3	0.768
2042	-4.919	1080.6	-0.675	2509	2.91	1746	-8.987	3204	-3.682	1810	-2.063	123	-12.579	289.8	1.14
609	7.365	1083.9	0.571	891	-15.518	1682	-8.974	3285	0.78	2520	0.484	122	-12.611	276	-5.157
630	8.208	1045.9	-5.302	2459	6.203	1785	-6.933	3326	1.341	1880	-0.264	123	-12.594	285.6	1.441
628	7.195	1056.9	-2.451	1832	-5.381	1784	-7.478	3210	-2.914	2640	-3.197	123	-12.896	281.3	0.625
638	8.46	1084.2	-3.396	2512	-2.601	1768	-7.03	3198	-1.67	1880	0.421	124	-12.646	280.5	1.195
603	6.784	1104.7	2.458	1087	-2.633	1771	-6.804	3170	-2.456	1880	-5.21	123	-12.638	286.4	1.702
598	7.617	1144.2	0.702	2568	6.98	1793	-5.727	3223	-0.206	1880	-0.594	124	-13.079	221	-0.748
611	7.058	1150	-1.379	924	7.423	1780	-7.204	3315	0.157	1860	1.459	121	-13.161	393.5	0.713
613	7.437	1250.9	-1.823	448	-5.424	1796	-6.375	3315	2.59	2520	-2.177	120	-13.247	403.2	-0.038
612	7.037	1280.5	-3.635	419	-4.532	1817	-7.196	2718	-0.116	1960	-4.642	122	-13.296	401.6	1.535
609	7.465	1300.4	-2.295	461	-4.716	1781	-9.007	2718	-2.183	1960	-7.574	122	-13.405	395	-0.426
606	6.922	1333.2	3.848	461	-5.321	1792	-3.927	2718	0.254	1960	-3.041	110.6	-3.541	398.1	-1.269
602	7.192	1406.2	-2.102	488	-0.823	1786	-6.394	2718	-0.983	1960	1.041	108.8	-5.297	393.9	-1.304
614	7.941	1536.4	11.261	460	-7.31	1785	-6.921	2718	-2.321	1960	-3.577	108	-2.146	388.4	-1.686
603	7.572	1615.3	-1.125	459	-3.743	1784	-4.605	2718	-0.65	1880	-2.623	107.5	-6.242	388.6	-1.179
600	6.741	1985.6	7.387	480	-6.379	1766	-5.45	2718	-1.505	1800	-1.24	109.5	-4.209	380.9	0.15
596	7.106	2487.9	-12.895	484	-4.498	1799	-5.617	2718	-0.661	1840	-0.714	108	-5.303	387.5	-2.113
612	7.113	2522.4	2.148	461	-3.502	1761	-4.868	2718	-2.452	2070	-0.049	108.2	-5.6	368.8	-3.319
611	9.325	908.5	-0.308	471	-6.777	1748	-7.797	2718	-2.13	1800	6.122	109	-2.799	391.5	-0.662
585	7.066	956.2	-0.947	467	-5.549	1795	-7.697	2663	2.637	1800	-3.959	108.2	-4.421	292.7	0.078
618	7.348	1012.2	0.127	468	-6.115	1764	-5.546	2663	3.141	1800	-1.361	114.1	-5.093	296.3	-1.533
617	6.549	992.9	-0.636	482	-1.014	1770	-6.881	2663	2.993	1800	-9.91	113.1	-5.424	292.3	-0.65
615	7.434	1054.4	-0.893	113	-18.535	1785	-4.99	2663	2.251	1800	-7.024	113.1	-3.888	294.4	-1.955
642	9.022	1072.2	-3.899	120	-24.287	1883	-3.377	2663	1.932	1800	-0.763	110.9	-1.492	287	-2.456
641	8.025	1094.5	-2.368	111	-19.342	1805	-5.879	2663	-0.265	1800	-5.042	108.2	-0.994	295.3	-1.76
642	8.681	1115	-1.979	118	-18.978	1761	-6.325	2663	1.379	1800	-6.584	109.5	-4.315	457.1	1.749
652	9.039	1132.3	-2.94	120	-21.423	1745	-8.346	2663	0.99	1800	-8.098	108.8	-6.814	285.9	-1.888
601	7.246	1167.1	-2.757	120	-19.644	1915	-3.944	2663	1.339	1800	-1.361	106.8	-0.67	290.5	0.504
616	9.234	1182.3	-4.385	120	-21.565	2422	4.032	2663	4.848	1800	-2.66	109.2	-0.305	288.1	0.118
540	8.062	1314.7	-0.648	118	-23.856	1806	-6.902	1777	6	1800	-3.474	112	-3.361	294.6	-1.15
537	6.57	1395.8	-5.196	122	-21.798	1994	-1.937	1777	4.678	1800	-0.651	107	-2.31	288.1	0.136
619	8.31	1406.4	5.508	121	-19.447	1767	-4.909	1777	6.105	1800	-1.829	106.6	-3.102	271.5	-1.952
634	7.648	1439.7	-5.366	127	-19.28	2078	-0.314	1777	5.221	1800	-0.754	106.1	-0.227	290	-1.286
608	7.447	1490.3	-9.681	120	-20.317	1856	-6.992	1777	5.794	1800	-5.995	104.5	-5.097	295.2	-0.765
626	6.585	1741.4	-6.881	167	-17.64	2192	-0.977	1786	2.242	1800	-3.856	115.3	-3.112	295.5	0.569
619	6.51	1792.5	-3.46	122	-23.827	1759	-7.255	1786	1.683	1800	0.545	117	-5.703	292.7	-2.754
601	6.64	2078.4	3.259	126	-21.647	2433	-0.555	1786	2.052	1800	-5.752	113	-5.736	292.3	-1.612
614	6.798	2099.2	4.66	117	-20.827	1774	-4.294	1786	1.937	1800	-0.053	115	-4.637	271.3	1.289
611	6.038	2650.4	-1.445	128	-21.741	2005	-2.792	1788	1.548	1800	-5.042	115	-3.454	292.8	-1.604
617	7.415	992	9.084	124	-23.885	2295	-1.533	3659	-0.572	1900	-8.083	112	-6.763	293.7	-1.968
615	6.727	992	8.418	125	-12.725	2264	-5.59	3356	-7.755	1800	-8.323	118	-3.297	303.6	-1.931
672	7.603	992	6.087	123	-22.647	2258	-9.147	3451	-4.598	1800	-1.109	119	-7.117	290	-1.371
617	7.155	992	5.718	129	-20.869	2174	-4.774	2960	-17.084	1800	-4.089	118	-3.109	302.2	-0.44
601	6.722	992	7.584	1793	-11.379	2094	-4.149	3558	-5.759	1800	-1.473	116	-3.032	286.6	-2.297
619	7.306	992	7.873	2386	1.587	2082	-3.135	2374	-33.443	1800	-7.312	117	-3.706	287.5	-4.08
604	6.697	992	6.637	2477	2.986	2081	-5.422	2374	-33.092	1800	-0.287	118	-6.068	298	-3.314
619	6.101	992	7.376	2422	2.037	2047	-6.815	3535	-0.234	1800	0.432	116	-3.873	301.7	-1.457
605	7.388	992	9.196	2285	-0.707	2044	-4.599	3330	-10.558	1800	0.311	151	-3.56	286.2	-2.548
604	6.895	992	6.413	2315	1.317	2036	-6.583	2447	-18.23	1800	-0.503	154	-2.363	283	-1.015
601	7.545	992	7.276	2470	3.15	2035	-6.085	3246	-10.22	1800	-0.642	152	-2.339	291.4	-2.994
2732	0.323	992	7.651	2329	0.273	2024	-5.098	2790	-20.903	1800	-5.64	153	-2.512	303.8	-3.026
2734	-0.968	992	5.421	1341	-17.721	2019	-7.055	3423	-5.885	1800	-5.959	153	-3.018	287.8	-2.061
2731	1.276	992	7.208	2365	-0.141	2019	-7.323	3331	-7.957	1800	-3.847	152	-4.436	285	-3.797
2718	-0.224	992	7.982	2364	0.809	2226	-6.749	3488	-5.155	1040	-5.911	151	-3.638	275.4	-4.886
2701	-0.168	992	5.781	2409	1.024	2209	-7.537	3571	-1.579	1040	3.02	154	-3.998	291.2	-1.375
2752	0.349	992	8.125	2417	2.059	2113	-2.828	3581	-5.033	1090	0.218	151	1.852	316.3	-1.189
2732	0.448	992	7.44	2366	1.416	2093	-2.69	3583	-5.828	1150	4.219	51.4	2.626	272	-3.987
2721	1.159	992	8.315	2432	1.863	2081	-6.414	2912	-21.1	1150	-4.691	51	3.045	267.8	-3.13
2749	-0.289	992	7.118	2487	3.569	2072	-5.7	2392	-32.434	1160	3.097	51.8	2.873	284.9	0.635
2714	2.207	992	7.037	2362	-0.778	2071	-2.486	3333	-9.789	1220	4.686	51.1	2.202	285.5	-1.158
2724	0.664	992	7.012	2504	4.093	2066	-4.433	3122	-14.692	1230	6.76	51.4	-0.586	287.6	0.167
2730	1.151	992	7.092	2503	3.033	2064	-8.576	3618	-1.598	1370	3.18	51.7	1.909	291	-0.937
2732	0.46	992	7.394	2415	1.344	2049	-6.039	2584	-20.23	1380	0.899	51.7	2.3	288.4	-0.127
2726	-0.235	992	8.199	2442	3.734	2047	-10.163	2499	-23.86	1390	-1.182	52	2.719	283.1	-0.493
2714	0.203	992	8.516	1820	-9.985	2046	-7.118	2084	-31.804	1150	8.504	51.8	1.252	286.2	-0.984
2737	0.798	1016	6.901	2415	2.55	2042	-5.959	2952	-9.737	1390	4.699	52.4	1.439	289.7	-0.914
2733	-0.124	1016	5.737	2436	1.876	2012	-5.672	2879	-10.164	1440	2.708	51	-1.386	291.1	-1.151
2738	0.06	1016	7.722	2367	2.541	1998	-8.064	343	2.379	1450	6.541	51.2	-0.284	290.8	-2.305
2665	-1.003	1016	9.598	2107	-8.799	2024	-2.8	447	13.248	1470	3.787	51.9	0.57	286.7	-1.159
2826	2.222	1016	7.856	1872	-1.938	2012	-3.594	457	14.874	1470	0.141	52	0.156	290	-0.826
2826	0.692	1016	9.751	1847	-0.97	2011	-2.22	537	5.309	1490	1.143	51.1	1.222	291.2	-2.109
2826	1.591	1016	8.134	1825	-2.941	2008	-3.654	567	-1.194	1610	5.543	51.5	0.413	293.4	-0.949
2755	0.538	1016	7.042	1876	-6.591	2008	-1.813	573	1.399	1620	0.023	51	-1.92	286.6	-1.977
2736	0.03	1016	3.119	1966	-8.04	2006	-3.184	653	2.538	1630	4.881	51	1.977	284.9	-1.399
2745	0.636	1016	7.656	1842	-3.609	2004	-3.27	972	3.263	1690	7.689	52	3.451	288.8	-1.686
2729	-0.289	1016	6.021	2194	1.519	2002	-4.265	1517	-16.093	1690	7.83	52	-1.473	254.4	1.573
2744	-0.264	1016	9.062	1857	-4.662	2001	-2.959	2065	6.312	1690	5.499	49.8	-1.412	223.7	2.616
2760	0.733	1016	7.752	1802	-5.596	2001	-3.401	356.1	6.839	1720	1.131	51	-1.607	253.8	1.438
2742	1.218	1016	8.732	1820	-4.273	2000	-3.108	343	13.463	1730	7.395	49	-1.606	256.9	1.723
2834	-0.143	1016	5.285	1852	-3.209	1998	-6.033	419.9	12.681	1770	0.356	49.4	-1.664	256.1	2.223
2834	0.477	1016	8.578	2250	-4.073	1995	-2.27	432.5	12.261	1800	2.554	49.3	-1.591	255.3	2.066
2834	1.032	1016	7.412	1845	-5.05	1993	-1.794	433.1	10.385	1800	0.657	50.8	1.213	254.6	3.008
2752	0.242	1016	6.68	1840	-3.334	1990	-3.798	462	12.06	1800	9.282	50.7	-1.782	259.4	0.981
2743	-0.415	1016	5.753	1808	-2.617	1981	-4.698	470.6	13.075	1810	-2.795	50	0.293	258.5	1.977
2726	-0.472	1016	5.423	1846	-1.241	2039	-4.326	495	13.312	1820	9.252	52	0.74	251	1.62
2798	1.125	1016	5.89	2018	-1.149	2010	-4.649	496.5	12.049	1820	8.581	52	0.789	257.6	2.258
2798	0.02	1016	5.109	1828	-2.908	2009	-0.814	694	-3.229	1840	8.36	50	1.064	248.8	3.017
2762	0.936	1016	7.643	1836	-0.833	2007	-2.288	433	11.71	1840	9.246	50.4	1.145	254.4	3.643
2841	0.696	1016	4.101	1824	-1.466	2006	-1.904	449	9.635	2680	2.696	50.3	0.668	255.8	3.043
2841	1.774	1016	7.089	1795	-4.142	2006	-5.788	453	13.658	2740	3.152	49.4	0.411	212.4	2.332
2729	-1.172	1016	8.154	1935	-9.305	2005	-0.211	1631	-10.341	3360	1.394	49	0.407	251.7	2.517
2788	0.335	1016	7.641	1822	-2.724	2002	-3.297	1691	-9.687	950	-4.346	50	1.276	253.7	3.766
2849	1.945	1016	5.596	1895	-0.896	2002	-2.974	1713	-12.798	1080	5.513	49.4	0.906	256.1	4.009
2841	1.919	1016	7.373	302	-18.338	2001	-3.352	2827	-0.882	1390	4.419	50.7	0.086	226.4	3.926
2805	1.9	1006	7.256	330	-18.697	2000	-3.047	2824	-2.167	1400	4.21	50.1	0.238	222.2	4.849
2805	-0.203	1006	8.686	264	-4.139	1999	-4.475	2856	1.975	1400	4.471	52	-1.658	224.9	5.956
2805	1.049	1006	3.32	353	-12.662	1992	-6.185	2846	-0.789	1410	3.367	52.2	-1.452	218.8	7.232
2754	0.219	1006	7.986	293	-20.839	1990	-4.722	2845	0.965	1420	-14.15	52	-0.803	232.5	6.43
2754	0.13	1006	7.07	314	-2.441	1979	-4.67	2865	1.684	1420	3.588	51.8	3.971	222.9	6.742
2809	2.05	1006	10.544	315	-7.886	2004	-2.994	2842	4.179	1430	4.135	54	3.028	224.1	4.715
2809	2.078	1006	8.741	303	-3.262	2002	-0.691	2853	1.597	1440	5.353	51.4	1.412	226.7	6.593
2833	2.579	1006	8.909	299	-3.076	1997	-1.165	2831	5.479	1440	6.063	51.2	-1.511	231.6	5.364
2833	1.273	1006	7.522	297	-19.463	1989	-3.093	2856	3.316	1460	7.727	51.4	-0.962	227.6	5.85
2756	0.661	1006	7.422	293	-20.668	1986	-0.598	2877	2.131	1710	7.201	52.5	0.424	236.3	2.144
2852	2.56	1006	8.613	295	-20.47	1986	0.632	2874	4.044	1720	0.776	51.9	0.117	223.3	3.171
2842	1.514	1006	6.942	300	-14.954	1986	-1.518	2844	3.254	1720	9.187	51	-0.113	227.9	3.254
2842	1.53	1006	6.503	284	-20.217	1985	-1.927	2813	1.099	1750	-5.65	51.3	-0.502	224.9	6.693
2842	0.636	1006	8.746	292	-9.67	1985	-0.034	2814	1.794	1760	8.887	51.5	-0.422	231.4	4.713
2809	1.677	1006	8.478	295	-7.614	1981	7.56	2809	-0.267	1760	-0.698	52	2.023	226.5	7.238
2831	0.711	1006	10.695	308	-17.341	1981	-0.563	2801	-3.072	1760	1.077	51	-1.578	221.7	5.604
2738	0.835	1006	7.054	304	-5.522	1977	-1.859	2773	-1.33	1780	-1.21	45.3	-0.919	222.5	5.211
2736	0.596	1006	7.196	269	-7.874	1975	-0.355	2761	-0.743	1790	3.277	44.1	-1.365	221.1	8.498
2748	0.269	1006	9.018	300	-4.354	1975	1.499	2772	-1.128	1810	3.374	43.2	1.565	220.3	5.028
2735	-0.009	1006	9.678	350	-4.149	1972	-1.071	2841	2.448	2720	1.105	43.4	4.6	225.5	5.144
2747	0.635	1006	9.582	271	-1.836	2023	-5.647	2853	2.937	2930	2.528	44.6	-0.28	227.8	9.663
2744	1.068	1006	8.518	308	-6.927	2016	-11.307	2843	2.505	2030	-25.926	44.2	0.585	223.3	4.029
2754	0.412	1006	10.164	301	-8.911	2014	-5.82	2858	2.95	990	6.111	44	-1.566	220.8	3.977
2763	1.774	1006	8.162	321	-21.713	2013	-8.861	2839	3.2	1000	5.42	43.5	0.407	216.8	3.023
2765	1.6	1006	7.005	300	-3.238	2012	-5.045	2844	0.102	1010	4.152	43.6	-0.311	219.8	2.25
2699	-0.035	1006	4.36	304	-6.026	2008	-10.091	2857	0.09	1030	6.129	969	5.499	202.1	4.986
2762	0.831	987	6.49	319	-13.688	2005	-6.098	2852	0.681	1040	5.926	88	12.094	220.8	6.33
2758	-2.246	987	6.712	289	-3.569	2003	-5.724	2846	0.244	1050	4.587	92	12.429	220.7	5.42
2774	2.123	987	7.275	308	-10.961	2002	-9.914	2835	2.166	1060	-1.929	88	12.168	227.1	6.836
2706	-0.735	987	7.183	403	-11.194	2000	-5.015	2830	0.963	1070	4.882	89	12.558	220.2	5.054
2748	0.524	987	5.985	387	-17.132	1997	-5.755	2810	1.026	1070	2.752	89	12.015	226.2	3.148
2783	1.862	987	6.52	297	-6.313	1995	-6.306	2698	-1.499	1090	5.536	91	12.883	222.1	3.712
2936	3.939	987	7.634	327	-12.765	1986	-7.655	2694	-0.395	1090	5.122	85	11.602	212.4	3.569
2974	4.65	987	7.077	306	-18.39	1986	-7.513	2848	2.625	1110	3.922	90	12.971	216.7	5.404
2988	4.814	987	7.779	302	13.158	1982	-5.15	2883	3.71	1110	8.886	85	12.234	218.1	3.33
2959	4.051	987	7.377	252	13.505	1984	0.223	2883	-0.144	1120	4.382	86	11.271	214.9	2.791
2653	0.875	987	5.789	283	14.044	1982	-4.305	2838	-0.741	1120	9.74	84	12.316	218.8	2.868
2959	4.345	987	8.772	287	14.847	1981	-2.7	2841	-0.862	1140	5.293	90	11.366	216.2	3.271
2956	5.87	987	5.061	287	15.125	1979	-4.805	2826	0.206	1140	7.622	87	12.19	217.9	3.381
2800	3.089	987	6.648	284	14.079	1977	-3.926	2762	-3.069	1190	6.237	85	13.286	214.9	4.775
2801	1.895	987	7.085	278	14.001	1976	-3.698	2755	-3.553	1210	6.595	111	11.621	214.9	3.834
2928	3.94	987	7.854	300	15.05	1975	-4.01	2776	-1.795	1220	7.413	107	14.137	215.9	3.518
2401	-6.452	987	8.405	306	15.48	1972	-3.316	2764	-2.884	1250	6.407	107	13.594	212.5	3.129
2293	-9.809	987	7.194	380	15.008	1968	-2.568	2748	-1.314	1250	6.929	106	13.973	214.5	3.299
2229	-9.03	987	6.765	291	13.669	1968	-4.496	2752	0.201	1290	9.134	109	13.893	220	4.014
2269	-9.212	987	7.146	270	7.474	1967	-3.44	2769	-2.377	1340	5.368	109	13.217	217.5	2.931
2967	4.361	958	8.036	296	2.487	1962	-5.111	2735	-3.284	1340	5.543	109	12.669	211.6	5.579
2965	4.403	958	8.036	281	15.844	1959	-2.909	2740	-1.814	1350	7.091	108	13.432	213.8	3.402
2972	4.936	958	7.345	307	14.409	1956	-6.596	343	2.379	1360	5.272	107	14.358	213.9	2.718
2899	3.411	1000	7.074	2508	5.899	1955	-3.393	447	13.248	1360	5.364	109	12.474	218.9	1.713
2821	1.65	1000	8.062	2542	2.861	2026	-4.287	457	14.874	1370	5.584	110	12.54	220.2	2.67
2949	5.766	3005	3.684	2537	7.489	2024	-2.502	537	5.309	1370	5.939	109	13.392	212.6	2.179
2781	1.095	958	8.043	2481	7.908	1999	-6.689	567	-1.194	1370	6.385	108	13.081	213.9	3.257
2978	4.647	958	9.199	2496	2.302	1991	-4.403	573	1.399	1370	7.712	107	12.123	214.1	1.359
2951	4.499	1000	9.036	2503	6.902	1985	-2.149	653	2.538	1380	7.223	114	13.883	215	2.9
2768	0.933	1000	8.293	2510	4.974	1979	-3.105	972	3.263	1380	5.542	112	12.709	214.1	1.384
2904	3.088	958	7.225	2510	6.508	1978	-5.244	1517	-16.093	1380	7.223	112	13.963	211.6	3.093
2953	4.351	958	8.104	2532	7.366	1978	-4.689	2065	6.312	1390	-0.379	110	14.052	221.1	2.052
2941	4.703	958	8.365	2530	6.11	1977	-2.918	356.1	6.839	1390	11.793	103	12.868	214.7	2.602
806	13.048	958	9.165	2541	3.945	1975	-9.219	343	13.463	1390	11.047	110	11.784	213.3	2.721
738	7.959	958	6.629	2534	5.846	1974	-3.284	419.9	12.681	1390	5.67	88	13.673	216.7	0.682
584	-35.017	958	8.084	2538	6.278	1973	-3.004	432.5	12.261	1400	6.245	89	13.888	466	-1.178
477	-23.169	958	8.151	2535	5.895	1972	-7.051	433.1	10.385	1400	4.471	89	13.399	466	-4.116
859	-26.237	958	8.364	2547	1.806	1966	-2.146	422	11.744	1410	8.948	87	13.331	466	-3.624
641	-17.105	958	9.277	2559	5.188	1965	-5.214	424	7.566	1440	6.514	90	14.036	489	-10.347
797	-16.075	958	8.85	2540	5.913	1741	-6.204	417	7.253	1450	7.09	84	14.482	489	-13.531
1360	9.006	958	7.135	2533	4.872	1747	-5.409	409	5.102	1450	6.541	89	13.553	489	-18.409
1360	7.855	958	9.911	2546	7.294	1759	-5.938	391	7.915	1460	5.794	88	12.404	489	-15.377
2488	-4.387	958	8.043	2558	6.988	1762	-3.563	404	5.062	1460	7.078	87	13.22	489	-11.284
734	-17.782	958	7.392	2549	2.467	1763	-8.442	411	7.49	1470	6.567	84	14.456	464	-5.813
740	-16.173	958	10.954	2533	6.58	1763	-5.201	423	8.347	1490	6.811	86	14.709	464	-4.106
798	-15.597	958	6.926	2545	3.821	1769	-4.3	417	7.44	1490	7.166	90	13.829	464	-6.591
798	-15.219	958	2.062	2546	5.792	1772	-6.987	382	3.64	1490	8.231	85	12.866	464	-5.324
2060	-17.991	947	8.764	2542	5.4	1775	-4.996	390	2.111	1490	7.375	91	15.295	464	-4.33
1039	11.096	947	7.574	2562	6.252	1776	-5.283	363	6.831	1520	9.807	198	16.074	464	-5.413
633	-6.286	947	8.448	2549	3.909	1781	-7.743	282	6.357	1630	5.43	201	15.18	464	-4.348
591	-3.628	947	8.539	2535	2.825	1787	-5.637	328	2.875	1650	7.29	206	14.784	464	-3.788
731	-4.177	947	8.903	2545	2.143	1796	-3.908	347	0.959	1680	0.367	203	16.174	464	-8.475
731	-3.078	947	8.538	2550	6.743	1841	-4.156	276	6.417	1720	6.34	212	14.001	476	-8.448
741	-4.097	947	10.167	2543	4.571	1883	-3.811	418	3.519	1720	9.52	211	14.383	476	-6.122
805	-7.964	947	10.101	2539	0.132	1889	-1.278	320	1.573	1750	8.191	208	13.555	476	-7.881
633	5.605	947	7.907	2555	-2.739	1949	-0.464	279	2.047	1830	5.734	196	14.03	476	-7.334
926	-16.043	947	8.564	2545	6.356	2162	0.076	254	2.453	1860	9.002	204	12.312	476	-7.319
819	-5.256	947	8.49	2539	5.235	2306	0.207	1800	3.611	2450	-8.142	210	14.612	476	-5.085
819	-3.41	947	8.154	2553	7.584	2488	5.983	1800	3.568	1230	2.151	198	14.692	476	-8.527
1029	1.057	947	7.535	2511	6.866	1664	-0.738	1800	3.267	1030	10.984	209	14.059	476	-4.821
805	10.938	947	8.055	2544	6.195	1671	-0.565	1800	4.593	1450	6.93	209	14.676	372	-6.171
646	6.896	947	9.129	2562	7.14	1675	0.019	1800	3.941	1180	-3.556	198	14.512	372	-2.945
659	6.57	947	7.706	2532	5.831	1679	-5.227	1800	3.277	1840	2.854	202	14.147	372	-4.199
790	-12.662	947	8.007	2545	6.295	1680	-1.362	1800	3.538	1220	7.768	188	15.53	372	-2.261
1006	0.286	947	7.789	2531	7.278	1685	-0.216	1800	3.904	1230	2.835	183	14.48	372	-2.518
628	-2.391	947	10.402	2501	5.229	1688	-0.297	1800	4.207	1370	7.712	205	15.438	372	-1.653
621	4.7	947	7.931	2533	4.665	1688	-6.51	1800	4.489	1810	-3.738	187	13.803	372	-3.211
627	7.497	947	9.105	2517	4.862	1689	0.487	1800	3.195	1830	0.023	190	16.18	369	-4.387
785	-17.311	947	9.778	2514	6.115	1690	0.322	1800	3.826	2590	2.245	199	14.832	369	-3.499
2710	3.464	947	7.428	2529	7.081	1692	-2.809	1800	4.138	2570	0.181	191	15.55	369	-8.447
1935	-17.714	947	6.594	2545	6.492	1696	-0.022	1800	3.548	1370	7.082	190	14.916	369	-6.168
2020	-10.855	947	8.953	2541	7.375	1700	4.837	1800	3.638	1960	-3.305	203	15.699	369	-5.812
2505	-4.457	947	8.949	2525	8.067	1706	-2.803	1800	3.694	1430	8.747	201	14.337	369	-4.685
2351	-4.314	947	8.483	795	-27.173	1707	-0.592	1800	3.275	1250	-23.239	190	15.85	369	-6.43
730	-20.841	947	7.795	659	-4.74	1637	3.363	1800	3.723	1490	7.985	191	15.453	366	-2.374
782	-13.45	947	6.725	692	2.239	1655	0.118	1800	3.936	1290	7.647	204	14.601	366	-2.998
2434	-4.641	947	7.897	888	5.846	1662	3.494	1800	3.147	1820	-2.562	186	14.851	366	-6.142
738	-12.719	947	9.661	496	-23.836	1664	0.854	1800	4.22	1150	-5.909	193	14.559	366	-2.481
2093	-13.251	947	8.672	793	6.045	1669	6.633	1800	3.343	1440	4.677	189.7	12.47	366	-3.414
725	-13.263	947	9.067	657	-8.569	1678	9.602	1800	3.766	1370	8.947	190.9	12.364	366	-4.123
769	-6.8	947	8.048	830	-4.685	1682	2.904	1800	3.547	1400	7.121	192.8	10.453	366	-2.608
711	-8.818	947	8.304	765	-25.82	1692	8.107	1800	3.37	1410	6.347	197	13.324	369	-2.253
518	-0.739	947	9.187	260.7	3.755	1699	0.702	1800	4.058	1990	0.674	194.1	13.996	369	-6.264
558	5.224	979	4.715	260.7	3.351	1760	-1.041	1800	3.715	1440	8.03	190.8	13.967	369	-4.498
745	-12.232	979	3.679	260.7	3.471	1762	-2.256	1800	4.19	930	-7.31	188.1	12.998	369	-3.588
1370	8.702	979	4.368	260.7	3.725	1763	-5.812	1800	4.392	1230	8.154	194.5	14.558	369	-1.905
1370	1.911	979	4.808	260.7	2.145	1801	-2.284	1800	3.978	1440	6.644	185.2	15.43	369	-3.117
767	-31.286	979	4.782	260.7	2.261	1809	-3.485	1800	4.131	1460	7.568	195.3	14.985	369	-3.448
783	10.029	979	4.982	260.7	3.994	1824	-5.806	1797	3.915	1330	5.06	180.5	14.58	369	-1.748
913	5.924	979	4.996	260.7	3.507	1844	-2.442	1797	4.592	1500	8.25	191.3	15.523	369	-2.602
913	7.313	979	4.123	260.7	2.994	1866	-5.428	1797	4.73	1210	4.741	180.8	14.077	322	-3.471
1358	8.881	979	3.39	260.7	3.881	1874	-8.647	1797	4.42	1260	8.855	186.6	14.466	322	-3.165
2092	-18.166	979	4.905	260.7	2.93	1879	-3.945	1797	3.997	1620	8.594	189.3	15.969	322	-5.143
752	-13.169	979	4.295	260.7	6.905	1881	-5.477	1797	5.361	1750	-9.56	187.3	16.122	322	-7.665
679	11.771	979	3.32	260.7	2.269	1886	-2.601	1797	3.908	1870	-3.81	187.5	15.707	322	-3.783
2396	-10.02	2970	-2.07	260.7	0.207	1901	-0.445	1797	3.932	1390	-13.131	61	5.913	322	-4.607
653	-16.147	927	4.749	260.7	2.651	1934	-1.659	1797	4.662	1200	-15.594	66	7.186	357	-1.24
739	-14.534	927	11.11	260.7	3.001	2044	5.022	1797	4.512	1410	10.746	65	7.681	357	-1.964
746	-13.574	927	8.727	260.7	3.702	2164	5.146	1797	5.328	1440	3.676	205	-5.43	357	-3.029
818	-19.21	927	5.351	260.7	5.425	2348	8.386	1797	4.495	1230	-6.056	207	-7.903	357	-5.518
776	14.263	927	8.316	279.2	7.617	2478	0.311	1797	3.862	1070	-6.601	209	-5.127	357	-3.048
784	-16.04	1397	-18.278	279.2	5.746	2481	3.139	1797	3.888	1870	1.848	202	-6.063	345	-7.185
744	11.018	1034	-23.166	279.2	5.822	1653	3.451	1797	4.533	1410	7.695	205	-8.479	345	-7.292
749	11.887	1574	-11.689	279.2	1.249	1649	2.185	1797	3.853	1100	-0.224	208	-16.851	345	-4.494
603	9.109	1406	-16.018	279.2	4.183	1650	1.638	1797	4.278	1230	-5.131	205	-4.978	353	1.544
567	6.636	1380	-14.463	279.2	8.36	1675	1.828	1797	3.911	1460	7.213	209	-4.49	353	3.484
599	9.461	1151	-17.104	279.2	7.786	1637	1.362	1797	5.473	1460	7.213	208	-7.709	353	3.214
593	6.388	1509	-17.19	279.2	2.092	1670	1.658	1797	5.214	1330	-8.153	205	-6.592	353	1.634
603	7.002	1479	-9.998	279.2	0.315	1609	0.69	1797	4.247	1310	4.618	203	-5.163	353	3.455
629	6.415	1283	-20.28	279.2	6.035	1645	0.709	1797	3.866	1370	5.045	209	-7.427	353	2.967
611	4.36	1499	-12.827	279.2	2.666	1659	0.856	1797	5.106	1820	-1.374	204	-3.313	353	2.517
519	7.537	1562	-16.025	279.2	7.131	1644	0.226	1797	5.493	1150	2.647	208	-5.93	353	2.28
638	8.206	1535	-8.283	279.2	1.584	1642	2.75	1801	2.539	1860	-3.889	208	-6.621	353	5.155
631	5.622	1458	-8.986	279.2	2.575	1644	1.908	1801	3.507	1800	-1.698	209	-8.099	340	-5.473
497	3.979	1480	-7.464	279.2	6.338	1653	1.805	1801	3.595	1280	7.934	207	-7.644	340	-5.519
603	5.043	1306	-14.376	286.4	9.662	1654	1.627	1801	3.557	1180	3.102	204	-5.098	340	-4.964
603	6.462	1490	-13.782	286.4	11.968	1649	1.053	1801	2.899	1420	8.624	203	-12.784	340	-6.635
603	8.407	2702	-18.617	286.4	12.537	1641	0.725	1801	3.164	1430	5.178	208	-2.075	340	-5.574
603	9.52	2725	-22.056	286.4	12.021	1621	0.373	1801	2.42	1830	-1.614	205	-3.761	340	-5.954
603	10.111	2798	-15.708	286.4	11.059	1640	0.367	1801	3.347	1490	11.342	111	-6.196	340	-4.44
603	8.765	2504	-24.24	286.4	11.412	1612	-0.089	1801	4.045	1340	5.008	110	-5.908	340	-4.212
603	6.033	3017	-13.076	286.4	13.223	1614	-0.55	1801	2.631	1470	9.563	111	-6.955	340	-4.849
603	3.777	2516	-23.959	286.4	14.598	3446	1.28	1801	3.389	1410	9.043	110	-5.525	340	-6.034
603	7.099	2930	-18.366	286.4	8.936	3448	1.618	1801	2.645	1220	1.549	111	-8.565	340	-5.943
603	6.783	2607	-22.397	286.4	13.431	3446	1.771	1801	2.339	1150	-12.816	112	-6.499	340	-4.503
603	7.673	2454	-29.42	286.4	12.612	3456	1.348	1801	2.525	1440	7.708	111	-7.206	340	-5.603
603	5.797	3269	-10.042	279.1	2.753	3440	-0.714	1801	3.045	1440	9.965	112	-7.449	340	-0.812
603	6.166	2675	-18.931	279.1	2.59	3441	-0.903	1801	2.533	1230	6.513	110	-7.092	340	-1.705
603	5.516	2471	-26.58	279.1	7.595	3324	-0.56	1801	3.332	950	-5.458	109	-6.846	340	1.943
603	4.295	478	-5.737	279.1	7.967	3316	-0.883	1801	2.776	990	-7.777	111	-6.404	340	0.392
603	9.543	490	-5.45	279.1	12.419	2628	-13.287	1801	2.997	1370	7.227	110	-7.028	340	0.91
603	5.928	491	-5.925	279.1	0.267	2638	-15.32	1801	3.133	1230	6.431	112	-5.035	534	-1.41
603	9.773	497	-6.811	279.1	8.098	2521	-16.694	1801	3.62	1630	2.997	112	-4.203	534	0.468
603	3.94	467	-2.428	279.1	1.927	2728	-12.567	1801	3.119	1340	5.708	114	-5.879	534	-1.787
703	11.879	441	-7.493	279.1	12.033	3321	0.545	1706	4.646	1400	8.634	111	-6.091	534	-1.652
622	8.685	473	-8.659	279.1	8.487	3432	2.417	1706	4.015	1810	-4.437	110	-6.801	534	-6.836
628	9.266	461	-7.567	279.1	4.39	2814	-11.327	1706	3.478	1750	-9.439	110	-5.384	555	1.165
677	11.083	485	-7.973	279.1	5.027	3597	3.119	1706	3.534	1150	6.577	110	-5.578	571	-1.54
709	10.039	441	-8.23	279.7	2.033	3017	-7.291	1706	4.017	1090	-1.21	112	-5.247	523	-3.68
629	9.543	435	-8.604	279.7	1.169	2973	-8.041	1706	3.806	1870	-6.698	113	-5.241	523	-2.488
570	11.077	403	-10.777	279.7	6.19	3181	-2.231	1706	4.377	1190	5.173	110	-4.483	523	-2.33
628	8.664	457	-7.542	279.7	2.528	3264	-1.661	1706	3.682	1310	11.086	111	-4.703	523	-1.88
640	8.579	504	-7.655	279.7	5.008	3249	-0.355	1706	4.052	1880	3.921	112	-4.243	523	-2.022
616	9.048	454	-8.917	279.7	7.199	2589	-16.639	1706	4.828	1840	-4.389	114	-5.79	523	-0.802
612	6.804	482	-3.854	279.7	3.725	2708	-15.651	1706	4.241	1430	2.716	111	-4.952	523	-3.727
523	8.396	474	-5	279.7	0.81	2748	-14.683	1706	4.541	1860	-6.415	112	-7.339	523	-3.565
619	8.672	470	-4.574	279.7	4.522	2597	-15.89	1706	4.635	1350	7.876	112	-5.177	523	0.398
619	11.743	480	-3.499	279.7	1.529	2706	-17.327	1731	5.274	1430	7.165	114	-5.638	523	-2.873
619	7.163	497	-7.238	279.7	3.369	2869	-8.487	1731	5.226	1230	4.905	110	-5.391	537	-0.195
619	9.694	501	-6.209	279.7	1.956	188.9	6.627	1731	5.254	960	6.236	111	-4.717	544	0.134
619	8.719	474	-8.421	279.7	6.31	188.9	7.147	1731	6.376	1430	6.072	114	-12.73	483	0.068
619	9.961	464	-6.975	279.7	5.149	208	7.054	1731	5.908	1190	-0.97	114	-7.874	483	1.251
619	8.053	464	-7.466	279.7	5.962	208	7.084	1731	5.279	1150	4.774	115	-5.59	483	0.729
1720	1.598	485	-3.03	279.7	3.991	185.5	7.252	1731	4.9	1430	8.2	112	-6.595	483	1.929
1720	0.01	464	-3.245	279.7	7.775	185.5	7.078	1731	5.616	1200	-3.198	115	-8.276	483	0.994
1720	-28.755	467	-5.496	279.7	2.669	176.3	5.915	1731	4.857	890	-8.535	114	-12.73	483	0.984
1720	1.547	492	-4.68	279.7	3.578	176.3	7.894	1731	5.085	1790	3.752	114	-10.914	483	0.063
1720	-0.908	461	-5.436	284	4.688	45	10.316	1731	5.454	1440	7.836	115	-11.687	1070	13.173
1720	2.286	459	-7.033	284	3.538	45	11.06	1731	6.255	1460	7.75	115	-10.54	267	-32.919
1720	-1.495	461	-7.258	284	5.178	207	9.881	1731	5.295	1890	-8.436	112	-6.313	258	-9.952
1720	-1.523	474	-5.953	284	4.569	207	6.957	1731	6.214	1400	6.245	113	-6.65	251	-27.736
1720	-6.572	480	-10.7	284	2.705	174	7.619	1731	6.004	1220	-6.253	113	-7.504	1873	-21.737
1720	-1.506	462	-5.667	284	5.586	174	7.982	1731	5.369	1220	-10.781	116	-5.269	269	-26.827
1720	1.599	494	-3.239	284	4.091	215	9.34	2719	-1.293	1480	8.521	114	-12.021	258	-27.208
1720	-5.466	480	-8.429	284	14.531	215	6.967	2837	3.699	1730	-0.177	116	-3.688	2627	-0.237
1720	0.708	464	-4.581	284	2.626	37	12.851	2791	-1.365	2530	3.774	112	-13.939	2670	-4.466
1720	-3.783	467	-8.018	284	4.819	37	10.262	2856	1.185	1690	6.537	116	-7.648	245	-12.824
1720	0.611	464	-6.903	284	3.067	36	12.701	2758	0.84	1730	-2.074	113	-4.766	2408	-4.63
1720	-6.506	467	-7.944	284	3.332	36	10.192	2779	-0.718	1730	1.947	112	-7.104	267	-26.925
1720	-0.461	473	-9.333	284	4.719	37	10.268	2844	0.299	1770	-5.214	114	-6.878	253	-12.978
1720	1.49	457	-7.894	284	5.345	37	12.142	2797	0.614	1860	-0.525	114	-7.476	792.9	11.117
1720	0.795	467	-8.207	284	1.597	38	12.401	2826	0.679	1720	5.413	115	-5.911	919.4	13.661
1720	0.121	460	-7.88	284	2.072	38	11.306	2780	1.08	1720	10.723	112	-8.907	763.6	5.534
1720	2.384	488	-1.987	284	4.642	37.7	13.661	2837	4.203	1740	0.994	115	-8.273	901.1	9.452
1720	0.504	488	5.637	284	4.527	37.7	13.61	2814	-0.77	1770	-2.138	112	-4.064	932.3	10.081
1720	0.941	473	-3.03	284	5.474	206	8.227	2838	2.28	1750	2.397	113	-6.546	930.9	10.665
1753	3.676	489	1.06	284	4.638	206	8.262	2821	2.383	1750	7.724	111	-6.312	816.9	8.277
1753	4.43	479	-1.453	251.4	1.536	216	8.163	2837	2.618	1700	4.132	113	-7.213	780.7	11.323
1753	4.121	487	-1.712	251.4	1.542	216	8.696	2817	-1.169	1710	10.723	116	-11.332	897.3	12.62
1753	3.499	478	-2.008	251.4	0.21	509	12.412	2682	-2.956	3430	0.382	114	-6.876	810.1	10.061
1753	3.686	479	0.008	251.4	3.309	500	11.864	2821	2.859	2640	0.353	116	-7.194	749.6	10.994
1753	5.047	469	-1.331	251.4	3.59	505	12.043	2837	0.247	1690	-4.722	113	-7.847	938.9	11.384
1753	2.509	470	-1.722	251.4	1.893	499	11.645	2837	-0.382	2070	0.457	115	0.387	928	11.908
1753	3.156	478	-2.031	251.4	2.972	496	11.789	2837	3.115	1850	-3.671	112	1.003	926.5	10.392
1769	-0.828	484	1.138	251.4	3.074	513	12.048	2837	5.523	1760	-3.895	116	-0.506	920.4	12.425
1769	1.123	464	-2.877	251.4	1.946	506	11.821	2837	1.723	1650	6.845	112	1.491	923.3	12.469
1769	-0.582	491	3.22	251.4	1.014	512	10.814	2837	-1.91	1720	7.883	114	1.381	911.6	12.614
1769	1.733	484	-1.254	251.4	2.479	519	11.933	2837	1.908	1630	5.701	116	0.511	800.3	10.242
1769	0.753	475	0.842	251.4	3.435	497	11.381	2837	5.114	1840	2.126	115	1.196	881.9	12.475
1769	1.555	479	0.273	251.4	1.088	507	11.516	2790	-1.436	1720	6.108	114	1.576	861.7	10.897
1769	1.573	466	-0.327	251.4	-0.779	502	11.48	2837	0.076	1730	6.451	114	2.362	930	13.332
1769	-2.773	484	0.695	251.4	2.939	520	11.578	2837	-1.108	2270	0.379	110	1.373	915.5	11.002
1769	1.543	479	0.769	251.4	4.016	508	11.18	2699	-2.321	1720	6.224	115	0.586	926.8	10.585
1769	1.172	495	-1.346	251.4	2.348	528	11.889	2699	-2.647	1970	4.685	115	-0.168	889.5	11.175
1769	0.747	477	-1.547	251.4	4.227	502	11.922	2688	-0.916	2500	-0.494	115	9.497	793.2	10.177
1769	0.443	489	-8.197	251.4	2.3	440	10.453	2736	-4.821	1700	6.285	113	9.408	873.6	13.258
1769	2.826	513	-2.727	251.4	4.729	491	10.992	2699	-3.259	1610	1.747	114	8.294	874.1	13.459
1741	3.177	478	-8.427	280	4.275	493	11.97	2699	-1.692	1830	0.486	111	9.987	861.6	13.912
1741	3.718	483	-8.259	280	5.936	519	10.658	2699	1.229	1750	5.824	111	8.105	878.4	13.638
1741	2.8	461	-7.45	280	4.559	515	11.436	2699	-6.641	1730	5.275	113	8.804	3017	2.905
1741	2.699	469	-7.646	280	3.417	504	11.552	2688	-3.29	1700	6.616	110	8.845	2993	0.296
1741	3.744	468	-4.572	280	5.873	521	11.989	2699	-7.085	1730	7.405	115	9.19	3002	3.159
1741	2.171	457	-7.777	280	5.203	511	12.099	2696	-3.639	1750	6.653	113	9.427	3019	2.625
1741	1.897	476	-4.9	280	5.94	499	12.483	2699	-1.752	1720	4.225	112	9.565	2983	4.744
1741	2.671	511	-3.513	280	4.67	502	13.12	2697	-3.016	1760	1.314	115	9.121	3003	4.268
1741	3.692	517	-3.883	280	4.9	499	11.478	2699	-3.37	1760	-1.411	110	8.474	3006	3.999
1741	3.762	504	-5.319	280	5.454	499	13.198	2688	-5.805	2530	-1.24	110	10.139	2979	3.951
1826	3.842	505	-4.477	280	6.136	431	5.341	2699	-2.136	1760	-3.776	116	9.179	2999	1.937
1826	4.2	518	-3.488	280	2.806	414	3.239	2670	-1.14	1980	-8.458	111	8.644	2979	2.897
1826	2.194	512	-3.854	280	6.08	1738	-5.437	2683	-3.873	1760	0.485	110	8.983	2942	3.744
1826	2.372	469	-9.205	280	5.786	1836	-4.403	2672	-3.777	1770	6.036	110	10.346	3182	3.94
1826	3.645	494	-6.65	280	4.046	1723	-5.365	2699	-3.745	2130	2.486	112	9.626	2943	3.648
1826	3.541	492	-5.453	280	3.829	1915	-0.508	2745	1.061	2240	-1.157	109	10.546	3187	3.358
1826	2.621	498	-5.854	280	5.518	1817	-4.856	2699	-3.483	1810	0.867	112	10.12	2963	-0.351
1826	2.677	507	-3.331	280	3.677	1842	-2.664	2699	-0.664	2420	0.576	466	-9.938	2957	0.278
1826	2.942	495	-3.938	280	7.639	1828	-4.328	2699	-1.029	1740	-2.804	108	6.357	2961	1.49
1826	1.022	507	-5.052	280	3.628	1786	-5.205	2699	-4.421	1300	-2.434	589	-1.035	2937	1.19
1826	4.005	500	-3.525	284.8	4.011	1789	-5.368	2699	-0.226	2090	-2.581	614	-0.05	2903	-0.266
1826	2.838	498	-2.821	284.8	3.258	1807	-7.001	2699	-2.29	1880	0.243	1126	0.257	2956	4.264
1826	3.96	490	-7.401	284.8	3.392	1799	-4.83	2699	-2.29	1730	0.294	151	5.372	2962	1.467
1826	2.77	488	-6.535	284.8	5.285	1787	-4.298	2699	-6.07	1740	-1.491	985	-7.495	2942	-0.162
1826	1.832	476	-3.763	284.8	7.05	2410	0.493	1962	-24.024	1853	-0.301	865	4.581	2971	2.939
1816	4.525	489	-5.262	284.8	5.197	1828	-2.58	2709	-24.111	1800	-2.104	1632	-3.158	2943	2.957
1816	0.293	492	-3.724	284.8	7.285	1876	-2.169	2709	-15.66	2661	-9.791	152	-6.003	2914	0.533
1816	0.357	491	-5.478	284.8	4.037	1852	-4.191	2709	-11.973	2671	-3.524	1146	-2.794	2944	2.291
1816	2.511	503	-6.491	284.8	4.299	1839	-2.974	2709	-11.964	2606	2	806	1.674	2983	1.971
1816	1.98	500	-7.685	284.8	6.452	1814	-3.536	2763	-11.857	2484	-0.42	1237	3.836	2980	1.089
1816	4.853	494	-6.934	284.8	1.452	1852	-1.747	2709	-11.522	1783	-7.545	175	9.133	2948	3.374
1816	3.839	499	-3.692	284.8	6.746	1852	0.801	2709	-9.974	2485	-2.888	119	-6.12	2795	-5.029
1816	5.495	495	-4.958	284.8	4.354	1861	0.011	2709	-9.173	1862	-1.522	520	-15.723	2777	-4.991
1816	1.977	505	-6.317	284.8	5.71	1741	-0.268	2709	-9.041	1817	-2.854	1594	-3.643	2776	-1.541
1816	1.442	502	-7.071	284.8	3.412	1798	0.707	2709	-9.041	1846	-7.421	499	-16.003	2785	-3.255
1816	1.5	493	-5.494	284.8	3.346	1734	-0.474	2709	-8.764	1790	-1.54	1311	-4.967	2741	-5.03
1816	2.503	506	-5.95	284.8	5.625	1756	1.875	2709	-8.747	1774	8.206	1091	-4.563	2785	-7.105
1816	3.594	501	-6.092	284.8	3.456	1812	0.594	2779	-8.289	2541	2.537	546	0.066	2786	-3.733
1816	4.809	497	-0.678	284.8	2.65	1799	0.819	2709	-8.687	1786	-0.043	949	-3.14	2741	-0.649
1819	3.486	499	-0.08	284.8	4.274	1822	1.171	2709	-8.513	1831	-12.984	1187	3.774	2738	-2.189
1819	3.219	488	1.775	284.8	7.551	1836	4.622	2709	-8.385	2563	0.208	308	-8.655	2804	2.275
1819	3.183	484	1.16	284.8	3.613	1750	0.617	2709	-8.314	1777	-1.141	1413	2.99	535	4.962
1819	2.61	496	0.387	284.8	5.993	1914	4.362	2713	-8.287	1865	1.457	1143	1.218	71	12.871
1819	4.592	488	0.812	284.8	5.923	1809	1.338	2709	-8.165	2478	-3.06	1201	1.824	71	12.031
1819	3.005	485	1.262	285	15.452	1832	0.749	2709	-7.931	2625	1.99	1490	3.39	76	12.301
1819	2.83	487	1.789	285	12.592	1923	1.213	2709	-7.889	1801	0.716	670	-5.056	269	-2.417
1819	2.416	2508	7.264	285	13.39	1757	-3.179	2709	-7.857	1792	-0.683	1096	9.769	77	12.621
1819	2.696	2508	3.08	285	12.983	1762	-0.571	2703	-7.919	2577	1.511	846	-5.903	267.8	-0.752
1819	2.633	2508	4.891	285	12.547	1736	-3.588	2709	-7.713	2474	-1.114	874	4.73	253.2	-1.467
1819	4.181	2508	3.344	285	14.069	1806	1.83	2709	-7.581	2445	-4.686	1764	-6.586	237.1	-2.454
1819	3.009	2508	4.125	285	12.935	1771	-0.359	2709	-7.533	2483	-1.037	974	0.131	272.7	-1.017
1221	-0.532	2508	3.901	285	12.404	1758	-1.76	2709	-6.859	2419	-2.404	2877	-9.329	279.2	-1.983
1221	-1.324	2508	4.345	285	11.832	1800	0.114	2720	-6.984	1763	1.941	1055	5.492	279.3	-2.451
1221	-1.287	2508	4.678	285	11.871	1760	-1.645	2707	-6.722	1794	2.509	1701	-0.882	261.7	-1.834
1221	-2.596	2508	2.063	285	11.577	1781	1.239	2690	-6.774	1855	3.436	2812	2.158	268.4	-3.661
1221	-3.981	566	-28.269	285	13.688	1815	0.714	2715	-6.728	1790	2.04	1238	-1.202	262.1	-6.432
1221	-0.14	555	-37.473	285	11.709	1772	1.508	2709	-6.624	2483	-1.278	1714	0.95	260.9	-2.803
1221	-1.181	555	-36.539	285	12.892	1618	-3.187	2709	-6.482	2485	1.432	613	-2.015	258.4	-3.814
1221	-1.677	555	-36.905	285	13.633	1428	-8.1	2709	-6.387	2309	3.301	1244	-1.709	278.2	-1.065
1221	-0.634	555	-37.341	285	12.218	1784	1.73	2709	-6.396	1784	-3.031	1411	6.774	283.6	-1.797
1221	-1.316	555	-37.568	285	12.694	1762	0.577	2709	-6.338	2458	2.471	590	-4.999	265.7	-2.042
1221	-0.429	555	-37.917	285	10.839	1767	-0.127	2709	-6.322	1744	6.63	2434	-8.65	265.5	1.367
1221	-0.319	555	-37.527	285	12.709	1776	-0.53	2709	-6.296	2699	-4.316	1940	3.809	266.7	0.27
2620	-0.706	555	-36.332	278.6	11.413	1746	-0.491	2709	-6.304	1778	0.691	1760	-3.617	261.9	0.548
2633	-0.407	2490	4.364	278.6	13.542	1780	0.99	2709	-6.155	1751	6.293	456	-18.14	267.1	-0.267
2620	0.565	2490	3.45	278.6	12.087	301	13.024	2709	-6.07	1748	0.844	2567	6.648	251.1	2.711
2620	-0.563	2490	3.162	278.6	12.876	301	12.54	2709	-6.005	2635	0.116	1685	4.85	246.2	1.746
2620	-0.597	2490	7.833	278.6	12.409	301	14.423	2604	-8.803	1770	2.541	1293	-8.312	252.5	3.768
2620	-0.367	2490	2.534	278.6	10.992	301	13.942	2709	-5.855	1773	0.361	1150	4.689	235.4	4.617
2620	-0.213	2490	2.804	278.6	8.986	301	13.99	2709	-5.855	1779	-3.638	1784	-2.457	255.1	5.448
2620	-0.269	2490	1.233	278.6	15.448	301	15.752	2709	-5.866	2765	-1.734	600	-4.074	237.1	3.999
2620	-0.523	2490	4.587	278.6	12.531	301	11.754	2703	-6.294	2668	0.858	734	-12.675	251.8	3.906
2630	-0.456	551	-32.697	278.6	11.735	301	15.071	2760	-5.147	1802	-3.732	1684	-3.967	249.2	5.477
2630	-0.347	2490	3.536	278.6	11.483	301	14.626	2795	-4.747	1742	1.951	1158	2.164	248.5	3.66
2603	0.179	1087	8.418	278.6	14.332	301	12.888	2875	-1.768	1747	-1.307	185	-3.178	303.4	-2.633
2630	-0.33	1087	8.262	278.6	12.547	301	15.68	2748	-7.597	1805	1.47	184	-5.445	309.7	-2.458
2642	-0.203	1087	8.462	278.6	12.692	118.5	12.698	2752	-8.146	1744	4.129	186	-4.712	311.6	-0.794
2630	-0.37	1087	8.365	278.6	12.921	118.5	13.94	2766	-5.203	1832	5.64	188	-5.27	304.7	-0.862
2630	-0.247	1087	8.072	278.6	12.563	118.5	14.556	2769	-5.276	1819	-0.175	187	-4.844	309.6	-1.659
2618	-0.709	1087	8.259	278.6	12.28	118.5	14.406	2794	-6.232	1759	1.017	183	-4.866	306.4	-1.141
2618	-0.112	1087	8.299	278.6	13.049	118.5	13.022	2799	-5.912	1744	0.779	173	-6.532	316.5	-2.319
2658	2.976	1087	7.807	278.6	10.559	118.5	12.909	2800	-10.315	1750	1.169	177	-4.69	318.5	-1.067
2618	-0.209	1087	9.13	283.8	12.145	118.5	15.676	2805	-4.657	1842	6.246	173	-5.014	311.2	-1.069
2626	0.422	1087	8.527	283.8	10.336	118.5	15.325	2809	-5.342	1744	7.013	174	-4.309	313.6	-2.391
2651	0.042	1087	8.189	283.8	12.279	118.5	15.145	2806	-4.992	1754	3.85	173	-9.839	313.3	-1.269
2650	0.134	542	-2.909	283.8	10.753	118.5	14.197	2809	-6.858	1743	1.097	179	-4.792	316.3	-2.169
2651	-0.119	542	-2.173	283.8	13.502	118.5	13.018	2809	-3.253	1806	-3.915	176	-3.919	310.3	-2.121
2650	-0.343	542	-1.518	283.8	10.545	118.5	14.936	2809	-4.877	1750	2.193	176	-3.653	312.6	-2.346
2644	-0.196	542	-3.291	283.8	13.849	118.5	15.483	2809	-4.521	1743	1.57	180	-4.033	315.9	-5.266
2662	0.492	1678	-1.024	283.8	12.554	118.5	15.386	2809	-9.692	1783	-1.748	172	-4.456	303.6	-3.141
2665	0.07	1681	-1.569	283.8	11.563	118.5	12.812	2809	-4.413	2630	2.944	173	-4.606	315.7	-1.105
2636	0.233	1672	-0.662	283.8	12.388	118.5	14.183	2809	-6.912	1744	2.874	182	-5.774	306.3	0.338
2635	-0.333	1707	-3.493	283.8	5.071	118.5	15.67	2809	-6.412	2476	-2.562	182	-8.448	312.1	-0.181
2635	-0.092	1674	-4.53	283.8	8.498	118.5	13.796	2809	-6.462	1744	2.566	186	-7.457	306.5	-1.28
2635	-0.145	1707	-1.831	357.5	7.96	118.5	13.339	2809	-4.884	1746	-2.213	183	-7.267	311	-0.469
2635	-0.162	1629	-2.589	357.5	8.531	118.5	15.431	2809	-2.59	1757	0.123	183	-10.729	314	0.251
2635	0.63	1755	1.287	357.5	8.688	118.5	15.666	2809	-4.708	1771	1.887	183	-7.54	312.7	-1.02
2635	-0.558	1705	-0.816	357.5	12.62	118.5	15.877	2809	-3.038	1750	1.038	186	-8.238	307	-1.292
2656	-0.175	1649	-3.199	357.5	13.182	118.5	16.176	2809	-3.058	1741	0.566	185	-8.457	317.1	-1.006
2665	0.197	1714	-4	357.5	10.734	118.5	16.179	2809	-6.234	1744	2.309	183	-8.191	305.1	0.227
2665	0.474	1687	-3.681	357.5	10.703	118.5	16.341	2809	-3.166	1740	5.744	182	-8.851	315.5	-0.046
2676	-0.116	1706	-1.386	357.5	11.307	126.2	12.646	2809	-7.448	1744	1.043	182	-8.434	313.4	-0.333
2661	-0.905	1721	-2.676	357.5	12.801	126.2	9.695	2809	-2.992	1793	2.859	187	-7.432	308	-1.052
2665	-0.569	1696	-4.274	357.5	10.066	126.2	10.23	2809	-2.978	2499	6.806	187	-7.769	296.3	-0.155
2665	-0.403	1632	-4.704	357.5	9.777	126.2	7.499	2809	-5.698	2572	1.057	109	-3.099	305.1	-1.173
2665	0.355	1701	-3.343	357.5	6.286	126.2	7.574	2809	-2.164	2473	-0.084	111	-2.884	303.4	-0.603
2665	-0.278	1709	-3.898	357.5	9.68	126.2	11.666	2809	-4.646	1746	4.197	110	-2.686	309.3	-0.149
2500	-3.472	1692	-2.675	357.5	11.933	126.2	8.319	2809	-6.9	1753	1.376	110	-1.679	299.5	-1.124
2500	-2.652	1728	-0.467	357.5	8.723	126.2	13.241	2809	-7.027	1816	-0.835	111	-2.621	308.5	-1.345
2588	-1.37	1732	0.899	357.5	12.062	126.2	11.428	2809	-3.512	3332	1.113	111	-2.85	307.3	-0.689
2355	-6.388	1634	-2.64	357.5	9.997	126.2	14.47	2809	-7.635	2529	-9.414	111	-2.568	327.4	-3.176
2490	-2.198	1675	-2.883	357.5	11.486	126.2	11.33	2809	-7.635	251	-52.324	111	-1.5	312.2	-2.823
2432	-4.478	1724	-4.77	357.5	11.321	126.2	7.678	2809	-2.134	2525	4.664	110	-2.788	322.1	-2.985
2491	-0.735	1724	0.292	357.5	11.915	126.2	5.302	2809	-5.515	1849	10.004	110	-1.507	334.3	-0.735
2500	-1.598	1633	-4.539	357.5	9.134	126.2	14.472	2809	-4.307	2596	-7.908	110	-1.54	314.4	-2.811
3537	-1.871	1698	-0.996	357.5	10.121	3325	0.708	2809	-6.39	1779	6.733	111	0.99	323.4	-2.567
3537	-2.605	1717	0.314	397.5	13.032	3265	-1.621	2809	-8.105	1814	2.791	111	-2.362	308	-2.461
3537	-2.033	1715	-0.473	397.5	14.893	3266	0.081	2809	-6.243	1856	-1.116	111	-2.663	395.6	-0.881
3537	-0.574	1695	-2.103	397.5	13.704	3236	-1.489	2809	-3.166	3246	-6.083	111	-2.695	342.2	-1.316
3537	1.469	1678	-2.019	397.5	13.698	3243	-2.739	2809	-4.954	2513	5.888	111	-2.773	315	-0.558
3537	-2.436	1717	-2.932	397.5	12.112	3314	0.458	2809	-7.806	2066	-17.642	109	-2.488	301.1	-1.694
3537	-2.406	1210	-11.029	397.5	13.953	3319	-1.099	2809	-6.233	1903	-5.395	110	-2.982	304.5	-3.226
3537	-2.192	1199	-9.813	397.5	13.977	3292	0.453	2809	-4.583	1882	-1.568	117.4	-7.612	304.9	-1.128
3537	-2.192	1183	-11.519	397.5	14.034	3303	-0.163	2809	-4.583	2624	2.242	118	-4.616	303.9	-1.301
3644	-1.245	1194	-9.951	397.5	14.36	3311	1.49	2809	-6.187	1818	4.82	117.7	-7.372	298.9	-1.926
3644	-1.641	1193	-11.434	397.5	14.31	3319	-0.213	2808	-9.594	2533	-1.704	117	-9.722	303.1	-1.355
3644	-3.505	1214	-8.676	397.5	14.024	3244	-1.244	2810	-3.861	1928	6.353	117	-6.587	301.2	-1.241
3644	-2.813	1190	-11.627	397.5	13.259	3239	-2.008	2811	-5.125	1843	1.488	118.1	-6.508	297.3	-2.103
3644	-3.743	1187	-12.04	397.5	14.129	3245	-3.618	2816	-4.327	2524	2.335	118	-8.702	298.1	-1.109
3644	-0.347	1198	-11.033	397.5	12.611	3254	0.035	2820	-6.043	2523	-5.513	117.2	-9.191	302.3	-1.684
3644	-2.04	1192	-11.417	397.5	12.05	3251	-1.511	2821	-3.168	1971	-5.865	117	-8.988	299.8	-2.134
3661	-2.23	1184	-10.753	440.6	14.87	3236	-1.025	2823	-4.626	1801	-2.675	111	-4.678	297.2	-1.948
3661	0.377	1201	-9.869	440.6	15.222	3246	-1.087	2827	-1.938	1804	0.476	111	-4.741	297.1	-1.593
3661	-2.852	1189	-12.038	440.6	14.027	3296	-1.424	2853	-4.959	1800	-0.76	111	-4.242	300.5	-1.149
3661	1.181	1195	-10.583	440.6	14.741	3306	0.113	2947	-12.537	1796	-0.706	110	-5.532	305.6	-1.013
3661	-2.261	1211	-8.752	440.6	15.353	3307	2.731	3178	-8.173	1931	2.216	109	1.301	301	-2.842
3661	0.21	1211	-10.803	440.6	12.517	3235	-2.431	3140	-12.296	2023	0.192	114	1.199	296.6	-1.924
3661	-2.781	1202	-11.914	440.6	13.858	3236	-4.911	3370	-9.158	2541	-3.903	110	-5.861	307.8	-1.931
3661	-2.02	1200	-10.34	440.6	14.254	3247	-3.591	3344	-8.766	1850	-3.777	111	-6.135	279	-2.002
3661	-5.131	1190	-10.066	440.6	13.484	3221	-2.613	3451	-6.655	2515	2.34	111	-5.276	297.9	0.451
3661	-0.303	1205	-11.259	440.6	12.223	3234	-0.819	3418	-6.747	2514	7.057	110	-6.146	306.3	0.035
3661	-3.047	1183	-12.537	440.6	13.97	3245	-5.468	3432	-6.235	2523	-2.051	111	-6.398	311.7	-0.689
3661	-1.459	1211	-8.194	440.6	13.822	3246	-2.07	3217	-10.853	1919	7.086	112	-9.105	316.8	-0.408
3661	-2.23	1205	-7.904	365	11.462	3243	-0.936	3312	-10.617	2518	0.541	110	-7.83	303.3	-0.108
3661	-0.336	1229	-10.607	365	13.145	3232	-3.074	3423	-7.525	1962	8.936	111	-9.232	314.8	-0.598
3647	-1.702	1191	-10.694	365	12.647	3256	-2.803	3377	-9.537	2011	-2.867	110	-8.937	312.3	0.279
3647	-2.176	1214	-9.611	365	11.576	3242	-3.811	2716	0.564	2564	-5.071	110	-9.394	307.3	-0.609
3647	0.156	2712	-3.239	365	13.622	3239	-3.946	2716	-1.158	1825	4.103	111	-7.737	311.7	-1.804
3647	3.905	2712	1.242	365	11.797	3247	0.366	2716	-1.441	1822	-0.781	112	-9.618	303.6	-0.155
3647	0.381	2712	0.984	365	13.185	3236	-1.822	3190	2.44	1919	-5.417	111	-7.231	308.5	-0.347
3647	-0.952	2712	3.765	365	11.514	3237	-1.254	3203	-2.098	2607	0.262	111	-8.439	314.2	2.037
3647	1.305	2712	1.453	365	13.729	3250	-1.131	3146	-0.818	2569	-17.698	111	-8.531	303.8	-1.434
3647	-3.319	2712	-0.094	365	13.279	3238	-1.772	3118	-3.333	2596	-5.391	111	-8.717	313.8	2.058
3647	-2.893	2712	4.862	365	13.702	3240	-2.001	3173	-3.878	2559	-3.558	111	-9.174	311.3	-0.221
3647	-1.647	2712	2.003	365	13.424	3251	-4.396	3173	-0.476	2595	0.358	110	-7.676	286.1	-0.74
3647	-2.891	2712	1.436	365	11.521	3248	-5.528	3183	-0.442	3277	-0.583	113	-7.985	309	0.055
3647	-0.119	2712	3.501	365	13.667	3246	-4.041	3193	-2.364	2654	3.28	109	-9.362	315.3	0.799
3647	-1.249	2712	0.901	365	11.721	3236	-2.079	3014	-3.63	1838	-1.675	111	-8.69	313.3	0.02
3647	-0.992	2712	0.309	365	11.326	3256	-2.961	3083	-2.749	2442	-4.089	111	-4.231	313.2	-0.828
3647	-1.733	2712	-0.191	365	13.387	3251	-3.651	3173	-2.064	1821	2.197	109	-4.057	309.5	-0.071
3647	-2.997	2712	2.103	365	13.537	3303	0.587	3173	-0.585	1775	-5.255	111	-5.026	317.4	0.557
3647	-0.274	2712	-2.435	365	12.993	3222	-2.938	3173	2.526	2495	-4.49	109	-5.063	299.2	0.049
3647	-0.126	2763	-1.159	365	12.601	3227	-3.833	3200	0.315	2558	-0.001	111	-5.019	310.6	-0.555
3647	-3.349	2763	-3.653	365	13.579	3214	-2.573	3168	1.722	2479	-2.472	112	-4.822	308.5	1.109
3647	-3.54	2763	1.908	365	12.852	3223	-3.458	3065	-5.199	2672	2.583	110	-5.114	309	-0.366
3647	-3.121	2763	-0.148	365	12.819	3208	-3.166	3170	-0.882	1850	4.362	112	-4.791	303.8	0.731
3647	-2.06	2763	-3.299	365	12.345	3222	-1.559	3173	-1.342	2480	-1.056	110	-4.167	309.2	-0.46
3647	-0.147	2763	-0.594	423.7	12.077	3218	-3.014	3173	-0.568	2480	-4.526	111	-5.233	311.1	0.59
3647	0.386	2763	-0.053	423.7	12.524	3229	-1.287	3173	-1.751	1862	-3.967	113	-5.409	299.7	-0.672
3647	-1.809	2763	-1.302	423.7	12.971	3223	-2.77	3209	-0.894	1734	2.704	111	-5.081	303.1	-0.218
3647	-2.169	2763	-2.044	423.7	10.973	3220	0.147	3097	-1.876	2476	-1.049	109	-4.729	300.4	-0.906
3647	-3.501	1199	-16.853	423.7	13.527	3226	-3.454	3173	-2.845	1738	4.433	111	-4.331	307.6	-0.703
3647	-2.273	2763	-4.41	423.7	12.435	3228	-3.242	3173	-0.112	1737	6.093	110	-4.682	312.2	0.516
3647	-0.847	2763	-2.257	423.7	11.737	3307	-3.075	3133	-2.897	3236	-9.403	112	-4.845	305.2	-0.726
3647	-2.286	2763	-2.114	423.7	12.842	3241	-1.498	3181	0.05	1741	5.684	119	-4.607	301.2	-0.514
3647	-1.465	1255	-15.831	423.7	12.18	3238	-0.112	3170	-1.084	1738	8.178	119	-4.406	312.4	-0.063
3647	-2.774	2763	-2.744	423.7	13.713	3237	-0.301	3115	-3.58	1732	4.336	118	-4.372	311.7	-2.017
3647	-4.041	2763	-2.964	423.7	12.59	3230	-0.557	3123	-3.247	1739	3.659	119	-3.784	304.7	-1.806
3647	-0.424	2763	-3.548	423.7	12.546	3231	-0.374	2916	-6.064	2669	-8.275	118	-4.616	301.9	0.357
3647	-0.148	2763	-0.307	423.7	11.488	3233	-1.577	3136	-1.706	1735	3.079	118.3	2.324	306.2	-1.576
3647	-1.025	2763	0.476	423.7	11.348	3307	-1.121	3164	-2.042	1737	5.816	120	-5.315	312	-0.001
3505	-1.397	2763	-2.248	423.7	12.031	3286	0.36	2882	-8.244	2476	-3.555	119	-5.311	311.5	0.013
3505	-2.144	2763	-0.099	423.7	12.766	3303	-1.042	3106	-3.965	2472	-1.321	118	1.247	168.7	5.147
3505	-1.488	2763	-2.842	423.7	12.726	3297	2.504	3180	-1.309	2468	-0.104	118	-4.77	168.1	4.469
3505	-1.193	2763	-1.757	423.7	11.079	3294	2.642	3161	0.401	1799	-19.458	118	0.995	165.6	5.183
3505	-2.168	1666	-2.73	423.7	11.8	3247	-0.868	3178	-3.461	1861	-0.553	119	2.499	163.8	5.234
3505	-3.321	1666	0.52	423.7	12.715	3243	-2.07	3173	-0.947	2633	-0.844	118.9	2.578	170.3	4.963
3505	-1.508	1666	-1.459	425	-3.268	3229	-3.487	3016	-4.688	1736	5.814	119	-5.546	171.9	5.324
3534	-1.361	1666	0.418	425	-8.104	3235	-0.74	3064	-4.878	1902	-1.611	117	1.546	168.7	5.167
3534	0.389	1252	-6.393	425	-3.021	3239	1.908	3167	-4.133	1738	5.841	118.6	-5.097	174.1	4.875
3534	2.362	1666	1.368	425	-1.888	3238	-2.198	3179	-1.227	1740	5.971	117	6.105	171.1	3.787
3534	0.049	1666	-1.899	1741	0.104	3231	-2.001	3181	0.7	1843	5.868	194	-18.107	165.3	5.009
3534	1.888	1666	-3.235	425	0.465	3265	-1.543	3128	-1.646	1738	-0.831	194	-15.589	169.2	5.16
3534	-0.024	1666	-1.152	1405	8.712	3223	-2.819	3176	-1.892	1740	7.555	193	-18.023	167.4	6.066
3534	-0.175	1666	-0.94	425	-2.988	3243	1.986	3210	-1.093	2665	4.005	192	-18.467	165.9	5.698
3534	2.151	1666	-1.265	425	-4.938	3213	-4.964	3154	-0.584	1741	6.909	196	-17.835	169.5	5.162
3534	1.036	1666	-5.666	425	-1.248	3334	-2.433	3049	-2.319	1741	5.513	193	-18.801	171.7	5.53
3534	-0.057	1666	-2.876	425	-1.068	3302	1.361	3049	-3.607	1741	6.388	193	-18.616	171.4	5.431
3534	1.104	1666	-1.777	833	-2.363	3311	-0.234	2678	-3.26	2560	4.743	194	-20.074	169.2	4.444
3534	1.842	1666	-2.475	809	5.72	3308	0.28	2743	5.323	1739	7.006	192	-17.938	168.2	5.996
3534	1.186	1666	0.56	425	-5.199	3450	0.47	2743	4.986	1744	4.371	156	-12.502	533	-4.757
3534	-0.125	1666	-2.05	425	-2.916	3302	0.806	2692	1.845	2489	3.042	153	-13.253	533	-3.352
3534	-0.727	1666	-3.849	809	0.992	3302	-1.817	2703	-7.079	1747	7.774	153	-11.169	533	-2.021
3534	-0.154	1666	-4.294	809	-0.09	3319	0.886	3042	-3.309	1744	4.497	153	-12.711	533	-2.151
3534	-0.554	1666	-0.77	1378	10.041	3271	-0.286	3042	-2.611	1740	0.114	154	-11.472	533	-0.874
3534	0.795	1666	-2.236	808	1.291	3315	-0.322	2700	-2.393	1740	4.544	154	-11.22	533	-0.998
3534	1.549	1666	-0.188	949	3.931	3290	0.589	3169	1.407	1741	3.085	155	-12.702	533	-0.173
3534	2.463	1666	-1.436	1723	4.796	3294	-0.743	3156	-1.535	1740	9.322	153	-13.749	533	-1.912
3534	1.455	1317	-6.121	869	-5.346	3299	0.716	3056	-2.852	1865	8.556	152	-11.301	11.3	8.198
3534	0.019	1666	-0.888	771	0.635	3323	1.043	3072	-1.974	1739	7.704	154	-12.172	11.3	8.41
3534	2.225	1275	-7.141	873	-5.749	3297	-0.625	2786	-12.87	2756	-9.992	154	-11.566	11.3	9.081
3534	-1.413	1666	-0.848	756	4.982	3325	0.481	2969	-4.246	1752	6.294	155	-12.228	11.3	8.412
3534	0.066	1666	-0.89	776	6.418	3298	-0.903	3109	-2.697	1761	9.06	155	-12.608	11.3	8.234
3601	-2.426	1285	-7.004	879	-5.023	3286	0.871	3126	-2.123	1757	10.403	153	-12.703	11.3	8.234
3601	-3.824	1666	-1.644	774	-6.288	3337	0.724	3201	-1.21	1753	8.689	130	-6.279	11.3	8.977
3601	-4.273	1201	-12.205	809	6.072	3422	1.135	3117	-2.193	1758	6.472	130	-6.463	11.3	7.703
3601	-3.35	1199	-9.952	781	1.502	3295	0.141	3190	0.366	1755	9.776	130	-6.556	11.3	7.033
3601	-2.493	1207	-10.083	783	3.644	3292	-0.905	3190	0.441	1751	7.596	129	-6.319	11.3	7.311
3601	-0.555	1210	-12.083	819	3.303	3296	-0.654	3195	-0.931	1755	5.912	130	-20.222	11.3	9.256
3601	-3.657	1208	-8.37	777	8.019	3286	-1.293	3195	-0.445	1757	7.123	129	-5.911	11.3	8.731
3601	-0.47	1204	-9.264	897	-4.037	3318	-1.131	3090	-2.689	1753	9.428	130	-5.793	11.3	8.164
3601	0.318	1191	-7.205	841	-2.444	3314	-0.178	3206	-1.502	1758	8.545	130	-5.598	11.3	9.54
3601	-0.814	1202	-10.647	830	3.841	3313	-0.564	3206	-1.582	1756	10.179	130	-5.212	11.3	8.516
3553	0.521	1208	-11.187	981	10.29	3321	1.853	3213	-0.744	1754	9.037	129	-5.586	11.3	8.516
3553	1.853	1239	-9.584	827	6.587	3312	-0.332	2615	-9.895	1745	10.555	130	-5.365	11.3	8.975
3553	0.557	1220	-8.892	775	7.821	3308	-0.286	3168	-0.562	1737	7.497	132	-5.274	11.3	9.596
3553	-0.809	1190	-10.915	773	7.737	3274	-0.474	3141	-0.372	1754	8.921	213	-6.882	11.3	7.914
3553	0.705	1183	-8.32	779	-0.984	3312	-0.638	3059	-2.475	1747	8.791	210	-8.107	11.3	9.012
3553	1.65	1205	-8.145	731	7.716	3319	-1.926	3059	-2.812	1754	9.514	210	-7.473	11.3	8.374
3553	2.231	1204	-8.76	816	-7.813	3315	-1.479	3195	-1.761	1754	8.97	208	-7.415	11.3	8.621
3553	1.629	1205	-6.6	734	8.184	3312	-0.935	3196	-0.746	1738	9.516	211	-7.615	11.3	8.872
3553	1.748	1206	-9.767	827	12.291	3315	-0.369	3177	-1.468	1734	8.148	202	-16.674	11.3	9.362
3553	-0.011	1201	-11.525	764	8.078	3318	0.362	3177	-1.6	1726	9.13	201	-7.543	11.3	8.057
3553	-0.044	1206	-9.394	842	-1.922	3323	0.304	2649	-1.511	1724	6.498	202	-14.026	10.3	7.436
3553	2.713	1197	-9.694	748	6.395	3315	-1.315	2612	-1.579	1718	8.389	209	-8.084	10.3	8.143
3466	-0.104	1209	-10.044	758	5.341	3305	-0.96	2632	-3.349	1718	6.934	210	-7.087	10.3	8.709
3466	0.193	1214	-8.359	776	8.204	3308	-1.273	2632	-3.102	1717	6.174	203	-8.4	10.3	7.896
3466	-0.27	1196	-9.78	2700	-0.299	3313	-1.171	2675	-3.625	1723	6.796	215	-6.351	10.3	7.86
3466	0.539	1208	-7.291	2700	0.03	3325	-0.029	2733	0.548	1731	5.477	208	-7.036	10.3	8.073
3466	0.01	1193	-9.791	2700	1.978	3315	1.017	2657	-0.072	1726	6.68	212	-6.952	10.3	7.578
3466	0.286	1215	-8.366	2700	0.843	3310	-0.143	2673	-7.433	1715	7.547	212	-6.041	10.3	7.684
3466	0.551	1210	-9.516	2700	2.612	3313	0.708	2664	-4.218	1720	9.992	216	-6.616	10.3	7.93
3466	-0.326	1229	-9.622	2700	0.839	3302	-1.878	2649	-3.741	1726	5.527	213	-13.653	10.3	8.317
3466	-0.492	1205	-8.577	2700	0.565	3374	-0.296	2640	-2.102	1719	6.185	211	-7.767	10.3	7.47
3466	-0.14	1199	-8.914	2700	-0.755	3340	-2.393	2664	-2.051	1717	9.417	193	-4.183	10.3	8.141
3466	-1.473	1215	-11.198	2540	0.886	3432	0.052	2695	-1.96	1715	7.475	192	-2.936	10.3	8.922
3466	-0.277	1197	-7.634	2540	-3.663	3324	2.028	2619	-1.858	1728	8.318	193	-3.644	10.3	7.861
3466	3.327	1185	-11.303	2660	2.07	3310	-1.598	2664	-1.775	1713	9.209	193	-3.465	10.3	7.753
3466	-0.321	1181	-10.027	2660	7.068	3316	-1.349	2711	-1.578	1713	7.441	194	-3.583	10.3	8.212
3466	0.734	1206	-9.418	2660	6.711	3307	0.992	2695	-1.479	1719	10.865	195	-2.786	10.3	7.86
3466	-1.727	1189	-10.519	2660	4.712	3313	-2.306	2664	-0.06	1718	7.669	193	-4.282	10.3	7.825
3466	-1.241	1185	-9.548	2660	-8.583	3323	0.874	2711	1.956	1725	7.187	193	-2.772	10.3	7.118
3466	-0.165	1257	-6.409	2550	-3.239	3457	0.19	2661	1.142	1714	8.785	194	-2.788	10.3	8.46
3466	-2.395	1263	-7.732	2550	-5.032	3468	1.599	2684	-2.202	1717	7.373	193	-3.722	11.2	7.031
3466	-1.945	1279	-6.753	1880	2.113	3458	-1.09	2626	-2.579	1722	8.909	193	-2.781	11.2	8.832
3455	1.379	1237	-5.999	1880	2.958	3451	-0.42	2654	-1.915	1742	8.527	180	-0.305	11.2	8.197
3455	1.071	1254	-8.608	1880	-0.983	3466	0.726	2610	-3.275	1748	10.013	183	-0.428	11.2	7.845
3455	0.383	1239	-6.296	844	-17.99	3462	0.847	2619	-4.502	1762	8.655	184	0.236	11.2	8.056
3455	0.82	1244	-6.834	844	-16.426	3462	2.154	2619	-3.536	1762	10.169	182	0.252	11.2	7.135
3455	0.873	1250	-6.798	844	-19.437	3465	1.486	2653	4.809	1761	10.64	184	0.2	11.2	7.983
3455	1.928	1250	-6.674	844	-18.501	3476	2.819	2807	4.183	1760	6.067	183.5	0.167	11.2	7.137
3455	1.672	1244	-8.918	844	-18.106	3310	1.239	2807	5.425	1758	9.899	183	-0.358	11.2	8.477
3455	0.407	1247	-7.94	844	-19.189	3314	-0.091	2639	-0.88	1762	8.085	183	-0.529	11.2	8.302
3455	0.855	1263	-6.808	844	-17.381	3310	0.799	2639	-1.536	1755	8.619	182	0.151	11.2	8.301
3553	0.115	1260	-6.41	844	-17.02	3306	0.243	2636	1.75	1759	9.813	183	2.447	11.2	7.943
3553	-2.147	1269	-5.243	844	-17.546	3306	0.966	2697	1.313	1754	10.665	184	-0.739	11.2	8.304
3553	-2.61	1257	-4.637	844	-15.659	3308	0.823	2697	2.065	1742	7.8	182	-0.689	11.2	8.195
3553	-2.709	1247	-4.426	834	-8.806	3314	2.61	2697	-0.457	1745	8.67	195	0.353	11.2	7.77
3553	-2.344	1254	-11.28	834	-2.644	3307	1.546	2746	-0.939	1759	9.34	194	-1.34	11.2	7.241
3553	-1.041	1238	-6.381	834	-6.495	3310	0.47	1790	-11.394	1748	9.142	195	-0.211	11.2	8.124
3553	-1.101	1231	-6.339	834	-14.205	3309	0.464	1810	-12.27	1746	9.35	196	-11.901	11.2	8.579
3553	-1.334	1253	-5.452	834	-6.102	3309	0.348	1790	-9.832	1752	5.673	195	-21.617	11.2	8.269
3553	-0.947	1257	-7.288	834	-4.821	3317	-0.745	1800	-13.359	1751	6.465	195	-2.341	11.2	8.373
3553	-2.265	1247	-8.98	834	-7.17	3317	-0.192	1790	-12.269	1762	6.547	195	-1.027	14.9	8.594
778	-4.624	1263	-6.561	834	-8.077	3308	-0.911	1790	-11.82	1753	9.656	195	-0.858	14.9	9.368
778	-4.272	1257	-6.9	834	-3.795	3317	-1.937	1780	-14.616	1716	7.592	195	-0.056	14.9	8.488
778	-5.144	1268	-7.533	834	-5.172	3314	0.974	1780	-14.3	1839	8.673	194	-0.162	14.9	10.04
778	-3.907	1254	-8.136	834	-3.364	3298	1.176	1780	-12.674	1727	8.33	195	1.863	14.9	8.881
778	-4.252	1270	-4.711	834	-5.678	3298	-0.377	1780	-12.223	1733	9.053	195	-0.895	14.9	9.76
778	-4.313	1272	-5.567	834	-10.154	3288	-2.364	1780	-13.847	1726	6.588	194	-2.479	14.9	9.479
778	-4.769	1277	-6.32	834	-4.243	3318	0.123	1780	-11.645	1736	7.143	200	-4.607	14.9	9.405
778	-6.456	1070	-7.391	834	-4.598	3317	-1.464	1780	-13.177	1735	9.212	201	-4.032	14.9	9.089
778	-3.079	1070	0.939	834	-7.9	3313	-1.568	1708	-15.509	1730	7.245	201	-4.145	14.9	9.619
778	-3.11	970	-2.496	834	-5.602	3311	0.122	2780	0.79	1728	5.988	200	-3.14	14.9	12.368
778	-5.669	1070	-0.47	834	-6.937	3312	-1.24	2800	1.784	1729	7.743	199	-3.218	14.9	9.727
778	-3.697	1070	-0.425	834	-3.435	3315	-2.14	2760	1.723	1733	6.161	200	-4.053	14.9	9.972
778	-4.875	1070	-0.14	834	-15.371	3309	-3.66	1760	-17.469	2483	-3.067	199	-4.226	14.9	8.986
778	-3.77	1070	-0.14	834	-7.384	3299	1.327	1760	-19.777	1729	7.923	201	-4.069	14.9	9.763
778	-3.509	1070	-3.571	834	-6.861	3315	0.654	1760	-15.385	1724	6.597	199	-3.373	14.9	10.926
778	-3.987	1070	-0.66	834	-2.52	3303	-0.554	2800	2.433	1725	10.229	199	-4.184	14.9	9.974
778	-3.777	1070	2.003	834	-4.828	3300	-0.918	2750	0.653	1730	10.945	200	-3.559	14.9	10.184
778	-3.957	1070	-0.665	834	-6.878	3306	-0.668	2800	2.266	1945	-5.17	200	-4.267	14.9	9.728
778	-6.848	1070	-0.304	834	-5.665	3296	-1.04	2810	2.136	1720	7.491	206	-1.991	14.9	9.48
778	-3.651	1070	-0.668	834	-5.134	3308	0.083	1790	-11.451	1733	5.711	202	-2.273	14.8	9.685
778	-5.171	1070	-0.091	834	-5.493	3311	0.797	2760	2.796	2492	0.522	202	-4.533	14.8	11.063
778	-4.872	913	-4.762	834	-6.271	3310	0.627	2730	0.911	1764	6.888	205	-0.679	14.8	12.121
3282	-0.804	1150	3.721	828	-7.587	3306	0.462	2770	1.989	1740	9.378	204	-2.965	14.8	9.296
3250	-1.369	1150	2.392	827	-5.071	3308	1.466	2830	2.497	1841	8.139	202	-3.707	14.8	12.051
3229	-1.108	1150	2.974	828	-6.405	3296	-0.357	2800	-5.787	1851	-4.644	201	-0.906	14.8	12.652
3254	-2.038	1150	2.898	828	-9.525	3297	0.799	2760	1.607	1851	6.221	208	-2.927	14.8	10.642
3261	-2.099	1150	2.989	787	-7.631	3413	3.981	2810	1.854	1748	2.21	202	-3.295	14.8	14.482
3290	-0.67	1150	3.279	826	-6.869	3445	0.739	2810	2.894	1743	6.545	206	3.076	14.8	10.217
3290	-1.3	1150	3.58	829	-7.069	3314	1.412	2810	3.198	1729	6.105	200	-2.73	14.8	9.196
3267	-0.976	1150	3.834	830	-5.567	3323	2.085	2810	2.618	2487	2.772	206	1.791	15.1	12.403
3147	-2.011	1150	4.453	829	-10.64	3307	1.029	2620	-1.024	2773	1.816	203	-0.059	15.1	15.337
2590	-4.674	1150	4.416	833	-7.774	3313	1.043	2820	3.65	1753	2.329	205	1.628	15.1	15.045
2405	-7.098	1150	3.427	832	-7.76	3320	0.046	2790	1.72	2399	1.527	191	7.824	15.1	11.383
2617	-3.207	1150	4.388	828	-4.106	3323	3.969	2780	4.035	1854	8.348	192	8.137	15.1	15.085
2571	-4	1150	4.683	823	-8.069	3323	2.17	1750	-15.403	1853	7.71	192	8.708	15.1	14.589
2527	-4.486	1150	4.381	833	-9.828	3310	0.953	1770	-15.094	1849	9.17	190	8.166	15.1	15.082
2622	-3.233	1150	2.547	827	-6.9	3322	2.018	1740	-16.052	1848	9.603	190	6.977	15.1	13.636
2609	-3.922	1167	1.416	805	-11.002	3314	0.88	1740	-13.923	1854	7.189	192	6.684	15.1	12.69
2486	-5.567	1167	1.931	814	-4.031	3317	1.315	1750	-15.485	1853	6.573	201	6.206	15.1	13.248
2612	-3.498	1167	0.784	826	-5.192	3308	0.843	1630	-21.953	1856	8.251	192	5.274	1984	1.209
2606	-3.83	1167	0.282	826	-7.96	3313	1.155	1670	-16.056	1822	8.71	192	6.606	1984	-0.692
2614	-4.306	1167	0.704	825	-8.672	3346	0.941	1730	-17.303	1859	8.475	191	-4.242	1984	0.099
2616	-3.247	1167	2.393	832	-7.321	3309	-4.883	1740	-15.337	1856	6.056	191	5.779	1984	1.004
2570	-4.081	1167	1.185	881	-5.587	3308	0.313	1770	-13.864	1739	2.644	192	7.032	1984	0.76
2467	-5.858	1167	1.681	879	-11.009	3309	-0.574	1700	-16.105	2547	-1.927	192	6.217	1984	0.852
2554	-4.066	1167	1.704	881	-5.866	3312	2.702	1760	-14.787	2475	-1.472	191	7.008	1984	-0.84
2607	-3.006	1167	0.512	861	-6.919	3302	0.2	1760	-15.554	2936	-1.917	190	7.094	1984	-0.591
2614	-2.812	1167	2.164	882	-6.879	3412	1.655	1770	-16.623	2476	-1.583	192	7.19	1984	-0.47
2602	-3.673	1167	2.316	883	-6.863	3432	0.735	1690	-14.951	1732	3.26	190	6.485	1984	-0.725
2597	-3.153	1167	2.192	881	-6.744	3427	0.35	1710	-15.906	1749	2.614	137.8	11.898	1984	0.793
2607	-5.458	1167	1.353	882	-8.738	3307	1.307	1830	-11.735	2469	-1.292	131.5	12.079	1984	-0.335
2648	-3.042	1167	0.373	882	-9.487	3283	-0.68	1770	-11.244	2470	-1.574	135	11.095	1984	0.533
2658	-5.07	1096	2.575	883	-6.82	3302	-0.134	1770	-10.864	2498	-1.652	137.6	12.391	1984	-1.04
2639	-4.95	1096	3.317	834	-5.52	3307	-0.14	1750	-13.24	2756	-6.095	136.4	12.016	1984	1.169
2081	-10.347	1096	3.009	884	-5.622	3323	0.834	1770	-11.811	1734	1.98	139.1	12.392	1984	-0.527
1787	-25.264	1096	1.776	881	-6.491	3298	1.072	1870	-9.199	1731	2.929	135.3	12.373	1984	0.894
2550	-7.302	1096	1.674	882	3.297	3288	0.563	1790	-11.056	2487	-0.303	141.2	11.272	1984	-0.425
1865	-21.489	1096	2.481	880	-1.895	3307	-1.986	1790	-11.733	2397	-2.562	134.8	12.81	1984	-0.883
2091	-10.659	1096	2.872	881	-6.84	3302	0.728	1790	-10.535	1778	-2.79	130.5	11	1984	-0.252
2034	-18.828	1096	2.33	872	-0.306	3281	-0.77	1760	-11.017	2504	-0.811	133.9	11.675	1984	0.829
2412	-9.16	1096	3.18	838	-4.908	3283	0.007	1780	-11.075	2468	-1.719	83.1	10.948	1984	0.477
2437	-8.69	1096	2.361	835	-8.451	3299	-0.855	1790	-10.63	1758	3.724	82	10.687	1984	0.026
2537	-6.418	1096	2.947	842	-6.907	3303	-0.131	1790	-10.717	2417	0.212	83.6	11.343	1984	-0.926
2621	-5.406	1096	2.769	841	-0.168	3301	2.842	1740	-11.618	1731	4.441	81.6	10.901	1984	-0.237
2042	6.657	1096	2.64	844	-6.501	3307	-1.897	1800	-9.513	2473	-0.419	82.7	11.355	1984	-0.82
2283	-12.184	1096	2.747	842	-7.547	3291	-0.228	1770	-11.434	1853	-11.246	82	11.044	1984	-1.684
1983	-20.074	1096	1.468	841	-2.461	3305	-0.829	1790	-12.087	2373	-2.946	84	10.637	1984	1.036
2609	-4.098	1050	0.884	840	-4.908	3296	0.27	1790	-11.284	2472	0.12	84.3	11.041	1984	-0.292
2439	-7.47	1492	-1.403	837	-6.084	3302	1.6	1810	-11.309	1721	8.386	83.2	14.988	1984	-0.145
2254	-12.908	1259	-13.262	723	-10.2	3300	2.073	1800	-9.983	1723	7.261	82	11.836	1984	-0.893
2254	-12.851	1050	-0.52	841	-5.765	3299	2.597	2120	-7.562	1739	9.869	81.2	12.177	1984	-0.634
2648	-3.166	1050	0.394	843	-4.769	3307	-0.295	2150	-5.305	1720	8.704	80	11.227	1984	-0.157
2649	-2.492	941	-4.281	851	-7.619	3295	-0.466	2090	-5.461	1741	8.874	83	10.945	1984	-0.433
2641	-3.817	1050	-0.035	854	-10.235	3290	1.294	2160	-2.892	1722	9.622	79.9	12.497	1984	-0.459
2670	-2.708	1243	-1.953	845	-8.896	3294	0.735	2130	-6.465	1735	9.543	78.6	12.518	1984	0.198
2505	-6.24	943	-1.932	849	-6.048	3284	-0.73	2140	-2.554	1724	8.422	79.6	12.449	1984	-0.148
2600	-4.172	981	-0.042	853	-9.557	3304	1.806	2120	-2.352	1725	9.02	79.8	12.395	1984	-0.59
2618	-4.91	1050	-1.43	850	-9.584	3310	1.344	2040	-2.968	1721	8.488	78	12.688	1984	-0.951
2603	-3.816	1050	-0.411	845	-7.6	3310	-1.224	2100	-2.311	1843	10.08	79.4	12.648	1984	0.34
2589	-5.886	1050	-0.311	854	-7.429	3306	1.734	2120	-3.973	1853	10.266	81	12.758	1984	0.455
2442	2.249	1050	-0.31	838	-8.544	3293	1.32	2700	-0.8	1811	9.298	79.3	12.558	1984	-0.124
2594	-4.895	1050	-16.073	835	-5.376	3315	1.972	2120	-3.731	1834	9.967	79.1	11.558	1984	0.161
1619	-26.159	1850	-4.204	837	-6.032	3309	0.47	1780	-12.41	1842	10.074	78.1	10.829	1984	-1.588
2472	-5.735	1850	-5.905	843	-10.192	3308	1.398	1720	-9.618	1832	9.548	80	12.314	1984	-0.882
2542	-6.438	1850	-4.298	836	-8.489	3425	-1.474	1770	-14.233	1791	10.26	78.8	12.142	1984	-1.265
2651	-3.049	1850	-4.897	850	-12.005	3428	0.318	1770	-12.751	1828	10.099	79.2	12.035	1984	0.818
2598	-3.169	1850	-4.428	856	-8.346	3447	-0.538	1750	-13.346	1821	8.693	79.5	12.098	1984	0.059
2198	-3.762	1850	-4.997	848	-6.154	3435	0.942	1780	-20.171	1839	9.767	79.6	12.379	1984	0.19
2540	0.597	1850	-5.021	847	-7.725	3429	3.273	1760	-15.409	1840	9.44	85	14.041	2719	-4.908
2504	-6.838	1850	-5.332	849	-9.34	3425	1.274	1770	-13.436	1866	10.33	84	12.329	2715	-1.455
1541	-28.431	1850	-4.845	854	-5.744	3426	1.363	2450	-5.827	1867	10.424	82	11.268	2702	-5.181
2560	-7.508	1850	-4.437	848	-7.278	3435	1.175	1680	-14.2	1841	9.723	85	10.028	2711	-3.92
2459	-7.629	1850	-4.216	851	-7.442	3425	1.734	2010	-13.708	1848	10.483	84	11.233	2707	-4.112
2339	-10.333	1850	-5.57	856	-6.541	3316	-3.247	1760	-14.337	1853	10.014	84.1	12.032	2718	-3.593
1686	-23.966	1850	-6.097	847	-6.395	3468	0.65	1750	-16.075	1737	8.463	85	15.054	2701	-3.853
2620	-4.456	1850	-5.19	846	-7.887	3463	1.715	1681	5.936	1726	9.033	85	13.854	2640	-6.478
2646	-5.455	1850	-4.868	852	-7.715	3461	1.423	1679	2.152	1757	8.869	85	12.469	2640	-6.265
2593	-5.615	1570	-3.041	1153	-11.076	3434	-1.1	1673	2.99	1733	5.245	83	13.298	2522	-9.986
2637	-5.593	1570	-2.273	1153	-10.28	3425	0.237	1678	4.164	1820	10.303	85	11.86	2667	-6.736
2594	-4.883	1570	-3.374	1153	-9.413	3437	3.33	1668	2.238	1740	8.049	82	10.028	2519	-9.24
2646	-4.027	1570	-1.36	1153	-9.145	3459	-1.095	1680	3.714	1738	10.146	85	11.407	2710	-6.754
2648	-5.523	1570	-3.166	1153	-9.814	3436	0.478	1675	4.686	1735	6.316	84	13.561	2710	-6.575
2653	-4.928	1570	-3.325	1153	-11.847	3438	3.177	1677	5.24	1742	5.059	338	-2.596	2528	-7.643
2646	-4.164	1570	-4.491	1153	-10.418	3481	1.936	1650	3.465	1738	9.642	2444	0.268	2112	-16.894
2609	-5.041	1570	-2.511	1153	-10.026	3448	0.438	1685	2.96	1724	10.226	783	-4.084	2544	-10.051
2487	-7.175	1570	-3.404	1153	-10.091	3459	-1.74	1678	2.836	2275	-3.495	171	-12.483	2026	-20.711
2625	-1.138	1570	-2.699	1153	-9.209	3468	1.588	1674	3.202	1737	10.578	130	-8.087	2213	-15.461
2614	-1.798	1854	-0.213	451	-2.194	3455	1.68	1676	4.64	1721	2.574	949	-8.182	2554	-7.203
2598	-1.695	1854	-1.61	451	-13.627	3431	1.203	1685	5.443	1739	9.404	181	5.025	2554	-7.01
2598	-2.128	1854	-2.274	451	-2.471	3408	0.107	1683	-2.331	1730	1.925	148	-2.359	2289	-13.426
2544	-3.27	1854	-1.105	451	-1.133	3406	0.292	1677	-0.384	1728	8.772	194	-4.322	2874	-5.422
2564	-2.109	1854	-0.223	451	-1.106	3449	2.303	1720	1.169	1724	5.921	892	-1.463	2860	-0.949
2631	-0.883	1854	-2.048	451	-15.352	3466	1.95	1680	1.085	1731	5.365	1728	9.116	2860	-0.121
2540	-2.372	1854	0.387	451	1.02	3421	1.516	1678	0.112	1801	10.171	704	-0.394	2898	-0.267
2548	-3.167	1854	0.021	451	-4.214	3454	1.351	1675	-0.075	1731	8.486	2419	7.547	2850	-1.043
2621	-1.744	1854	-1.612	451	-2.88	3467	0.459	1681	0.032	1739	7.409	221	-15.312	2696	-3.106
2597	-2.882	1854	-1.568	451	-0.97	3454	-0.639	1663	2.129	1849	0.494	497	-15.486	2892	-1.697
2620	-1.022	1854	-1.234	451	0.833	3434	1.178	1680	3.213	1859	-1.349	816	-4.106	2866	-3.09
2595	-1.696	1854	-1.343	1133	-2.88	3469	2.354	1681	2.627	1740	8.888	1240	5.853	2853	-1.486
2610	-2.119	1854	-2.101	1133	-3.45	3428	0.288	1680	2.007	1730	7.134	1030	-13.771	2865	-0.267
2554	-3.556	1854	-0.725	1133	-3.791	3435	2.377	1982	6.976	2453	-1.067	640	-17.113	2888	-4.146
2240	-9.49	1854	-0.337	1133	-2.301	3433	1.141	1665	0.408	1761	-0.851	793	-15.778	2861	-5.17
2226	-8.671	2013	0.986	1133	-3.702	3446	2.809	1668	0.623	1760	-2.772	499	-7.539	2692	-6.032
2483	-3.536	2013	2.791	1133	-2.564	2887	-2.616	1662	4.811	1749	5.998	946	-1.128	2575	-8.337
2588	-0.097	2013	1.809	1133	-3.374	2837	-5.197	1669	4.337	1733	6.056	954	-0.213	2862	-0.013
2213	-9.43	2013	1.042	1133	-3.232	2832	-0.957	1688	4.272	2658	-2.783	506	-5.015	2866	-3.799
2439	-3.951	2013	2.724	1133	-2.984	2833	-2.407	1680	2.262	1731	6.381	145	-1.946	2702	-5.863
2385	-4.653	2013	1.417	414	-3.004	2822	-5.536	1676	4.374	1768	7.205	134	-3.892	2713	-5.721
2578	-1.233	2013	2.054	449	4.509	2819	-6.618	1684	3.943	1734	4.869	208	-0.321	2603	-8.139
1973	-15.32	2013	0.792	450	4.258	3433	0.099	1678	-2.154	1730	7.178	198	-0.498	2744	-1.753
2295	-7.325	2013	1.957	451	5.592	1848	0.063	1697	3.369	1778	1.952	206	0.9	2454	-8.414
2568	-2.713	2013	0.923	453	6.467	1848	-0.68	1664	2.875	1733	4.878	215	0.549	2724	-5.549
2551	-3.704	2013	0.728	453	3.996	1848	-2.496	1688	2.322	1737	7.23	216	-3.28	1446	-30.206
1823	-19.508	2013	1.696	450	2.582	1848	-1.107	1686	3.81	1744	5.552	215	0.546	2853	-1.748
2174	-11.24	2013	2.264	454	2.517	1848	-0.663	944	5.649	1748	6.619	215	-0.886	2659	-8.152
1785	-20.168	1456	7.14	451	2.465	1848	-0.289	940	-1.175	1680	5.062	217	-0.577	2478	-6.294
2270	-8.362	1456	7.731	450	3.441	1848	-1.356	993	-0.031	1741	4.828	1002	-5.565	2855	-1.381
2577	-2.432	1456	7.059	453	4.489	1848	-2.012	935	-0.958	1738	6.358	218	-3.571	2507	-8.662
2555	-3.816	1456	7.796	448	6.986	1848	-1.799	935	-9.082	1747	6.798	219	-3.47	2900	-5.076
1990	-14.792	1456	7.08	451	3.172	1857	-0.665	934	-0.673	1731	3.906	362	-3.069	2797	-1.079
2625	0.072	1456	7.555	447	5.318	1857	-0.609	930	-1.665	2454	0.043	261	-5.111	2790	-1.385
2563	-2.927	1456	7.694	454	2.308	1857	-3.2	987	0.747	1750	5.236	146	13.85	2702	-2.986
2372	-6.629	1456	7.637	450	5.972	1857	0.084	933	-1.118	2869	1.639	106	11.41	2788	-1.25
1941	-14.657	1456	7.965	453	6.05	1857	1.308	935	-4.696	2668	-3.645	27.7	-4.418	2796	-0.374
2009	-10.564	1456	7.457	452	3.013	1857	-1.942	950	2.561	2882	2.151	708	-2.77	2682	-2.583
2030	-9.379	1456	7.659	450	6.414	1857	0.22	935	-2.5	2826	0.359	28.2	-4.951	2783	-0.822
2017	-9.527	1456	7.36	456	5.341	1848	-0.219	993	2.435	2867	1.435	29.5	-4.009	2783	-0.587
2520	-5.519	1456	7.738	457	2.872	1848	-1.195	933	-2.401	2855	0.765	28.6	-4.366	2800	-3.158
2010	-11.932	1456	8.4	443	-3.723	1848	-0.68	947	1.975	2879	1.293	28.4	-4.851	2800	-4.497
2027	-9.745	1467	6.558	431	-1.032	1848	-0.523	935	-0.152	2878	2.467	29.4	-4.72	2775	-0.902
2929	-2.523	1467	7.317	441	-0.598	1848	-2.648	981	0.584	2873	1.824	28.7	-4.255	2791	-0.792
1463	-19.353	1467	6.363	438	-3.054	1848	0.882	931	0.65	2808	0.214	29	-3.613	2792	-0.552
2645	-0.382	1467	7.163	447	-1.867	1848	-0.024	932	3.252	2875	1.538	29	-5.304	2791	-1.638
2038	-10.59	1467	5.417	431	-2.5	1848	0.756	954	3.032	2895	0.951	28.4	-4.287	2796	-0.414
2008	-10.397	1467	6.302	431	-3.247	1848	-0.787	934	-0.257	3201	2.022	28.8	-4.562	2768	-1.146
1721	-19.302	1467	5.734	444	-4.625	1848	-0.874	935	0.777	2795	-1.422	28.1	-4.192	2727	-1.466
2020	-11.972	1467	7.342	428	-2.756	1848	-0.611	970	2.786	2878	0.111	27.9	-3.836	2727	-1.252
2551	-0.027	1467	6.268	426	-1.91	1848	0.313	1659	3.462	2704	-3.454	881	11.046	2736	-0.534
2604	2.569	1467	6.745	427	-0.5	1848	-0.611	1656	2.473	2819	-1.303	28.6	-3.801	2719	-2.242
2348	-6.713	1467	7.242	437	-1.378	2440	4.816	1657	3.487	2841	0.732	29.1	-3.497	2728	-2.18
2707	2.13	1467	7.135	445	-1.272	2440	-0.315	1646	1.839	2868	-0.078	28.6	-2.459	2726	-0.796
1291	-34.344	2010	1.5	436	-2.461	2440	0.834	1622	2.203	2816	-0.993	28.1	-4.723	2739	-2.672
1703	-22.689	2010	1.308	433	-1.595	2440	1.19	1646	1.037	2836	-0.805	29.1	-4.091	2778	-1.921
2000	-8.304	2010	2.509	453	-1.913	2440	-1.547	1646	3.803	2696	-2.936	682	6.951	2780	-3.16
2000	-16.171	2010	1.979	434	-1.141	2440	-0.588	1636	1.399	2696	-2.476	28.6	-3.222	2778	-2.64
2620	2.249	2010	2.864	423	-3.074	2440	-0.019	1641	3.725	3510	-0.548	762	-2.774	2698	-2.944
2000	-4.114	2010	0.603	431	-3.404	1863	2.996	1648	3.239	3510	-1.69	28.5	-4.749	2871	-4.352
2000	-8.483	2010	0.548	429	-2.324	1851	-1.644	1646	4.132	3506	-2.911	28.4	-2.047	2782	-1.863
2553	-4.73	2010	0.916	421	-2.488	1864	3.005	1665	3.097	3486	-1.568	931	10.057	2720	-2.641
2468	-5.225	1213	3.718	436	-5.877	1855	0.414	1656	4.249	3485	-1.558	767	-0.327	2720	-2.799
2575	-2.299	1213	-0.119	418	-2.695	1859	2.929	1647	2.194	3077	-10.344	774	-0.172	2825	-3.233
2717	-2.802	1213	5.76	424	-3.354	1862	-0.339	1645	2.407	3394	-4.345	774	0.848	2747	-1.952
2706	-3.586	1213	4.362	430	-6.405	1858	3.889	1648	4.335	3388	-5.993	773	-0.266	2742	-1.995
2576	3.8	1213	2.989	438	-2.993	1858	-3.111	1669	4.46	3384	-5.938	765	0.698	2751	-1.966
2705	3.778	1213	2.648	435	0.507	1858	0.106	1647	3.049	3383	-4.398	769	0.012	2858	0.474
2687	-2.052	1213	4.846	429	-0.491	1858	5.963	1713	4.961	3375	-4.917	804	2.855	2695	-1.901
2000	-9.797	1213	5.428	474	6.799	1582	2.813	1649	2.976	3407	0.796	774	-0.135	2690	-5.841
2000	-7.973	1213	4.119	467	9.572	1582	2.883	1658	1.788	3383	-1.953	770	0.185	2706	-3.386
2707	-0.041	1213	3.74	481	9.818	1582	2.563	1653	5.578	3365	-1.307	775	0.399	2611	-5.637
2710	-1.506	1213	4.57	478	10.856	1582	2.28	1611	3.105	3361	-2.003	750	-0.094	2711	-4.896
2064	-0.129	1213	4.585	469	10.74	1582	3.593	1554	1.063	3355	-2.204	769	-0.036	2714	-4.256
2059	-1.219	1213	2.741	473	9.788	1582	4.232	1598	0.997	2610	-5.488	764	-0.551	2716	-3.774
2056	-0.368	1204	2.283	472	10.33	1582	-0.062	1618	1.939	2604	-1.719	761	-0.257	2717	-2.378
2048	-0.487	1204	2.622	477	9.606	1582	4.799	1741	-0.778	2604	-1.625	774	0.44	2717	-4.035
2046	-0.525	1204	3.501	473	9.919	1582	4.551	1627	-3.119	2604	-4.187	772	-1.324	2715	-3.587
2051	-1.057	1204	3.62	472	10.175	1582	2.174	1682	5.734	2604	-3.493	772	-0.303	2794	-3.955
2060	-1.061	1204	3.562	475	8.409	1582	0.931	1587	1.706	2604	-3.747	769	0.675	2706	-4.027
2062	-0.562	1204	3.251	473	10.045	1596	2.482	1583	-0.9	2604	-3.041	787	0.76	2781	-1.527
2066	-0.973	1786	-2.746	478	10.667	1596	3.62	1610	2.98	2604	-4.152	774	0.477	2708	-2.332
2075	-0.689	1786	-2.2	468	9.01	1596	2.056	1636	-0.919	2604	-3.685	773	0.286	2809	-4.703
2053	-0.922	1786	-2.249	474	8.791	1596	1.809	1597	1.318	2604	-4.167	763	0.199	2715	-3.808
2064	-0.627	1786	-2.789	463	8.646	1596	1.336	1606	-1.173	2604	-3.606	753	0.423	2712	-8.133
2057	-0.611	1786	-6.284	467	8.037	1596	4.044	1187	3.048	2604	-3.716	772	-0.235	2632	-5.84
2061	-0.472	1786	-3.444	471	8.338	1596	2.905	1192	1.683	2604	-4.839	244	-13.567	2692	-3.714
2067	-0.869	1786	-2.123	470	7.982	1596	3.513	1185	-0.591	2604	-3.533	241	-12.693	2808	-5.028
3250	3.447	1786	-2.966	461	5.608	1596	3.086	1185	0.658	2604	-2.872	241	-14.387	2705	-3.547
3090	-0.742	1786	-3.709	479	6.564	1596	2.34	1176	0.554	2604	-4.577	241	-12.546	2663	-5.761
3250	2.101	1786	-3.349	464	5.905	1596	2.202	1190	0.68	2604	-17.681	242	-10.936	2829	-1.321
3250	4.642	1786	2.74	474	7.725	1591	5.708	1183	0.33	2604	-4.404	240	-12.082	2632	-6.035
3250	-2.833	1486	10.075	472	8.681	1591	6.806	1193	1.931	2639	-0.238	241	-9.861	2558	-7.171
3250	1.461	1486	9.975	469	7.165	1591	5.033	1197	2.112	2627	-2.796	241	-9.286	2800	-1.542
3250	0.455	1486	9.854	473	8.207	1591	5.742	1175	0.793	2607	-0.194	243	-9.678	2764	-6.331
3250	4.435	1486	9.472	481	7.484	1591	7.509	1186	2.482	2585	-2.009	244	-13.074	2772	-5.9
3090	-1.721	1486	10.579	464	4.023	1591	6.415	1174	2.549	2564	-1.83	239	-11.718	2784	-5.277
3250	3.643	1486	9.81	478	7.144	1591	6.204	1178	1.773	2634	-0.562	243	-11.514	2799	-6.186
3090	-4.781	1486	10.392	469	6.747	1591	4.82	1147	1.643	2632	-1.174	243	-9.576	2799	-5.018
3250	1.916	1486	9.809	476	5.515	1591	5.059	1171	-0.188	2624	0.751	240	-13.865	2779	-6.529
3250	-1.126	1470	6.618	493	5.242	1596	5.958	1155	2.259	2595	-0.933	245	-13.349	2757	-5.052
643	8.579	1470	5.982	474	7.912	1596	4.931	1178	-0.076	2586	-8.915	242	-8.678	2738	-7.422
644	9.91	1470	7.525	493	5.615	1596	6.31	1185	0.366	2522	-4.765	311	-14.859	2738	-7.735
643	9.138	1470	6.76	493	5.875	1596	6.093	1131	2.039	3422	-2.012	244	-12.794	2781	-6.101
644	11.076	1470	7.095	484	5.668	1596	5.741	1705	2.37	3145	-4.258	991	0.591	2782	-6.877
649	10.074	1470	8.26	486	5.223	1596	5.413	1649	0.21	3141	-2.241	519	-9.562	2761	-7.143
652	9.717	1865	-2.257	473	5.304	1596	7.344	1652	1.438	3140	-1.644	1646	-7.234	2767	-7.021
618	10.233	1865	-2.831	462	7.49	1618	4.546	1633	3.257	3140	-2.966	535	-23.347	2792	-4.836
642	10.852	1865	-1.609	476	3.099	1619	3.73	1643	2.747	3138	-2.59	504	-14.85	2774	-5.221
656	10.228	1865	-1.522	465	5.748	1620	4.122	1654	2.592	3132	-0.56	245	-7.936	2776	-6.082
655	7.231	1865	-2.842	474	6.423	1621	1.859	1649	2.235	3108	-3.162	529	-14.103	2765	-6.696
642	9.856	1865	-1.818	474	6.366	1622	3.506	1656	4.476	3018	-4.928	844	-15.42	2748	-6.073
620	-8.029	1865	-2.373	474	5.065	1623	5.328	1655	1.932	3531	-1.279	1785	7.304	2776	-4.539
619	-5.69	1865	-3.058	474	5.94	1624	3.861	1652	2.222	3531	-0.697	959	-1.45	2799	-5.2
615	-7.12	1865	-1.85	529	-11.23	1625	4.306	1642	2.466	3530	-2.418	243	-13.821	2787	-5.438
631	-4.594	1865	-1.189	520	-11.548	1626	4.354	1663	2.222	3529	-0.985	320	-2.878	2788	-5.175
624	-4.87	1865	-3.877	524	-11.266	1625	3.779	1662	1.576	3523	-1.92	247	-14.14	2745	-7.025
639	-5.281	1865	-1.723	533	-12.459	1625	4.882	1657	1.875	3521	-0.308	415	-10.211	2792	-5.239
630	-3.106	1865	-1.777	537	-12.162	1625	4.879	1659	1.614	3521	0.713	949	-10.408	2808	-5.574
667	-0.225	1865	-2.192	523	-11.939	1625	4.705	1656	2.372	3521	-0.456	232	12.093	2750	-7.07
623	-8.213	1865	-2.118	516	-10.415	1625	5.346	1478	4.587	3375	-2.267	235	12.56	2755	-6.005
666	-7.733	1865	-3.269	544	-13.397	1625	3.552	1443	1.598	3370	-1.694	236	13.659	2783	-6.609
585	-8.701	1444	7.682	514	-12.634	1625	4.046	1494	1.668	3366	-1.276	234	11.632	2746	-7.005
693	-10.599	1444	6.577	514	-11.429	1625	4.101	1471	4.769	3366	-3.794	234	12.317	2811	-5.521
676	-12.039	1444	7.223	514	-11.813	1587	4.943	1425	1.418	3361	-1.457	237	11.993	2782	-6.235
664	-10.942	1444	8.078	557	-10.315	1587	5.757	1480	3.047	3356	-1.173	237	10.196	2798	-4.977
660	-11.73	1444	7.968	514	-10.738	1587	4.909	1500	2.996	3213	-3.543	235	12.68	2799	-1.819
674	-11.127	1444	7.453	512	-12.831	1587	4.554	1491	5.073	3178	-3.177	230	13.379	2815	-4.929
639	-10.999	1444	8.568	512	-12.729	1587	3.274	1483	3.657	3096	-6.682	238	12.046	2792	-4.941
668	-10.431	1444	5.74	524	-14.173	1587	4.696	1466	4.864	3510	0.626	239	13.212	2784	-6.28
678	-10.229	1444	7.109	520	-11.489	1587	6.825	1461	2.982	3510	-1.342	237	12.004	2784	-4.985
675	-10.631	1444	7.56	522	-11.309	1587	4.696	1455	3.754	3535	-0.073	236	11.763	2662	-8.36
679	-10.436	1444	7.707	523	-12.229	1587	5.442	1482	3.887	3517	0.103	238	11.46	2662	-8.44
671	-7.63	1444	7.262	507	-11.075	1587	4.942	1485	5.775	3517	-3.109	236	12.074	2779	-5.154
617	-10.522	1444	6.87	516	-10.87	1599	1.732	1483	3.532	3507	1.435	231	12.137	2799	-5.26
605	-8.227	1444	7.141	429	-5.254	1599	1.591	1488	5.427	3460	-1.967	235	11.098	2818	-4.737
661	-8.493	1848	-5.918	431	-5.075	1599	3.928	1506	5.457	3371	-1.228	235	12.494	2816	-5.905
609	-9.996	1848	-6.664	448	-4.756	1629	5.234	1486	2.603	3368	-0.877	232	11.087	2850	-4.332
570	-11.331	1848	-6.415	421	-4.373	1629	6.915	1169	11.265	3365	-1.782	238	11.213	2834	-4.842
530	-8.857	1848	-6.114	423	-4.088	1629	3.608	1297	9.068	3363	-2.48	235	12.692	2834	-4.238
572	-13.239	1848	-6.724	1322	2.791	1629	5.592	1281	4.329	3356	-0.86	238	12.217	2853	-4.305
500	-20.831	1848	-6.834	435	-4.113	1629	4.431	1283	4.709	2870	-12.245	232	11.678	2850	-4.103
577	-8.284	1848	-7.023	433	-5.992	1629	-10.557	1275	6.687	2597	-24.488	23.8	5.909	2791	-6.316
594	-9.285	1848	-4.57	428	-3.805	1629	6.279	1268	7.119	2592	-21.264	24.4	13.164	2810	-4.93
586	-12.385	1848	-6.631	426	-2.983	1629	6.402	1142	6.94	2536	-14.618	230	11.68	2857	-5.648
618	-19.151	1848	-2.387	427	-9.32	1629	3.378	1270	4.596	2536	-15.541	35	9.567	2789	-5.542
617	-18.001	1848	-8.143	446	-2.544	1751	-2.828	1270	4.349	1873	-2.448	353	13.325	2850	-3.714
617	-18.606	1798	-0.128	431	-14.955	1748	-3.227	1033	0.663	1857	-3.672	194	9.556	2846	-5.29
579	-18.219	1798	-5.62	447	-4.638	1723	-4.26	1036	-0.869	1851	-4.011	36	9.483	2802	-6.531
627	-18.071	1798	-6.218	465	7.907	1735	-3.54	1206	-0.725	1851	-3.784	335	12.5	2802	-4.979
623	-18.134	1798	-6.933	448	4.424	1951	1.494	1240	-0.044	1829	-3.934	32.5	7.823	2842	-4.315
619	-16.511	1798	-7.225	440	8.782	1755	-2.679	1212	0.359	1851	-2.021	346	11.623	2846	-4.539
631	-17.775	1798	-5.083	455	9.305	1768	-2.39	1500	6.456	1866	-2.158	326	12.76	2870	-5.189
630	-16.762	1798	-4.978	474	5.482	1758	-2.837	1215	-1.973	1845	-2.556	276	11.916	2745	-2.924
621	-16.284	1798	-5.533	441	5.56	1872	0.038	1154	-1.716	1861	-1.911	36	9.983	2745	-3.516
611	-15.481	1798	-6.226	478	4.039	1749	-3.192	1172	-3.018	1858	-4.096	34.3	8.952	2738	-3.262
614	-26.219	1798	-4.614	476	6.171	1718	-3.503	1637	3.503	1842	-4.802	348	12.961	2749	-2.461
612	7.317	1798	2.29	442	9.321	1792	-2.324	1630	1.396	1807	-4.864	34.1	8.012	2747	-2.801
606	-32.069	1798	-4.787	443	8.053	1736	-3.766	1640	1.563	1805	-3.087	342	12.732	2704	-4.477
631	-3.643	1798	-6.694	467	4.633	1720	-3.82	1642	1.186	1789	-2.724	34.7	10.228	2731	-3.75
592	-31.885	1798	-4.648	462	4.598	1770	-2.972	1626	0.904	1811	-1.48	32.5	9.138	2746	-3.28
619	-17.396	1876	5.221	442	7.159	1794	-2.734	1623	0.945	1807	-1.99	32.7	9.023	2721	-2.762
621	-10.962	1876	4.969	441	7.063	1809	-3.39	1625	-0.049	1794	-4.468	358	15.632	2735	-2.489
598	-30.85	1876	4.529	450	5.433	1808	-2.895	1618	1.115	1796	-2.756	33.8	9.442	2742	-2.667
579	-26.024	1876	4.795	450	9.566	1779	-2.23	1624	1.717	1811	-2.986	333	15.68	2735	-2.589
615	-27.757	1876	4.589	504	7.507	1813	-2.445	1630	1.268	1854	2.195	34.7	11.361	2718	-4.469
604	-29.263	1876	4.8	440	6.125	1787	-2.463	1630	1.212	1869	2.065	361	15.662	2718	-3.641
2060	-0.874	1876	5.339	441	9.819	1782	-4.228	1630	0.401	1861	-1.47	33	11.909	2718	-3.103
568	-2.53	1876	4.976	450	7.321	1802	-3.631	1630	0.269	1861	1.057	32.3	6.662	2582	-7.16
595	-9.939	1876	3.446	450	9.489	1776	-3.726	1630	2.369	1873	-1.785	34.2	11.603	1735	-24.082
568	-9.653	1876	3.946	449	9.469	1759	-3.857	1630	0.936	1860	1.747	349	15.317	2428	-9.716
571	-4.59	1876	5.317	450	11.421	1767	-3.774	1630	-0.771	1861	-0.507	349	13.991	2670	-3.942
2105	-7.381	1876	5.18	463	6.537	1801	-3.612	1630	0.57	1852	1.177	364	13.634	2670	-4.8
571	-6.773	1508	9.82	441	8.236	1765	-3.226	1630	1.975	1859	1.791	347	12.223	2408	-10.568
605	-3.753	1508	10.727	445	9.746	1814	-3.295	1682	3.513	1916	3.501	345	12.164	2636	-5.579
533	-2.825	1508	9.987	419	-1.775	1796	-4.068	1672	2.638	1889	1.92	362	14.225	2406	-10.075
554	-0.537	1508	11.229	418	-1.973	1782	-3.135	1676	3.866	2743	1.081	349	12.244	2305	-9.557
669	9.003	1508	10.397	418	-2.008	1764	-4.208	1685	1.744	1916	4.221	361	10.93	2553	-6.767
587	-5.162	1508	10.119	413	-2.166	1758	-3.548	1674	3.391	1888	1.757	346	11.494	2524	-9.292
513	-12.251	1508	10.007	423	-0.892	1781	-4.032	1680	2.295	2085	7.879	361	14.306	2631	-6.424
544	-5.651	1508	10.19	425	-2.077	1785	-3.907	1683	4.604	2160	1.25	399	14.36	2631	-5.362
546	-21.241	1508	9.511	421	-1.589	1748	-4.681	1683	4.253	1910	-1.832	351	12.626	2205	-15.165
559	-3.964	1508	11.132	425	-1.095	1796	-3.066	1675	1.148	1855	-8.668	349	11.33	2711	-4.849
578	-23.406	1508	10.504	420	-1.863	1759	-2.093	1670	1.564	1862	-8.301	1893	-7.141	2848	-1.296
537	-11.139	1508	9.764	425	-1.225	1757	-3.688	1668	5.446	1842	-11.584	1893	-6.408	2715	-5.665
542	-9.891	1508	10.211	429	-1.75	1750	-4.33	1183	3.789	1857	-7.626	1893	-9.123	2707	-3.938
545	-9.906	1508	10.595	419	-3.131	1679	0.678	1196	5.546	1858	-6.921	1893	-7.372	2714	-4.178
545	-6.514	1508	10.058	417	-2.782	1710	-1.567	1188	9.534	1869	-7.475	1893	-7.235	2731	-3.571
533	-9.057	1508	10.114	419	-2.231	1703	2.415	1212	7.038	1833	-11.794	1893	-6.05	3016	-0.114
556	-8.329	1508	9.187	422	-2.331	1685	0.926	1190	4.975	1866	-9.24	1893	-7.755	2706	-5.563
525	-10.177	1430	7.768	423	-2.42	1703	1.888	1190	4.781	1850	3.751	1893	-6.463	2726	-3.302
540	-11.559	1430	8.956	422	-4.382	1714	0.615	1190	5.951	1878	0.383	1893	-8.586	2713	-4.142
542	-10.093	1430	7.481	429	5.119	1722	1.76	1190	4.655	1906	-4.736	1893	-7.323	2682	-4.828
536	-9.096	1430	7.549	429	5.269	1729	0.45	1190	4.675	1850	-7.979	1557	-11.047	2705	-4.368
1908	-3.345	1430	7.414	444	4.698	1734	1.494	1190	7.083	1822	-8.548	1557	-13.949	2705	-5.221
1900	-5.775	1430	8.085	440	4.664	2490	1.795	1190	8.618	1871	-5.297	1557	-16.966	2534	-7.921
1908	-3.116	1430	8.004	432	4.466	2478	-1.618	1190	6.746	1859	-8.3	1557	-16.012	2592	-5.941
1900	-5.719	1430	8.905	441	1.686	2484	-1.991	1190	6.338	1853	-7.397	1557	-13.507	2526	-9.152
1908	-3.494	1430	7.482	438	5.252	2490	7.264	1190	9.608	1867	-6.125	1557	-12.397	2728	-3.555
1908	-2.694	1430	8.585	438	7.115	2509	5.101	1626	0.686	1872	-4.691	1557	-14.867	2202	-15.083
1908	-4.432	1430	8.64	448	4.58	1717	-7.544	1639	1.627	1852	-7.404	1557	-15.452	2722	0.597
1908	-4.663	1430	9.812	439	5.196	1692	-8.424	1632	0.777	1845	-9.025	1557	-5.899	2705	-6.122
1908	-3.089	1430	8.27	441	6.138	1712	-7.976	1628	0.866	1862	-8.479	1557	-14.642	2728	-3.816
1908	-3.254	1430	8.254	449	2.888	1726	-7.488	1633	0.892	3607	-0.734	943	-4.98	2710	-4.825
1900	-5.336	1430	8.455	440	4.874	1732	-7.892	1623	0.925	3607	-0.308	925	-4.402	2706	-5.422
1908	-4.971	369	2.767	448	4.709	1688	-8.095	1634	1.343	3607	-0.782	950	-4.396	2703	-5.604
1908	-4.104	381	3.183	440	4.818	1712	-7.328	1634	2.51	2700	-10.943	936	-4.34	2794	-0.376
1901	-4.502	376	1.85	424	1.995	1711	-6.383	1634	0.149	3607	0.483	928	-3.611	2776	-1.418
1894	-3.951	382	3.43	429	-3.88	1715	-7.057	1634	2.269	2700	-8.835	949	-4.044	2734	-6.232
1894	-3.279	378	1.78	424	2.979	1716	-7.514	1633	1.927	3607	-1.336	1006	-1.868	2580	-6.948
1901	-2.457	362	2.256	425	-0.773	2025	-3.985	1634	1.769	3607	-1.858	945	-5.752	2399	-12.657
1894	-3.192	354	3.979	432	-0.244	1997	-5.108	1634	2.234	2700	-9.146	937	-4.756	2638	-4.811
1894	-3.536	394	4.309	2300	-2.753	2032	-4.06	1388	4.413	3607	-1.591	916	-4.169	2477	-11.418
1901	-2.448	371	3.276	454	-1.198	2018	-3.395	1388	5.156	3607	-1.137	937	-4.736	2658	-5.73
1901	-2.981	370	1.92	504	6.89	2006	-5.46	1388	4.879	3607	-0.136	961	-3.575	2658	-5.764
1894	-3.316	380	4.168	432	2.429	1992	-5.142	1383	-5.954	3607	1.667	945	-4.391	2650	-5.864
1901	-3.182	378	2.002	432	-1.326	2009	-5.093	1383	-3.504	3607	-0.52	929	-2.94	2650	-4.504
1901	-1.436	398	2.276	432	0.286	2010	-5.762	1383	-6.201	2700	-11.219	929	-4.488	2632	-6.626
1894	-22.273	379	4.114	429	2.799	1997	-5.449	1383	-6.18	2700	-9.697	931	-3.296	2632	-6.408
1901	-3.213	396	2.917	437	1.803	1690	1.341	1383	-5.913	3607	1.7	938	-5.486	2636	-5.327
1894	-4.506	363	0.465	427	1.465	1689	4.222	1383	-6.206	3607	0.9	938	-3.327	2644	-6.443
1901	-4.869	375	1.17	432	1.956	1690	2.009	1368.4	-6.488	3607	-0.457	938	-3.57	2608	-6.541
1901	-3.527	371	2.095	435	1.549	1693	0.689	1368.4	-5.632	3607	0.797	938	-4.444	2608	-8.067
1901	-3.463	811	-3.718	438	0.745	1672	3.479	1368.4	-5.731	3607	0.019	938	-5.228	2627	-6.402
1894	-3.915	364	3.941	426	1.454	1700	5.974	1368.4	-5.57	3607	-1.62	938	-3.76	2627	-7.075
1901	-4.28	354	0.241	425	2.336	1710	3.19	1368.4	-4.418	3607	0.253	938	-3.676	2644	-6.981
2126	-4.286	599	-8.343	436	1.124	1676	1.208	1368.4	-4.554	3607	-1.042	938	-4.639	2644	-7.448
2126	-3.028	328	-0.391	425	1.467	1694	3.381	1372	-7.056	3607	1.11	938	-4.413	2647	-6.557
2126	-1.822	359	-5.981	433	1.906	1675	2.86	1372	-6.52	3607	-0.348	938	-3.722	2647	-6.266
2126	-1.436	376	-3.27	429	2.277	1731	0.022	1372	-6.081	3607	-0.111	938	-4.401	2619	-6.453
2126	-1.594	367	-3.213	423	2.043	1754	-1.268	1372	-7.378	3607	0.296	938	-4.489	2452	-12.831
2126	-3.24	368	-1.665	424	0.994	1758	0.985	1372	-9.041	3607	1.065	2394	1.05	2610	-8.326
2126	-2.658	363	0.345	462	-0.697	1716	-0.974	1372	-9.449	3607	0.905	2394	1.461	2715	-6.095
2126	-3.495	362	0.34	448	-0.176	1737	0.439	2610	-0.592	2700	-6.926	2473	3.41	2566	-9.341
2126	-2.949	360	-0.329	449	1.081	1712	-0.361	2610	-0.325	2677	-15.206	2472	2.438	2608	-4.939
2174	2.73	371	-4.688	431	-0.543	1709	-1.065	2610	-1.481	2677	-18.022	2451	1.09	2613	-8.224
2174	2.374	379	-5.068	452	-8.891	1714	0.083	2610	-1.001	2677	-16.665	2507	2.078	2482	-10.165
2174	1.181	370	0.781	477	0.72	1735	0.659	2610	-1.072	2677	-16.649	2447	1.104	2605	-9.624
2174	1.769	352	-1.924	440	0.418	1705	-0.501	2610	-1.143	2677	-16.813	2456	1.763	2615	-8.946
2174	2.555	367	-1.32	442	-10.342	1726	0.981	2610	-0.005	2677	-16.798	2493	2.212	2635	-7.018
2174	3.113	359	-0.208	438	0.349	1713	0.558	2610	-1.428	2677	-16.385	2472	2.217	2598	-7.169
2174	2.73	361	-2.934	444	-0.118	1609	1.566	2610	-1.197	2677	-14.61	2455	0.296	2630	-5.922
2174	1.731	277	-1.972	445	1.316	1629	-0.768	2610	0.048	2677	-17.134	2530	3.235	2026	-19.201
2174	0.569	366	-1.939	443	0.735	1638	0.065	2610	-0.201	2677	-18.354	2521	3.007	2625	-6.051
2174	1.217	363	-2.71	436	0.796	1732	-0.21	2610	-0.361	2677	-16.688	2416	1.388	2565	-7.434
2174	5.077	360	-1.566	439	0.712	1722	-2.287	2610	-0.254	2677	-17.035	2403	0.589	2497	-9.017
2174	1.788	373	-2.001	450	1.921	1616	0.967	2610	-0.894	2677	-17.929	2393	-0.66	2636	-5.891
2174	1.17	368	-3.243	430	1.777	1597	0.904	2610	-0.805	2677	-16.954	2428	-0.485	2636	-5.092
2174	2.589	366	-2.808	422	0.355	1619	1.274	2610	-0.805	2677	-15.624	2431	-0.333	2692	-5.298
2174	2.772	372	-3.247	438	1.022	1730	0.943	2610	-0.467	2677	-15.311	2423	0.633	2651	-7.473
2174	2.746	364	-0.417	433	0.967	1641	-0.638	2610	-1.197	2677	-13.026	2421	0.649	2707	-4.297
2174	3.388	351	-5.149	428	1.629	1750	3.696	2610	-1.392	2677	-17.024	2428	0.059	2719	-3.503
2174	0.828	353	1.146	442	2.082	1773	3.673	2610	-1.659	2677	-17.023	2437	-0.549	2738	-3.016
2174	2.332	352	-1.785	429	1.063	1732	-0.696	2610	-1.428	2677	-16.818	2498	2.14	2727	-4.757
2139	1.561	1055	2.532	427	-0.309	1738	3.589	2610	-1.214	2677	-17.629	2353	-0.332	2721	-4.558
2139	-3.914	348	-2.264	430	0.91	1725	-0.465	2610	-0.165	2677	-17.048	2370	-0.978	2723	-4.191
2139	-2.56	352	-2.454	429	-0.792	1735	0.499	2610	-0.734	2677	-18.255	2410	-0.219	2716	-5.315
2139	-2.224	374	0.257	426	0.856	1783	0.566	2610	-0.325	2677	-16.136	2536	3.345	2724	-4.734
2139	-3.599	360	-2.754	427	0.992	1723	-0.009	2610	-1.339	2677	-16.783	2483	3.138	2722	-4.929
2139	-2.45	120	3.544	433	2.642	1729	1.728	2610	-1.623	2677	-17.062	2524	4.252	2720	-4.374
2139	-2.52	139	8.05	428	-0.107	1720	-0.057	2610	-0.396	2677	-16.731	2514	1.46	2716	-5.753
2139	-2.456	137	-10.752	433	1.611	1727	-0.894	2610	0.138	2677	-16.105	2438	1.572	2720	-4.524
2139	-6.13	146	4.084	425	0.537	1742	0.213	2610	-1.588	2677	-17.623	2474	2.835	2726	-2.914
2139	-4.507	146	8.122	430	4.306	1719	-0.541	1980	3.819	2677	-16.945	2475	2.82	3300	-2.803
2139	-3.203	133	6.569	431	1.738	2565	-0.142	1980	3.555	420	12.613	2393	-0.396	3310	-2.596
2139	-11.019	143	4.264	434	3.458	2543	-1.629	1980	4.177	433	12.371	2379	0.977	3299	-2.097
2139	-2.633	138	-2.797	458	1.932	2560	-2.067	1980	0.72	431	11.301	2429	2.481	3300	-4.237
2139	-0.469	864	6.371	435	1.757	2542	0.468	1980	6.479	432	14.277	2441	2.356	3312	-0.976
2229	5.656	326	-15.173	420	0.66	2568	1.974	1980	-0.178	425	11.655	2433	0.245	3306	-6.373
2229	5.474	143	6.63	437	1.898	2553	4.022	1980	2.552	428	12.199	2518	3.051	3308	-2.07
2229	5.081	138	7.335	429	2.558	2553	3.648	1980	3.449	422	12.657	351	7.877	3302	-2.197
2229	5.088	131	4.238	434	0.331	2554	4.076	1980	5.828	427	12.736	354	5.802	3307	-4.293
2229	1.835	140	10.021	433	-1.321	2549	2.71	1980	6.574	429	14.234	351	6.2	3308	-2.32
2229	4.32	369	-2.97	433	1.688	2553	3.145	1980	3.871	424	13.059	357	7.504	3298	-1.895
2229	4.437	364	-3.958	437	4.506	2553	2.146	1980	2.211	428	11.174	362	6.237	3293	-1.919
2229	4.839	130	-6.515	431	3.19	2553	3.38	1980	9.85	438	11.834	350	6.201	3313	-1.767
2229	4.495	109	-5.542	441	1.613	2553	2.949	1980	4.589	425	13.353	356	4.804	3290	-3.09
2229	4.22	361	-3.12	517	0.758	2553	2.528	1980	3.981	432	12.874	359	8.283	3285	-1.885
2229	5.362	107	-5.622	452	3.144	2519	0.657	1980	1.363	427	13.049	358	6.86	3293	-1.705
2229	4.35	357	-3.61	467	7.091	2542	1.185	1980	7.01	429	11.812	353	5.41	3293	-4.661
2229	4.849	106	-6.451	435	-12.121	2527	0.922	1980	2.855	1022	1.674	349	5.504	3314	-3.458
2229	4.793	355	-0.92	493	-14.444	2519	1.975	1980	1.734	362	9.155	362	6.401	3303	-5.287
2229	4.611	325	-4.668	433	5.967	2533	2.459	1980	1.713	373	9.292	364	8.138	3314	-4.685
2229	6.12	346	-3.341	445	0.493	2548	2.932	1490	7.275	357	-7.432	357	7.143	3310	-2.173
2229	6.012	341	-5.581	436	-3.502	2533	2.852	1490	6.375	1777	0.191	360	6.137	3314	0.205
2229	5.373	364	-2.327	436	5.572	2527	2.866	1490	6.65	435	8.154	350	7.393	3305	-9.311
2229	5.535	344	-3.911	433	-0.186	2464	-8.184	1490	8.107	437	15.076	348	5.387	3305	-6.574
2229	5.025	367	-3.673	431	3.555	2464	-8.184	1490	4.615	435	14.418	350	7.933	3309	-2.464
2229	5.037	376	-3.383	441	4.359	2475	-10.413	1490	6.615	375	10.702	358	9.224	3306	-3.665
2229	5.795	357	-4.082	444	2.949	2468	-9.434	1490	6.295	362	-11.547	354	8.297	3298	-2.356
2229	5.115	129	-1.081	449	3.699	2477	-7.984	1490	8.379	368	10.832	360	7.604	3305	-4.373
2229	4.522	373	-2.323	444	4.703	2477	-7.984	1490	8.02	432	10.808	354	6.69	3303	-6.73
2229	4.457	114	-2.586	457	4.761	2461	-9.995	1490	6.69	443	14.523	353	7.669	3303	-2.636
2229	4.154	109	3.617	455	4.407	2457	-9.389	1490	5.642	376	7.224	358	6.139	3291	-1.773
2229	3.644	564	-16.794	444	3.066	2469	-8.355	1490	4.434	419	4.454	366	6.866	3287	-2.231
2229	4.807	113	-0.687	444	-1.571	2461	-8.69	1490	7.195	444	11.262	360	5.965	3303	-6.893
2229	5.048	116	-0.055	445	3.618	2481	-9.37	1490	4.984	424	10.852	356	10.186	3329	-1.291
2229	2.88	114	-7.461	441	0.804	2479	-10.971	1490	5.67	420	9.081	360	7.75	3309	-3.057
2125	5.301	536	-1.473	442	4.739	1715	-1.414	1490	8.537	1850	1.357	351	6.82	3305	-2.293
2125	7.722	353	1.74	447	4.099	1725	-1.559	1490	7.714	1940	-7.586	368	8.903	3291	-3.8
2125	3.779	115	0.005	443	3.906	1723	-1.88	1490	5.268	1996	6.857	355	7.998	3319	-6.251
2125	2.63	110	-0.272	457	2.162	1694	-2.149	1490	6.879	470	11.851	346	8.247	3304	0.089
2125	2.86	601	1.49	444	5.089	1702	-1.463	1490	8.006	566	13.287	365	8.205	3296	-4.145
2125	3.189	113	-2.466	443	5.548	1708	-1.947	1490	4.541	2725	0.881	357	4.262	3279	-6.132
2125	2.169	103	-3.641	444	3.936	1690	-2.968	1490	6.092	470	11.782	365	8.329	3273	-5.287
2125	3.013	114	-3.285	428	4.322	1689	-2.969	1490	5.43	425	12.419	351	5.732	3300	-0.599
2125	-0.248	118	-4.017	469	3.184	1707	-1.695	1490	6.849	1295	7.877	357	5.421	3314	-1.126
2125	2.274	119	-3.884	444	6.963	1699	-4.848	1490	8.002	376	7.968	353	6.509	3295	-6.227
2125	3.222	113	-3.294	431	4.255	1692	-7.169	1490	7.48	1080	2.151	354	7.386	3301	-6.242
2125	3.962	116	-2.276	439	1.79	1731	-3.796	1490	7.18	2002	-7.896	345	10.618	3287	-2.22
2125	3.713	107	3.627	442	5.193	1690	-5.853	1490	7.179	440	13.139	358	9.741	3297	-1.303
2125	3.909	116	-1.471	275	-0.409	1671	-6.629	1490	10.599	371	4.916	351	6.448	3315	-2.843
2125	3.086	120	1.889	444	4.034	1686	-4.995	1490	7.608	414	6.575	350	4.211	3292	-3.292
2125	4.185	113	-3.288	428	3.998	1680	-5.348	1490	6.397	351	-0.355	356	4.667	3330	-2.244
2125	2.904	123	1.345	401	4.27	1699	-3.515	1490	5.001	427	11.403	356	6.331	3313	-4.184
2125	1.949	115	-3.449	430	4.506	3258	-0.024	1490	7.262	356	-13.512	347	4.547	3319	-3.572
2125	2.418	105	-2.525	444	4.037	3247	1.359	1490	6.508	354	-13.934	370	7.591	3293	-3.054
2125	2.418	119	-2.176	431	3.361	3247	-0.77	1490	6.702	364	3.704	463	12.966	3286	-2.513
2125	3.055	105	4.946	438	5.721	3233	-0.221	1490	5.907	368	5.857	345	5.802	3328	-4.319
2125	3.472	114	-3.242	225	-5.652	3245	0.956	1490	4.952	3554	-4.644	351	10.598	3284	-4.623
2125	3.79	105	-2.927	278	-5.923	3265	0.215	1490	6.273	3567	-3.374	344	11.549	3302	-5.43
2173	2.538	116	-2.691	301	-17.507	3248	0.411	1935	0.622	3560	-3.237	353	11.835	3280	-7.01
2173	3.564	116	-3.002	309	-7.425	3252	3.459	1935	1.072	3569	-1.748	349	11.477	3316	-1.107
2173	5.045	114	-12.528	316	-10.593	3245	3.183	1525	-4.699	3575	-2.633	349	5.605	3313	-1.599
2173	3.2	365	-0.447	389	-23.741	3266	0.263	1525	-4.424	3546	-5.068	346	12.838	3288	-3.73
2173	1.193	129	-5.362	350	-15.314	3255	0.288	1525	-2.97	3588	-5.923	339	5.14	3289	-5.242
2173	2.99	1011	10.845	244	-4.918	3234	-0.962	1770	3.329	3597	-6.239	345	5.432	3316	-4.575
2173	3.522	112	-5.337	238	-3.524	3254	0.55	1525	1	3527	-5.021	340	8.806	3302	-3.324
2173	3.022	715	0.658	303	-11.301	3258	0.624	1525	4.454	3558	-4.759	346	9.213	3292	-2.72
2173	2.401	100	-4.913	240	-2.611	1792	-13.707	1490	4.359	3690	-6.963	343	13.117	3306	-3.289
2093	4.337	115	0.49	307	-19.255	1741	-13.822	1525	-0.896	3548	-3.35	341	10.229	3297	-1.268
2093	4.157	105	-7.206	253	-0.518	1734	-13.492	1770	3.703	3565	-7.484	432	14.883	3297	-5.19
2093	4.761	837	2.928	296	-15.587	1740	-14.768	1770	-0.735	3512	-7.748	1140	8.524	3295	-5.381
2093	4.65	100	-3.575	243	-0.806	1731	-13.397	1490	1.47	3537	-3.907	1140	6.846	2169	-2.247
2093	4.614	360	0.606	240	-9.719	1732	-12.923	1590	2.812	3510	-3.791	1140	6.602	2198	4.95
2093	3.265	116	-3.102	248	-11.688	1738	-20.681	2010	-1.228	3544	-3.594	1140	6.147	2227	-1.629
2093	3.787	115	-3.746	244	-12.395	1713	-17.68	1770	-0.779	3557	-2.89	1140	7.907	2145	0.294
2093	4.207	116	-2.125	248	-13.213	1784	-11.707	1490	-7.224	3580	-4.956	1140	7.323	2156	1.19
2093	3.801	363	-1.166	2613	4.235	1745	-15.082	1810	-2.416	3500	-4.753	1140	6.353	2165	-1.524
2092	5.352	103	-5.318	245	-8.478	1716	-12.492	1490	-0.644	3526	-5.526	1140	7.957	2194	-3.433
2092	3.594	106	-2.385	255	-11.566	2946	0.224	2520	0.458	3475	-6.401	1140	7.013	2200	5.046
2092	4.808	360	-1.113	254	-12.543	2496	3.564	2520	-1.527	3788	-3.364	1140	9.087	2083	-0.537
2092	3.721	101	-2.264	247	-9.71	3168	1.048	1790	3.667	3483	-6.044	1140	10.128	2079	0.732
2092	4.201	361	-1.444	253	-10.539	2517	-15.039	1790	3.326	3548	-4.108	1140	5.992	2100	0.065
2092	3.057	104	-3.711	245	-14.694	2514	-10.406	1790	3.923	3537	-4.679	1140	9.113	2101	1.528
2092	4.093	103	-2.718	252	-11.594	2514	-11.586	1790	2.147	3547	-4.522	1140	6.771	2065	0.473
2918	-0.226	101	0.489	249	-11.778	3178	-1.832	1790	3.802	3382	-7.228	1140	9.92	2097	-0.939
2918	-0.703	103	-2.484	262	-7.784	1746	-11.498	1790	2.673	3425	-7.274	1140	7.781	2074	-2.074
2918	0.01	355	-1.673	223	-1.785	1753	-16.085	1790	2.901	3501	-5.058	1140	8.996	2079	-3.429
2918	0.005	104	-5.918	226	-3.689	1727	-13.239	1790	2.702	3794.4	-0.975	1140	8.884	2169	-1.389
2918	0.023	101	-7.418	227	-7.982	1737	-13.532	1790	3.944	3867.8	-1.099	1050	3.541	2082	-6.564
2918	1.132	101	-7.649	240	-2.219	1733	-12.419	1790	1.26	3857.1	-0.85	1050	2.476	2160	-5.902
2918	0.772	102	-6.702	234	-5.221	1726	-12.348	1790	3.802	3864	-0.761	1050	1.334	2167	-1.983
2918	-1.18	102	-8.226	233	-2.955	1742	-10.807	1790	1.807	3792.6	-0.954	1050	4.92	2120	-5.122
2918	0.489	106	-6.759	233	-4.608	1756	-18.314	203	-1.85	3832.3	0.759	1050	1.18	2177	-4.823
2918	0.669	102	-7.441	238	-1.213	1761	-16.734	198	1.791	3635.8	-1.266	1050	0.22	2162	2.031
2918	-1.005	102	-7.579	2500	3.841	2720	-0.726	200	-1.44	3775.6	-0.912	1050	1.653	2126	-6.059
2918	-0.04	104	-8.855	241	-12.621	2930	0.636	206	-2.267	3654.5	-2.961	1050	3.448	2112	1.942
2918	2.103	106	-7.708	249	-12.073	3302	2.28	200	-1.937	3896.6	0.429	1050	2.99	2132	-4.338
2918	-0.152	104	-4.771	240	-10.528	3235	-1.521	206	0.19	3794.9	-1.062	1050	4.277	2093	3.101
2918	-0.417	104	-5.545	245	-12.727	2503	-14.055	195	-3.009	3893.2	-0.317	1000	5.232	2116	3.22
2918	-0.521	98	-7.292	244	-11.685	1600	-2.255	565	-12.244	3823.3	-2.036	1000	5.209	2100	1.111
2918	0.189	466	-11.939	249	-11.456	1598	-3.187	206	-0.723	3788.7	-2.43	1000	9.178	2117	1.541
2918	-0.143	102	-3.811	250	-9.797	1591	-4.194	2615	1.971	3822.5	-2.928	1000	5.297	2096	0.943
2918	0.359	99	-2.819	245	-10.837	1599	-1.744	209	-0.611	3835.5	-2.028	1000	5.762	2098	1.878
2868	-3.305	103	-2.818	250	-11.751	1561	-3.826	1034	9.953	3756.2	-2.617	1000	5.857	2134	3.845
2868	-2.826	101	-0.55	244	-11.518	1607	-2.031	206	-0.154	3865.2	-0.743	1000	3.549	2087	3.707
2868	-3.113	104	-4.176	245	-11.916	1579	-3.11	626	8.926	3800.3	-2.268	1000	4.418	2140	2.909
2868	-6.002	102	-3.778	250	-11.312	1592	-2.576	211	-0.462	3630.6	-2.914	1000	6.588	2117	3.232
2868	-3.919	100	-2.858	242	-13.204	1594	-2.389	1795	0.253	3478.5	-7.254	1030	3.815	2133	2.055
2868	-2.933	102	-3.069	255	-10.359	1571	-2.897	208	0.103	3580.5	-7.15	1030	4.542	2033	1.662
2868	-3.563	100	-1.537	245	-11.837	1603	-3.746	566	4.641	3765.6	-2.943	1030	4.172	2195	0.357
2868	-3.297	101	-2.089	224	-5.283	1563	-3.503	205	0.728	3601.7	-4.296	1030	4.128	1999	-2.468
2868	-3.34	102	-2.876	228	-6.408	1591	-2.488	203	1.319	3887.9	0.009	1030	2.514	2123	3.14
2868	-4.994	101	-2.444	231	-4.979	1576	-4.95	214	1.17	3780.5	-2.757	1030	3.757	2225	6.407
2868	-2.71	373	-2.549	232	-4.797	1585	-3.51	205	-0.977	3675.5	-1.38	1030	4.432	2124	0.629
2868	-3.862	102	-3.368	224	-7	1567	-3.271	931	9.394	3581.4	-3.734	1030	4.721	2162	2.188
2868	-3.977	100	-4.23	227	-4.391	1614	-0.791	205	-2.619	3623.8	-1.422	1030	5.523	2137	-1.557
2868	-3.809	350	-0.193	230	-6.271	1600	-1.579	396	10.081	3640.9	-2.913	1030	4.297	2113	0.754
2868	-1.819	103	-4.485	226	-7.574	1619	1.149	213	-0.407	3380.7	-8.401	960	4.987	2132	-0.231
2868	-4.353	101	-5.258	223	-7.189	1600	-0.939	209	-1.901	3677.6	-0.621	960	4.539	2000	-3.043
2868	-4.18	100	-4.973	225	-4.975	1604	-0.003	215	0.672	3654.8	-2.239	960	5.085	1526	-1.567
2868	-4.159	100	-3.598	230	-6.266	1575	-1.426	222	1.474	3699.2	-1.001	960	5.342	1526	-2.203
2868	-5.345	103	-4.626	230	-5.714	1604	0.215	220	-1.81	3659.2	-2.455	960	5.079	1526	-2.165
2868	-3.508	100	-4.76	232	-4.83	1616	-0.338	217	-0.119	3647.3	-1.937	960	5.06	1526	-4.064
2868	-3.102	100	-4.096	232	-5.676	1596	-1.843	213	-0.574	3620.6	-1.026	960	4.387	1526	-4.17
2868	-2.457	100	-5.112	228	-4.886	1606	-0.061	215	2.571	3678.1	-1.816	960	5.058	1526	-1.305
2868	-3.548	103	-5.141	2526	6.625	1588	-0.284	217	-0.826	3637	-2.696	960	5.052	1526	-2.993
2868	-2.493	336	-2.594	2522	7.112	1603	-0.307	220	-2.731	3616.6	-0.919	960	5.463	1526	-4.236
2868	-2.533	119	-6.63	2486	5.437	1607	-0.962	225	-1.834	3709.8	-0.698	1000	-4.387	1526	-0.77
2862	0.964	102	-3.779	2450	7.948	1596	-1.245	221	-1.047	3694.2	-1.739	1000	-4.36	1526	-2.793
2862	2.667	99	-0.479	2530	7.873	1597	-0.866	216	-1.641	3716.3	-0.797	1000	-1.143	1526	-2.572
2862	1.792	105	-0.773	2530	6.582	1573	-0.155	222	2.01	3593.9	-3.25	1000	-1.836	1526	-2.308
2862	1.207	98	-1.764	2530	7.4	1593	-1.237	213	-1.497	3695.8	-1.743	1000	-4.27	1526	-1.505
2862	1.28	344	-2.576	2500	7.9	1645	-0.786	227	-2.116	3320	-10.02	1000	-1.191	1526	-1.274
2862	3.164	95	-0.965	2194	5.669	1583	-0.608	222	-0.346	3704.8	-1.333	1000	-0.5	1526	1.29
2862	2.252	105	-0.21	2556	5.657	1591	-0.75	223	-0.336	3688.6	-2.006	1000	-1.089	1526	-2.366
2862	4.885	100	-0.826	2507	7.56	1613	0.022	277	10.224	3706.6	-0.74	1000	2.264	1526	-2.053
2862	2.786	101	-2.088	2555	5.272	1574	-0.951	311	4.604	3640.2	-2.222	1000	-0.661	1526	-1.895
2862	2.923	103	4.253	1823	-0.275	1572	-1.279	382	14.338	3689.2	-1.056	1040	4.671	1526	-3.6
2862	3.327	349	-0.854	2459	8.26	1573	-2.179	505	12.795	3707.5	-1.497	1040	5.81	1526	-0.865
2862	2.143	603	5.085	2555	7.188	1586	-0.932	2668	-1.963	3694.1	-1.564	1040	5.452	1526	-2.261
2862	0.233	103	2.907	1792	-0.859	1608	-4.597	2757	1.179	3794.6	-0.733	1040	5.158	1526	-2.538
2862	3.781	107	-1.16	2157	-0.215	1587	-5.701	2757	0.528	3801.5	-0.116	1040	5.423	1526	-1.729
2862	1.847	101	-8.113	2119	-0.597	1619	-6.125	2902	-0.061	3762.8	-1.481	1040	4.537	1526	-2.788
2862	4.979	106	-13.833	2122	-0.118	1604	-4.257	2662	2.32	3795.1	-1.209	1040	5.232	1526	-3.049
2862	0.227	108	-5.323	2112	0.442	1577	-4.859	2779	4.186	3770.8	-0.554	1040	4.298	1526	-2.34
2862	3.437	340	-1.896	2134	-0.869	1635	-4.704	2848	3.297	3799.5	-1.438	1040	6.071	1526	-3.082
2862	2.164	107	-15.691	2140	0.408	1593	-4.438	2757	-1.056	3789.6	-1.077	1040	5.179	1526	-2.071
2822	-0.471	95	-5.029	2190	1.693	1590	-4.503	585	-25.136	3800.1	-0.574	1347	2.015	1526	-4.142
2822	-0.485	344	-0.946	2147	0.045	1546	-5.573	1874.1	0.847	3751.1	-1.767	1347	2.485	1526	-3.218
2822	-0.68	97	-4.17	2115	-0.398	1641	-3.434	1874.1	-9.487	3785.5	-0.514	1347	2.224	1526	-2.17
2822	-0.291	95	-5.33	2137	0.006	1595	-6.976	1874.1	1.394	3795	-0.615	1347	2.599	1526	-0.916
2822	-0.106	100	-1.475	2144	1.042	1592	-5.84	1874.1	-5.218	3794.6	-0.517	1347	2.051	1526	-4.609
2822	-0.637	97	-6.325	2165	1.583	1597	-4.094	1874.1	2.426	3781.9	-1.323	1347	2.323	1526	-3.178
2822	-0.452	208.4	-4.135	2087	-0.003	1643	-4.112	1874.1	-3.888	3788.5	-0.855	1347	2.36	1526	-3.024
2822	-0.259	208.4	-4.037	2136	0.456	1565	-6.403	1874.1	1.752	3790.7	-0.245	1347	2.612	1526	-3.048
2822	-1.439	208.4	-3.521	2082	-1.648	1617	-4.111	1874.1	1.108	3786.9	-1.325	1347	4.191	1526	-3.661
2822	-0.124	208.4	-3.581	2144	0.497	1547	-5.52	1874.1	1.063	3772.2	-1.121	1347	2.124	1527	-2.876
2822	-0.913	208.4	-3.532	2137	0.256	1577	-5.318	1874.1	2.091	3801	-1.059	1347	3.301	1527	-4.143
2822	0.139	208.4	-5.507	2135	0.048	1594	-4.553	1874.1	-1.685	3725.7	-1.618	1347	3.465	1527	-2.016
2822	-0.742	208.4	-3.844	2136	0.243	1595	-5.7	1874.1	-8.918	3785.9	-0.714	1281	2.625	1527	-2.662
2822	-0.422	208.4	-3.568	2108	0.625	2475	-0.808	1874.1	-4.731	3789	-0.546	1281	1.553	1527	-2.587
2822	-0.296	208.4	-3.687	2165	1.68	2486	-1.574	1874.1	3.363	3647.8	-4.611	1281	0.517	1527	-3.642
2822	0.076	208.4	-5.181	2162	1.687	2484	-1.476	1874.1	-1.959	3759.1	-1.349	1281	1.725	1527	-2.882
607	-5.425	208.4	-3.563	2141	0.412	2479	0.368	1874.1	-5.246	3780.5	-1.26	1281	0.562	1527	-4.444
607	-6.189	208.4	-5.573	2139	1.43	2485	-0.672	1874.1	4.828	3784.9	-1.252	1281	2.036	1527	-5.15
607	-5.268	208.4	-3.605	2124	0.493	2479	-0.428	1874.1	2.339	3793.9	-0.625	1281	0.998	1527	-2.363
607	-5.347	208.4	-4.577	2137	0.246	2472	-2.097	1874.1	7.347	3778.6	-1.302	1281	0.536	1527	-1.638
607	-5.238	208.4	-4.018	2137	-0.281	2856	3.56	1874.1	1.591	3757.7	-1.807	1281	0.26	1527	-2.14
607	-5.705	208.4	-9.879	2137	0.88	2983	-1.198	1874.1	1.033	3757.7	-2.588	1281	2.085	1527	-2.763
607	-6.702	208.4	-4.021	790	-15.894	2680	-2.739	1874.1	2.254	3781.1	-2.65	1281	0.833	1527	-2.99
607	-6.796	208.4	-4.303	790	-16.566	2784	-1.023	1874.1	6.239	3781.8	-1.84	1281	2.025	1527	-3.351
607	-4.431	208.4	-5.057	790	-16.091	2607	5.124	1874.1	2.701	3773.6	-1.237	1268	6.612	1527	-2.809
607	-4.449	208.4	-3.43	790	-15.425	2567	-0.725	1884.1	2.715	3653.2	-4.939	1268	8.568	1527	-3.904
607	-3.654	276.3	0.304	790	-16.333	2515	2.483	1884.1	-4.522	3781	-1.702	1268	6.975	1519	-1.937
607	-5.966	276.3	0.801	790	-15.788	2497	6.618	1884.1	-5.591	3711.7	-1.763	1268	6.416	1519	-2.72
607	-6.516	276.3	0.517	790	-16.256	2510	4.341	1884.1	-6.604	3790.8	-0.676	1268	7.514	1519	-3.093
607	-4.847	276.3	-0.012	790	-15.38	2483	2.501	1884.1	-3.234	3743.4	-1.071	1268	4.033	1519	-1.449
2674	-3.413	276.3	1.307	227	-14.376	2529	3.13	1884.1	-4.582	3710.9	-1.911	1268	4.488	1519	-3.238
2674	-2.211	276.3	-0.006	227	-14.621	2504	2.528	1884.1	3.994	3762.7	-0.595	1268	5.544	1519	-0.205
2674	-1.794	276.3	0.756	227	-15.051	2489	2.486	1880.5	-7.243	3765.9	-1.529	1268	6.239	1519	-1.943
2674	-3.786	276.3	1.605	227	-14.078	2508	2.673	1880.5	-7.491	3772.7	-0.266	1268	4.763	1519	-3.049
2674	-2.096	276.3	3.107	227	-14.664	2504	4.974	1880.5	-6.096	3794.9	0.532	1268	7.326	1519	-0.632
2674	-3.231	276.3	1.173	227	-14.241	2519	1.471	1880.5	-7.394	3748.3	-1.873	1268	6.405	1519	-2.668
2976	1.75	276.3	1.393	227	-13.425	2519	4.183	1880.5	-6.656	3786.2	-0.619	1268	6.791	1519	-0.633
1929	-4.009	276.3	1.089	227	-14.134	2455	0.226	1880.5	-11.397	3733.7	-2.518	1268	5.974	990	-6.752
1929	-2.623	276.3	0.646	227	-14.073	2460	-0.374	1880.5	-9.019	3696.4	-2.512	1275	8.985	845	-8.322
1929	-2.832	276.3	0.222	227	-14.37	2478	-4.044	1880.5	-9.222	3796.7	-1.431	1275	6.367	913	-6.003
1929	-3.162	276.3	1.953	227	-14.576	2473	-0.591	1880.5	-9.476	3794.8	-0.747	1275	9.059	926	-6.884
1929	-2.039	276.3	0.929	227	-14.367	2715	3.368	1880.5	-8.737	3752	-2.52	1275	6.257	814	-8.86
1929	-2.732	276.3	0.131	227	-14.252	2512	2.551	1880.5	-6.341	3745.5	-1.913	1275	7.74	911	-8.846
1929	-2.95	276.3	0.841	227	-13.736	2504	1.438	1880.5	-6.868	3780.6	-0.897	1275	11.018	868	-5.898
1929	-2.669	276.3	0.536	210	-14.963	2508	2.354	1880.5	-7.101	3774.3	-2.038	1275	8.85	901	-11.286
1929	-2.856	276.3	0.4	210	-14.76	2514	1.558	1880.5	-5.658	3745.3	-2.62	1275	7.64	990	-3.036
1929	-3.976	99.6	7.307	210	-14.421	2509	1.673	1880.5	-7.705	3792.3	-1.683	1275	7.75	845	-10.329
1929	-3.215	99.6	6.724	210	-14.812	2504	1.873	1880.1	-9.194	3730.9	-2.022	1275	7.411	885	-6.315
1929	-3.228	99.6	8.189	210	-13.706	2500	1.691	1880.1	-4.529	3779.7	-1.723	1275	7.039	943	-4.579
1929	-3.547	99.6	8.546	210	-14.538	2503	0.613	1880.1	-6.892	3772.6	-1.749	1275	6.705	902	-5.719
1929	-3.891	99.6	7.888	210	-14.894	2511	-0.239	1880.1	-6.605	3787	-1.465	2554	0.675	918	-6.033
1929	-4.08	99.6	7.87	210	-14.302	2506	2.494	1880.1	-6.087	3787	-1.161	2554	2.706	952	-5.453
1929	-3.681	99.6	3.428	210	-14.84	2510	0.429	1880.1	-7.982	3787	-0.809	2554	2.646	938	-6.967
1896	-4.77	99.6	7.658	227	-14.21	2509	1.217	1880.1	-2.721	3787	-1.179	2554	-0.941	902	-10.087
1896	-3.473	99.6	11.004	227	-14.393	2608	1.768	1880.1	-1.973	3787	-1.153	2554	-1.834	513	-2.173
1896	-3.819	99.6	8.516	227	-13.72	2470	-0.265	1880.1	-8.132	3787	-1.055	2554	-6.242	527	-0.855
1896	-4.575	99.6	5.986	227	-14.131	2464	-2.437	1880.1	-8.388	3787	-1.109	2554	0.383	529	0.831
1896	-3.739	99.6	6.305	227	-13.848	2460	-2.028	1880.6	-6.865	3787	-1.611	2554	0.624	616	1.58
1896	-3.108	99.6	9.693	227	-14.195	2467	-2.751	1880.6	-8.959	3787	-0.967	2554	1.756	654	1.594
1896	-3.591	99.6	8.322	227	-14.131	2479	-2.655	1880.6	-5.983	3787	-1.159	2554	-1.066	703	-1.487
1896	-4.683	99.6	6.907	227	-14.141	2467	-1.481	1880.6	-5.951	3787	-1.719	2568	6.686	1035	7.361
1896	-5.098	99.6	6.254	227	-13.975	2475	-2.793	1880.6	-6.69	3787	-1.302	2568	4.107	1056	6.247
1896	-3.716	99.6	6.95	227	-14.121	2471	-2.153	1880.6	-7.962	3787	-0.34	2568	4.94	495	2.511
1896	-4.039	99.6	6.458	227	-14.958	2513	-2.171	1880.6	-7.484	3787	-1.143	2568	4.351	518	-2.072
1896	-4.433	99.6	5.127	211	-14.509	2541	4.719	1880.6	-8.589	3534.8	-5.455	2568	3.456	519	-9.09
1896	-4.272	99.6	5.576	211	-14.486	2533	3.485	1880.6	-7.64	3391.1	-9.136	2568	5.63	521	-3.635
1896	-5.039	145	4.228	211	-14.317	2533	3.09	1880.6	0.211	3689	-1.029	2568	3.423	533	-0.697
1896	-3.928	145	4.567	211	-14.04	2521	1.816	1880.6	-6.543	3692.6	-0.987	2568	3.167	536	9.502
1896	-4.1	145	4.161	211	-14.493	2532	2.712	1880.6	-5.977	3626.5	-2.805	2568	3.368	570	1.951
1896	-4.183	145	4.349	211	-14.09	2665	5.449	1880.6	-5.724	3671.2	-0.764	2568	3.564	1115	4.281
1859	-5.573	145	4.453	211	-14.656	2523	3.701	1880.6	-3.16	3694.9	-1.99	2552	-12.753	484	-1.726
1859	-6.337	145	2.212	211	-14.71	2518	2.622	1880.6	-7.451	3250	1.156	2552	0.532	490	2.477
1859	-6.31	145	3.007	211	-14.765	2552	3.421	1874.2	-13.231	2796.7	-8.299	2552	1.036	491	-0.654
1859	-5.704	145	4.068	211	-13.892	2519	2.751	1874.2	-14.311	3254.4	0.454	2552	-9.446	517	-1.424
1859	-4.773	145	4.482	211	-14.518	2519	3.669	1874.2	-6.344	3258.1	-0.002	2552	-12.318	528	0.075
1859	-5.166	145	3.576	211	-13.958	2702	3.833	1874.2	-7.757	3038.9	-4.266	2552	-10.098	538	-3.389
1859	-6.374	145	3.459	211	-14.012	2004	-3.41	1874.2	-9.415	3174.6	-1.18	2552	-8.242	654	4.661
1859	-5.479	145	3.967	211	-14.982	2034	-2.419	1874.2	-15.102	3245.1	1.582	2552	-0.092	172	-7.404
1859	-4.799	145	3.411	212	-13.645	2016	-4.604	1874.2	-9.539	3252.3	0.928	2552	-12.959	168	-8.085
1859	-4.048	145	4.585	212	-14.511	2004	-4.738	1874.2	-9.503	3243.8	0.218	2552	-12.608	174	-7.282
1859	-5.415	145	5.564	212	-14.569	2026	-3.207	1874.2	-7.526	2779	-9.045	2552	-12.858	168	-8.841
1859	-5.095	145	4.133	212	-13.733	2005	-2.784	1874.2	-8.161	3262.6	0.789	2552	-10.397	169	-6.504
1859	-4.983	145	5.741	212	-13.883	2019	-2.624	1874.2	-7.955	2769.2	-9.572	538	-1.866	164	-8.515
1859	-5.655	145	1.824	212	-14.215	2068	-2.976	1874.2	-7.876	3164.2	-1.436	541	0.938	165	-6.148
1859	-5.369	145	2.433	212	-14.159	2020	-2.893	1874.2	-11.823	2771.1	-8.817	536	-1.342	160	1.082
1859	-5.071	145	4.524	212	-14.072	2090	-1.589	1876.2	0.722	3232	-0.088	538	-3.794	160	0.565
2635	-2.397	102.7	5.612	212	-14.196	2030	-3.33	1876.2	0.765	3252.7	0.411	907	1.639	178	-1.145
2635	-2.003	102.7	7.007	212	-14.671	2037	-3.533	1876.2	1.531	2830.6	-8.209	537	1.063	156	2.517
2635	-1.219	102.7	2.997	212	-14.71	2010	-2.778	1876.2	0.527	3261.3	1	541	3.101	165	0.131
2635	-2.088	102.7	3.894	212	-13.941	2019	-3.424	1876.2	1.138	3269.1	1.596	916	-0.333	172	-9.402
2635	-0.968	102.7	5.306	212	-14.405	2023	-4.345	1876.2	0.577	3131	-2.661	565	1.204	173	-6.48
2635	-2.741	102.7	4.257	212	-15.125	2004	-3.636	1876.2	1.567	2779	-9.008	536	2.333	174	1.833
2635	-2.513	102.7	2.965	201	-17.438	1983	-2.368	1876.2	-1.616	3242.2	0.349	541	1.941	174	-3.934
2612	-1.541	102.7	3.457	201	-17.128	2006	-3.42	1876.2	-12.564	3041.6	-4.607	2543	0.687	176	-6.215
2612	-0.794	102.7	4.228	201	-17.841	2009	-4.157	1876.2	-9.197	3241.7	0.597	2515	1.483	176	-8.03
2612	-0.498	102.7	2.714	201	-16.989	2028	-2.031	1876.2	-32.588	3278.6	0.557	2526	0.675	176	-10.852
2612	-0.933	102.7	4.613	201	-17.325	2000	-3.954	1876.2	1.455	3022.2	-4.993	2529	-0.485	177	-7.615
2612	-0.381	102.7	4.944	201	-17.459	1997	-3.36	1881.7	-3.023	2845.9	-5.031	2503	0.216	178	-6.467
2612	-0.647	102.7	4.331	201	-17.281	2024	-3.561	1881.7	-7.067	3177.8	-1.576	2560	1.874	178	-1.855
2612	-1.547	102.7	4.797	201	-16.021	2015	-3.815	1881.7	-5.858	3058.8	-3.819	2554	2.29	179	-6.886
1919	-0.757	102.7	3.415	201	-16.988	2440	-1.796	1881.7	-7.243	2837.3	-5.998	2578	1.125	179	-6.983
1919	-0.28	102.7	3.634	201	-15.472	2440	-1.239	1881.7	-6.747	2847.1	-4.952	2543	1.061	185	-7.904
1919	-0.655	102.7	3.456	201	-17.265	2440	-1.806	1881.7	-8.555	2851	-5.667	2515	-0.486	187	-5.437
1919	-0.769	102.7	4.724	201	-16.779	2440	-5.517	1881.7	-7.06	3256	0.761	832	-15.565	188	-2.977
1919	-0.425	102.7	4.113	201	-17.39	2440	-1.736	1881.7	-6.414	3028.9	-0.776	799	-15.963	192	-7.227
1919	-1.558	102.7	3.162	201	-17.35	2440	-1.25	1881.7	-6.442	3243	1.764	831	-14.734	194	-7.076
2760	0.913	149.5	2.752	1318	-41.775	2440	-0.967	1881.7	-7.357	3265.4	1.209	834	-15.926	200	-9.162
1919	-0.404	149.5	6.465	1318	-6.453	2440	-3.594	1881.7	-7.658	3248.6	0.861	828	-16.614	470	-3.391
2732	0.682	149.5	5.949	1318	-6.877	2440	-0.707	1881.7	-6.235	3018.5	-1.762	842	-15.117	500	-5.293
2732	1.026	149.5	3.381	1318	-5.797	2440	-2.056	1881.7	-8.864	3228	0.933	829	-16.358	477	-3.592
2732	0.501	149.5	5.539	1318	-5.656	2440	-2.069	1877.1	-0.427	3219.2	0.369	852	-15.223	460	-5.536
2732	1.151	149.5	6.891	1318	-6.102	2440	-2.91	1877.1	-0.178	3267.6	0.996	820	-15.965	494	-3.631
2732	0.013	149.5	3.572	1318	-4.851	2440	-2.022	1877.1	0.868	2977.7	-2.457	2729	5.866	485	-3.383
2732	-0.463	149.5	4.635	1318	-3.839	2440	-2.389	1877.1	2.262	3042.2	0.125	2768	3.36	454	-3.292
2732	0.518	149.5	4.437	1318	-11.075	2440	-1.915	1877.1	0.751	3026.1	0.498	2711	1.593	464	-4.269
2732	1.366	149.5	6.104	1318	-8.245	1528	-7.316	1877.1	-3.66	3039.5	0.734	2772	2.507	457	-3.514
2732	0.75	149.5	6.947	1318	-4.656	1530	-7.319	1877.1	-4.658	2982.4	-0.971	2715	0.527	469	-2.131
2732	0.544	149.5	6.493	1318	-7.698	2498	-13.125	1877.1	-1.023	3049.3	1.095	2796	4.01	479	-0.821
2693	-1.052	149.5	5.12	1318	-4.206	2513	-12.541	1877.1	-1.762	3052.5	1.079	2609	3.143	480	-0.238
2693	-1.739	149.5	5.44	1318	-4.586	2494	-13.856	1877.1	0.704	2978.7	-1.758	2656	4.851	484	-0.057
2693	-0.89	149.5	5.63	1318	-4.011	2506	-12.267	1877.1	0.808	3006.9	-0.161	2798	2.998	475	-1.807
2693	0.88	149.5	3.803	237	-3.308	2496	-12.984	1877.1	-0.399	3043.5	0.991	2780	2.033	467	-4.958
2693	-0.479	149.5	4.667	1330	-7.342	2501	-12.772	1877.1	1.573	2964.5	-1.478	2628	3.525	471	-1.806
2693	-0.619	149.5	5.748	401	-15.624	2521	-13.286	1877.1	1.964	3012.4	0.14	2642	3.854	495	-2.002
2693	-0.253	149.5	4.416	219	-7.649	2502	-14.875	1877.1	2.849	3022.2	-2.892	2532	-9.579	468	-2.769
2693	-0.376	149.5	4.651	449	-5.587	2503	-13.125	1877.1	2.018	3018.6	-2.854	2815	-4.881	461	-4.607
2727	-2.236	283	4.604	376	4.56	2516	-13.483	1877.1	-1.056	3011.2	-3.309	2517	-9.805	498	-2.769
2727	-1.773	283	3.95	222	-5.279	2488	-5.884	1852.3	0.599	2974.5	-2.934	2514	-6.372	447	-4.798
2727	-2.419	283	3.633	236	-5.366	2514	-12.077	1863.4	1.855	2942.3	-3.828	2485	-4.83	463	-7.313
2727	-0.98	283	2.46	223	-6.155	2519	-11.508	1877	-1.621	3028.9	-3.98	2635	-8.531	456	-8.01
2727	-2.555	283	2.848	243	3.686	2512	-14.129	1860.9	-5.523	2904.6	-4.544	2712	-5.62	503	-0.549
2727	0.093	283	3.562	2469	1.984	2506	-11.782	1876.5	2.305	3036.7	-4.833	2916	-3.318	482	-2.954
2670	-1.917	283	3.165	247	-4.004	2488	-5.884	1869.2	-4.836	3039.1	-3.772	2526	-12.326	468	-4.143
2670	-1.024	283	3.247	1869	-2.01	2514	-12.077	1850.9	-9.408	3042.5	-4.858	2835	-5.975	474	-4.193
2670	-1.922	283	5.394	122	-0.088	1586	-7.855	1871.7	-2.008	3019.1	-3.321	2800	-4.382	464	-2.746
2670	-0.818	283	2.535	439	2.766	1586	0.77	1883.5	3.573	2963	-1.695	2543	-6.081	475	-4.793
2670	-1.377	283	3.752	1800	-3.05	1589	6.189	1885.7	2.75	2928.1	-2.682	2528	-4.958	443	-8.371
2670	-1.89	283	4.712	223	-8.627	1586	1.41	1881.5	-5.649	2975	-2.15	2727	-6.494	566.1	-18.452
2673	-1.703	283	3.797	230	-8.404	1597	3.46	1889.3	-4.468	2969.6	-1.908	570	-18.112	566.1	-17.217
2673	-0.722	283	2.061	213	-10.004	1563	1.614	1883.3	-6.622	2851.2	-4.414	555	-18.139	566.1	-15.708
2673	-1.558	283	2.749	197	-9.419	1584	2.075	1889.5	-7.048	2938	-2.888	544	-17.461	566.1	-17.52
2673	-1.59	283	1.733	217	-10.732	2797	2.446	1891.4	-7.251	2998.6	-1.07	569	-17.053	566.1	-18.061
2673	-0.094	283	5.374	227	-8.955	2792	3.7	1875.6	-6.204	2911.5	-2.645	562	-18.164	70	14.296
2673	-1.911	283	3.346	209	-10.695	2789	1.803	1877.1	-7.468	2968	-1.704	552	-17.743	70	14.832
2673	-0.324	283	2.597	225	-9.369	2791	3.611	1878.9	-6.691	2907.3	-2.893	559	-17.068	70	13.663
2673	-2.002	283	2.67	228	-10.016	2779	2.917	1883.3	-11.334	2953.8	-1.913	557	-16.995	70	15.211
2700	0.24	248	11.815	220	-9.839	2774	1.84	1871	-9.43	2971.6	-2.477	552	-19.232	70	14.003
2700	-0.95	248	11.726	226	-10.647	2791	3.303	1871.7	-9.665	2853.9	1.156	568	-17.861	70	14.274
2700	-0.708	248	11.496	227	-9.323	2785	2.072	1840.6	-7.228	2810.3	0.2	564	-16.983	70	14.695
2700	0.434	248	13.591	224	-12.265	2790	0.164	1885.8	-6.752	2851.6	1.086	547	-18.425	70	13.909
2700	-0.441	248	11.955	221	-10.317	2652	0.774	1884.6	-7.017	2871.1	1.41	2702	-4.499	70	13.772
2700	0.884	248	10.357	224	-3.045	2689	-0.771	1349	7.28	2853.5	0.443	2696	-3.987	70	14.787
2678	0.148	248	9.414	220	-11.607	2785	0.652	1880.1	-7.713	2826.3	0.404	2716	-4.394	70	13.591
2678	0.529	248	11.785	223	-8.682	2659	0.204	1885.4	-9.077	2875.8	1.176	2678	-4.429	70	13.065
2678	-0.444	248	9.18	230	-8.25	2642	-2.181	1888	-4.364	2845.1	1.893	2655	-5.327	70	14.892
2678	1.481	248	12.686	216	-7.28	2664	-1.126	1871	-6.806	2848.8	-1.407	523	-18.159	70	15.943
2678	-0.172	248	10.97	226	-7.859	2655	-0.576	1890.9	-6.654	2851	-0.017	2536	2.056	70	15.944
2678	-0.626	248	11.439	216	-8.442	2657	-1.147	1880.4	-1.966	2827.7	-1.074	2581	2.825	70	15.832
2782	-1.666	248	12.614	226	-8.758	2655	-2.753	1956.7	-4.381	2838	0.094	2525	2.424	70	15.922
2782	0.917	248	12.738	225	-6.092	2629	-1.637	1884	-7.895	2848.3	-0.428	2519	0.923	70	13.909
2782	-0.898	248	9.812	220	-10.078	2667	-1.975	1878.3	-6.916	2844.4	-0.133	2540	0.856	70	16.051
2782	0.625	248	8.926	219	-9.673	2653	-1.006	1877.4	-6.021	2873.4	0.301	2530	2.537	70	14.445
2782	-2.532	248	11.642	213	-9.905	2647	-0.889	1854.9	-7.239	2829.9	-0.13	2573	3.477	70	13.021
2782	-0.48	248	11.243	221	-9.324	2668	-1.668	1880.9	-7.956	2877.2	0.407	2555	-0.093	70	13.107
2725	-1.98	110.7	5.097	226	-9.766	2653	-2.932	1876.4	-7.577	2842.6	-0.071	2533	1.408	70	13.487
2725	-4.235	121.9	5.004	226	-10.125	2668	-1.195	1878.7	-8.631	2845.7	-0.011	2553	1.194	70	13.563
2725	-4.055	120.2	3.54	213	-10.778	2649	1.475	1886.4	-7.514	2850	1.489	2554	4.812	70	13.845
2725	-4.87	109.1	3.374	198	-13.207	2654	-1.414	1883.6	-6.477	2868.4	0.752	2511	3.161	70	14.618
2725	-3.034	119.6	3.405	209	-12.752	2755	-0.058	1888.1	-12.925	2854.8	-1.365	2517	5.539	70	14.419
2725	-4.504	113.4	5.532	240	-10.988	2753	1.825	1870.3	-6.43	2807	0.371	2597	3.205	70	13.317
2725	-1.454	114.1	4.929	240	-11.35	2775	1.06	1870.8	-7.831	2855.7	1.608	2626	2.644	70	14.16
2651	-0.286	110.4	-0.227	226	-11.646	2752	0.47	1879.7	-9.3	2863.3	1.453	2643	5.216	70	13.71
2651	-2.689	115.1	6.539	204	-11.931	2755	0.731	1872.9	-9.531	2873.3	1.772	2640	4.608	70	14.011
2651	-2.036	114.6	5.817	221	-10.371	2756	2.428	1873.1	-7.55	2876.3	1.274	2551	3.884	70	13.926
2651	-2.202	111.5	4.31	207	-12.873	2740	-0.263	1885.2	-14.862	2874	1.34	2625	4.657	70	14.107
2651	-1.988	109.8	3.592	223	-8.353	2743	0.46	1885.5	0.929	2854.1	0.896	2649	4.522	222	15.551
2651	-2.23	113.8	5.14	177	-13.252	2742	0.726	1883.6	0.93	2864.9	1.103	2520	2.975	222	14.985
2651	-2.37	102.6	4.97	222	-11.418	2755	-2.101	1890.9	0.853	2837.9	0.873	2626	4.095	222	15.694
2651	-3.129	114.4	5.106	328	-15.172	2756	0.04	1883.7	0.742	2880.1	1.343	3205	-7.594	222	15.984
2651	-1.946	107.1	5.519	223	-10.88	2739	-4.018	1884.4	-9.02	2823.6	1.084	2571	-22.623	222	14.725
2651	-2.505	115.2	5.258	229	-3.488	2798	0.093	1896.4	-12.113	2827.7	1.129	3171	-9.942	222	15.091
2651	-2.361	119	8.205	232	-4.095	2811	0.742	1886.2	-1.395	2857.9	1.368	3373	-4.659	222	14.731
2651	-2.767	115.2	3.416	233	-2.793	2813	1.364	1878.5	1.618	2884.9	-0.466	1051	-55.756	222	15.297
2651	-2.148	103.7	4.433	228	-3.347	2812	0.886	1878.7	-32.532	2874.1	0.236	3550	-1.593	222	16.086
2651	-1.697	287	7.176	232	-5.247	2811	0.319	1874.6	1.42	2893.4	-0.943	3549	-1.115	222	15.283
2651	-2.617	287	7.641	228	-3.51	2796	0.043	1885	-2.951	2869.5	-1.548	3600	-0.684	222	15.225
2651	-1.688	287	6.047	232	-3.448	2737	-1.447	1874.6	-7.223	2869.2	-1.393	3550	-1.747	222	16.142
2651	-2.407	287	4.652	231	-3.942	2751	-1.48	1878.2	-5.935	2854.5	-2.09	3520	-1.216	222	15.658
2651	-1.498	287	6.087	228	-3.428	2744	-1.646	1875.8	-7.373	2867.2	-1.21	3531	-1.998	232	11.014
2651	-2.173	287	5.247	232	-2.847	2742	-2.763	1883.9	-6.699	2886.3	-1.371	3513	-1.295	232	3.799
2651	-2.546	287	5.907	231	-3.726	2749	-2.263	1886.4	-6.341	2776.3	-3.596	1135	-55.47	232	10.487
2651	-2.298	287	6.061	234	-2.241	2747	-6.649	1881.3	-8.563	2867.3	-1.379	3476	-2.46	232	11.548
2651	-1.834	287	6.603	231	-2.753	2958	0.944	1876	-7.184	2836.1	-3.074	3546	-1.473	232	11.308
2651	-2.67	287	6.888	232	-1.977	2746	-3.427	1883.9	-6.365	2873.3	-1.365	3556	-0.907	232	-2.194
2685	-1.804	287	6.438	231	-0.642	2750	-1.431	1888	-7.219	2880.2	-2.281	3560	-1.001	232	-4.897
2685	-1.571	287	7.457	233	-4.024	2752	-4.401	1887.3	-7.537	2701.4	-17.953	3470	-2.951	232	-3.065
2685	-2.918	287	6.839	228	-3.968	2751	-3.97	1877.1	-8.965	3236.7	-7.744	2638	-21.545	232	-5.128
2685	-1.436	287	7.036	229	-3.051	2747	-4.661	1881.9	-6.231	3201.9	-8.067	1706	-38.638	232	-5.892
2685	-1.807	287	6.921	229	-3.848	2752	-9.992	1887.3	-0.201	3105.9	-11.846	133.9	16.479	232	-3.534
2685	-1.34	287	6.02	233	-1.336	2908	-0.708	1890.3	0.118	3178.7	-9.832	125.6	13.593	232	-2.859
2685	-2.368	287	5.245	227	-2.811	2749	2.497	1881.6	0.967	3150.9	-10.352	115.6	11.734	232	10.923
2685	-1.923	287	7.437	226	-3.752	2621	-10.718	1870.6	1.428	3259.6	-7.572	116.1	15.403	232	-5.079
2685	-2.506	287	2.669	230	-2.176	2525	-12.718	1880.1	2.328	3259.4	-9.061	110.8	14.039	232	4.376
2685	-2.031	287	5.314	230	-2.2	2618	-7.413	1881.2	0.842	3215.6	-9.344	117	12.281	232	-1.969
2685	-1.499	348	0.849	234	-3.759	2633	-7.635	1884.8	-3.487	3023	-13.588	113.2	13.148	206	-11.505
2685	0.283	348	-1.016	235	-1.539	2617	-8.791	1888.3	-1.511	2960.8	-14.052	166.7	12.599	202	-11.59
2685	-1.641	348	2.608	235	-2.096	2621	-11.34	1890.9	-4.349	2818.7	-18.264	179.2	14.018	212	-15.852
2685	-0.478	348	-0.627	228	-2.222	2607	-10.223	439	5.474	3210.9	-9.104	178.6	16.211	267	-8.642
2685	-2.093	348	1.41	231	-1.449	2623	-6.878	377	2.544	3258.4	-8.333	177.8	15.757	217	-9.9
2685	-2.123	348	1.516	232	-2.78	2610	-5.502	314	12.188	3235.1	-9.069	171.7	12.573	236	-1.45
2685	-2.285	348	5.216	235	-2.972	2625	-8.955	291	0.643	3218.2	-9.05	168.9	15.237	236	-2.553
2740	2.787	348	0.722	232	-0.666	2614	-11.092	277	2.165	3254.9	-8.364	174.8	15.078	236	-2.076
2740	3.214	348	-8.022	234	-0.455	2665	0.569	218	-0.457	3203.4	-9.339	170	15.238	236	-5.553
2740	2.582	348	-7.301	233	-2.731	2679	-0.64	265	8.618	3255	-8.399	170	16.266	236	-1.722
2740	2.476	348	5.316	229	-1.254	2690	-1.069	222	1.643	3252.3	-8.143	169.7	14.959	236	-1.158
2683	-1.487	348	5.454	234	-1.33	2671	-0.187	268	0.966	3111.1	-10.904	167.4	13.04	236	-5.192
2683	0.378	348	0.452	231	-4.311	2678	1.034	250	1.81	3221.5	-8.43	170.4	16.09	236	-1.527
2683	-0.205	348	0.823	230	-4.476	2684	-0.098	250	0.219	2887.9	-15.579	168.6	15.419	236	-1.329
2683	-0.574	348	0.756	234	-2.982	2670	0.399	455	4.344	3112.7	-11.719	173.5	16.341	236	-1.083
2683	-0.472	348	-3.215	228	-3.578	2674	-0.948	388	4.356	438	11.173	174.3	15.544	236	0.825
2775	1.789	348	11.831	227	0.106	2668	-3.399	368	2.706	428	12.407	170.7	14.724	236	-2.813
2775	1.432	348	-4.488	228	-0.421	2717	-3.611	280	0.664	428	12.563	166.8	14.27	256	-1.792
2775	1.623	348	4.037	237	-2.981	2734	0.557	250	0.536	444	11.386	172.9	15.588	241	-5.873
2775	1.963	348	-3.436	236	-0.62	2739	-3.12	215	3.518	442	13.16	174	15.572	253	-2.9
2775	1.956	348	4.712	230	-3.631	2731	-0.812	215	3.586	432	15.329	169.5	15.46	255	-2.959
2742	3.014	348	-4.143	229	-2.244	2728	-1.676	215	3.258	446	15.058	169.3	11.066	256	-3.472
2742	0.791	284.1	4.315	231	-5.855	2735	-8.418	215	5.807	442	11.233	183.3	15.762	260	-2.649
2742	1.168	284.1	8.702	231	-1.806	2723	-2.728	215	3.804	436	11.776	2471	-9.947	236	2.61
2742	1.397	284.1	8.244	235	-3.434	2732	-2.239	215	5.356	443	12.69	2471	-8.396	236	3.465
2742	1.33	284.1	6.787	231	-3.839	2726	-0.756	215	5.714	403	-3.59	2471	-9.251	239	-4.821
2742	1.9	284.1	4.402	231	-0.724	2725	-0.493	215	4.008	403	-7.196	2471	-7.106	239	0.142
2742	0.79	284.1	7.159	231	-3.7	2729	1.434	215	4.751	404	-3.411	2471	-8.101	239	-5.483
1871	-4.309	284.1	4.882	234	-2.031	2718	1.849	215	5.593	395	-4.748	2471	-7.07	238	-4.744
1871	-4.85	284.1	8.048	235	-1.21	2726	-0.401	215	9.641	398	-5.981	2471	-6.643	240	-1.242
1871	-4.482	284.1	5.831	2546	4.463	2720	-0.646	215	4.769	402	-4.121	2471	-8.127	235	-3.901
1871	-5.971	284.1	3.482	2546	5.359	2715	1.684	215	3.106	401	-2.325	2479	-7.973	235	-4.721
1871	-3.999	284.1	3.542	2546	4.927	2708	0.923	215	2.613	391	-5.948	2479	-8.923	245	-8.584
1871	-4.29	284.1	4.122	2457	2.443	2712	0.799	215	3.128	400	-4.502	2479	-7.608	275	-4.741
1871	-4.539	284.1	4.658	2457	5.525	2717	0.026	215	4.043	414	-4.843	2479	-8.663	283	-10.443
1871	-5.371	284.1	7.503	1928	5.775	2707	0.658	1658	-4.99	400	-4.288	2479	-7.084	245	-9.948
1871	-2.898	284.1	6.654	1831	-3.875	2709	1.15	1733	-5.032	397	-3.207	2479	-7.724	278	-16.033
1815	6.482	284.1	7.628	2510	4.443	2712	0.346	1237	-15.696	384	-5.08	2479	-6.994	278	-16.515
1435	-3.085	284.1	7.407	2520	0.904	2708	0.1	1840	-1.015	421	13.618	2479	-8.622	248	-11.272
1435	-1.646	284.1	9.797	2512	3.069	2710	-1.026	1206	-15.192	426	10.563	2479	-6.408	245	-2.652
1435	-1.245	284.1	6.392	2554	2.129	2603	-5.936	1837	-3.036	432	11.516	2479	-9.927	236	-5.977
1435	-1.725	284.1	7.636	2575	5.784	2611	-10.24	1830	-2.196	426	12.246	2463	-7.544	240	0.182
1435	-1.252	106.3	2.214	2558	7.728	2600	-4.784	1320	-12.374	427	11.873	2463	-3.827	240	-4.103
1435	-2.659	106.3	2.404	2603	6.184	2605	-4.858	1786	-2.225	428	13.516	2463	-4.342	227	-5.309
1435	-1.626	106.3	1.487	2542	4.117	2605	-7.323	1781	-3.166	428	12.547	2463	-5.001	279	-8.755
1435	-0.944	106.3	0.256	2463	-0.655	2608	-5.661	1770	-2.091	429	12.009	2463	-4.162	234	-4.811
1083	-3.458	106.3	0.99	2463	0.26	2603	-5.382	1724	-5.205	429	12.93	2463	-5.996	234	-3.351
1083	-1.906	106.3	0.882	2463	4.884	2599	-7.174	1788	-1.015	435	12.126	2463	-4.731	233	-5.386
1083	-4.649	106.3	3.161	2463	-0.209	2634	-4.478	1819	-1.212	430	10.593	2463	-6.032	242	-6.557
1083	-4.325	106.3	2.301	1861	2.875	2614	-6.569	1788	-1.649	435	12.181	2463	-5.097	236	-0.491
1083	-2.803	106.3	0.06	2463	0.282	2739	-3.635	1770	-1.844	435	14.554	2463	-4.147	233	-9.092
1083	-4.427	106.3	2.033	2463	2.935	2747	1.406	1872	-2.576	433	9.765	2506	-7.748	233	-6.325
1083	-3.474	106.3	-0.39	2463	4.487	2746	-0.212	1793	-1.678	439	12.809	2506	-8.025	224	13.224
1083	-3.91	106.3	0.877	2463	-3.221	2737	-2.147	1844	-2.357	433	13.179	2506	-4.278	224	13.792
1083	-3.456	106.3	2.349	2463	-1.155	2751	1.139	1467	-9.634	463	13.382	2506	-4.931	224	13.414
1083	-4.536	106.3	0.986	2463	5.815	2749	-0.21	2428	-10.796	431	11.274	2506	-6.27	224	13.982
1083	-3.855	106.3	-0.011	2463	6.246	2755	0.549	1897	-21.315	437	13.437	2506	-8.669	224	13.267
1083	-5.576	106.3	2.935	2463	-1.575	2768	0.747	2469	-7.178	432	13.581	2506	-6.816	224	14.294
1083	-4.676	106.3	1.558	2916	3.154	2758	0.672	2512	-8.391	436	12.121	2506	-4.469	224	14.365
1083	-2.702	106.3	-0.15	2914	6.246	2751	1.038	1737	-24.915	432	11.038	2506	-4.961	224	13.758
1966	-4.834	106.3	0.551	2839	2.781	2768	0.072	2465	-8.96	432	11.856	2506	-6.597	224	14.081
1951	-3.632	106.3	0.389	2884	3.966	2767	-0.433	2035	-18.464	449	14.545	3429	3.31	224	13.802
1010	-24.845	420	3.057	2799	1.559	2749	-1.224	2377	-10.676	182	-7.475	3429	3.118	224	13.985
1017	-19.406	420	4.483	2874	3.037	2768	0.03	2303	-12.129	179	-10.445	3444	3.153	224	12.919
1922	-6.638	420	4.571	2824	3.772	2975	-1.087	2360	-9.013	161	6.12	3240	2.379	224	13.31
1034	-14.79	420	3.492	2898	6.192	2980	2.043	2408	-9.433	89	10.283	3269	1.745	278	2.658
1918	-6.025	420	8.088	2804	3.859	2979	-0.215	2592	-5.207	176	7.905	3267	3.387	278	1.804
1160	-13.698	420	5.552	2877	3.97	2982	0.858	2548	-6.947	91	7.484	3258	3.553	278	2.063
1221	-20.229	420	3.163	2822	2.965	2978	0.176	1790	-21.455	968	0.119	3242	2.781	278	2.248
1976	-4.656	420	6.646	2908	2.571	2984	0.139	1919	-21.076	968	-0.615	3232	2.484	278	4.424
1113	-14.269	420	5.298	2821	1.453	2977	-0.624	2048	-17.26	968	1.095	3240	2.605	278	2.373
1178	-22.085	420	5.111	2724	-0.648	2978	-3.485	1780	-24.817	968	1.242	3273	3.084	278	2.53
974	-17.252	420	4.915	2710	1.083	2978	0.382	2390	-8.934	968	1.889	3254	2.641	278	3.193
1051	-24.202	420	3.813	2710	-0.489	2971	0.639	2272	-13.259	968	1.996	3237	2.634	278	0.419
1056	-13.934	420	5.636	2710	-1.217	2978	1.813	1771	-24.127	968	-0.782	3256	2.323	278	2.282
1092	-7.427	420	6.473	2710	-1.366	2980	-2.039	2428	-10.464	968	0.68	3448	3.757	230	-2.904
1063	-8.227	420	5.734	2710	-0.062	2975	-1.509	2562	-6.706	968	-16.922	3233	2.617	230	-2.784
1048	-8.517	420	5.012	2710	-2.014	2986	1.217	2547	-7.325	968	0.041	3264	3.182	226	-1.625
1084	-9.066	420	4.99	2710	-0.746	2680	-2.465	2380	-10.196	968	-6.074	3271	2.467	231	-2.072
1072	-9.297	420	4.61	2710	-0.325	2594	-2.869	1953	-20.24	968	-0.9	3255	3.292	226	-1.316
1108	-7.204	420	5.29	2710	-0.427	2689	-4.853	1791	-23.31	968	-2.767	3254	3.564	233	-1.638
1190	-4.532	420	5.498	2710	0.299	2659	-4.048	1824	-23.072	968	-0.328	3260	2.065	230	-2.948
1062	-6.918	572.9	0.799	2710	0.279	2702	-1.655	2308	-12.126	968	-0.852	3279	3.532	238	-1.825
1817	2.936	347.6	5.358	2710	-1.292	2652	-2.195	2746	-1.657	968	1.478	3251	1.579	229	-2.942
1044	-8.754	347.6	6.219	2710	-0.874	2663	-2.818	2715	-3.768	968	-2.578	3245	3.108	227	-3.704
1366	2.224	347.6	5.333	2865	-5.484	2631	-0.077	1948	-20.329	966	-2.804	3249	1.792	235	-2.116
1651	1.918	347.6	6.816	2865	2.819	2657	-5.326	1882	-22.491	966	-1.408	3439	1.667	228	-2.386
3466	-0.157	347.6	4.528	2517	-3.585	2633	-1.263	1857	-23.134	966	-3.36	3239	3.661	234	1.231
3466	2.08	347.6	6.107	2865	0.774	2650	-1.434	2720	-4.335	966	-4.764	3265	2.981	234	-10.143
3466	-1.111	347.6	7.309	2517	-3.506	2557	-3.728	2617	-7.155	966	-2.033	2547	-3.269	234	-1.9
3466	1.01	347.6	5.507	2865	6.419	2619	-3.731	2720	-3.182	966	-2.383	2556	-3.24	238	-3.673
3466	-0.894	347.6	5.62	2865	4.479	2666	-1.747	2723	-6.226	966	-2.098	2912	-2.544	232	3.069
3466	1.704	347.6	6.028	2865	3.907	2682	-2.799	1873	-24.249	966	-1.213	2530	-3.167	235	-0.806
3466	1.506	347.6	4.483	2517	-0.663	2658	-2.37	2346	-11.971	966	-4.646	2497	-5.858	235	-0.739
3466	-0.663	347.6	6.941	2865	1.66	280	6.568	1805	-24.9	966	1.247	2940	-0.791	235	-1.119
3466	3.641	347.6	5.182	2865	2.438	280	5.186	2720	-5.221	966	-1.431	2545	3.126	235	3.651
3466	2.082	347.6	5.656	2517	-1.81	299	5.002	2540	-5.676	966	-4.459	2688	-2.466	235	-1.403
3445	-0.995	347.6	6.325	2517	-1.745	282	6.809	1846	-23.397	966	-2.788	3109	4.503	275	-0.679
3445	-1.182	347.6	6.428	2865	-3.565	281	7.284	2720	-4.165	966	-2.057	2473	-6.358	278	-3.331
3445	-0.345	347.6	6.504	2865	3.555	280	2.174	2615	-5.404	966	-1.944	2507	-5.013	275	-0.766
3445	-0.86	347.6	6.351	2526	6.423	283	7.757	1769	-20.291	966	-3.957	2718	0.014	275	-0.412
3445	-1.335	347.6	5.823	2526	4.142	280	15.491	1864	-13.49	966	-2.909	2702	0.223	281	0.667
3445	-1.109	116.5	6.368	2501	4.055	282	12.93	1820	-14.411	966	0.754	2501	-6.215	275	-1.454
3445	-1.048	111.3	5.614	2501	4.257	282	6.169	1820	-13.843	966	-1.38	3008	-1.047	275	-2.714
3445	-1.577	114.9	6.939	2526	6.804	282	-8.715	1824	-12.58	966	-4.408	2523	0.299	273	-1.363
[truncated: 12,882 more rows]
